# Supplementary material for: Polygenic basis and biomedical consequences of telomere length variation
Source: bioRxiv or medRxiv preprint supplement (doi:10.1101/2021.03.23.21253516), 2021-03-24

Supplementary Figure 3. regional association plots for GWAS sentinels.

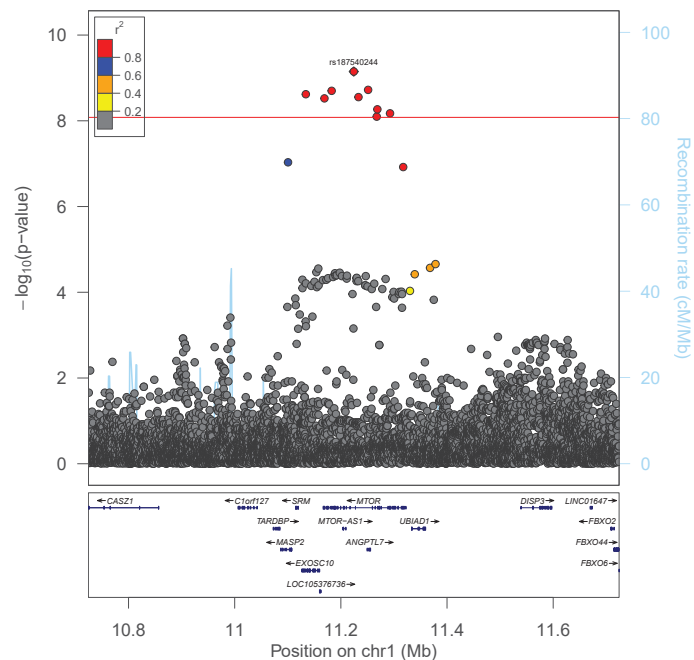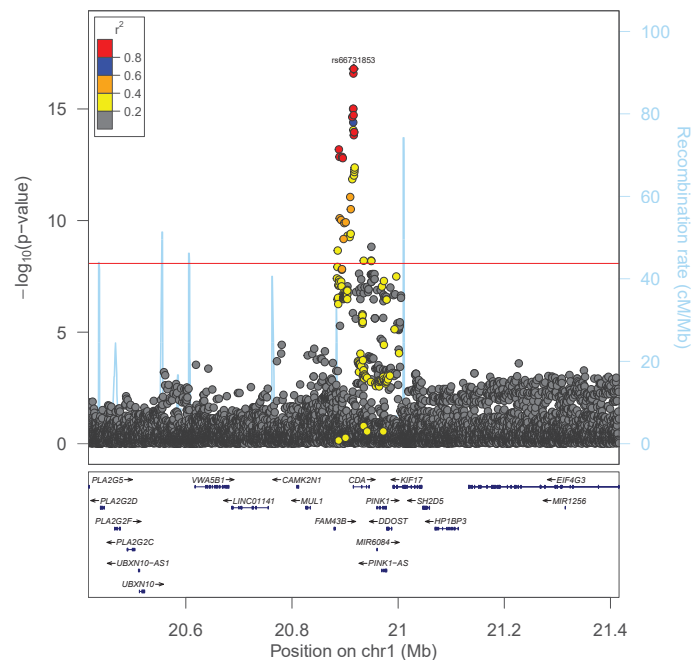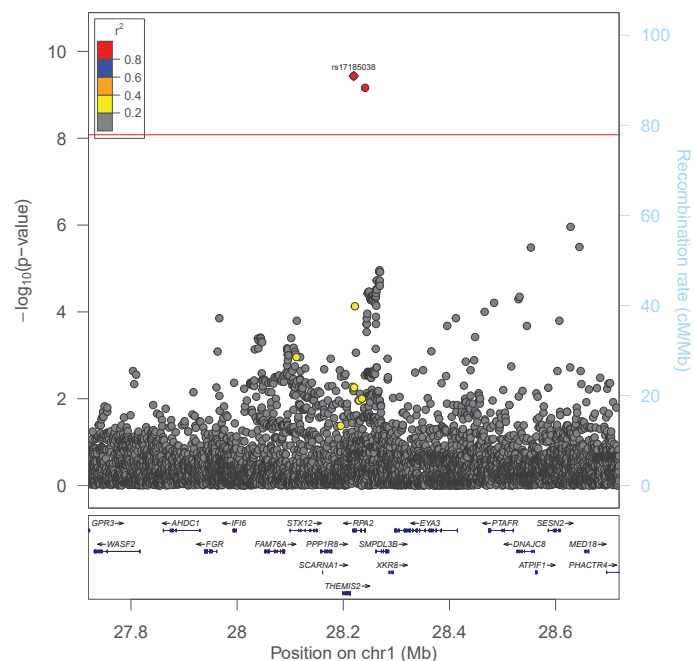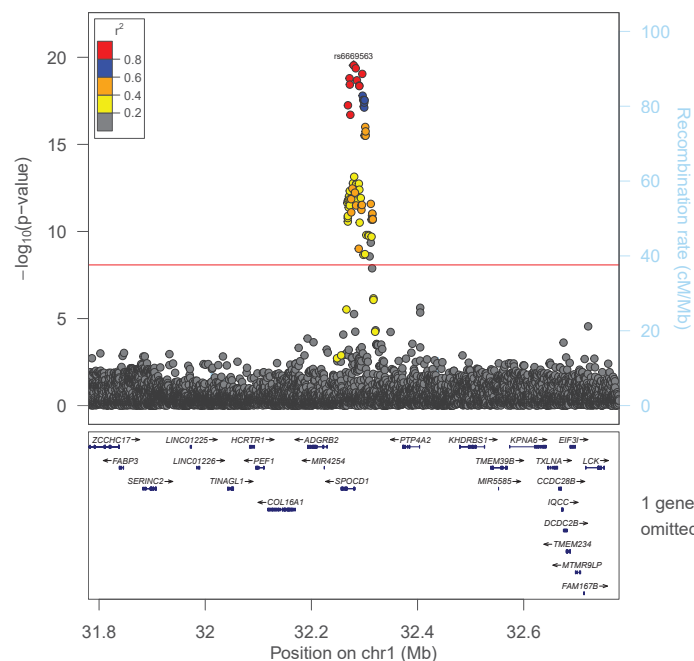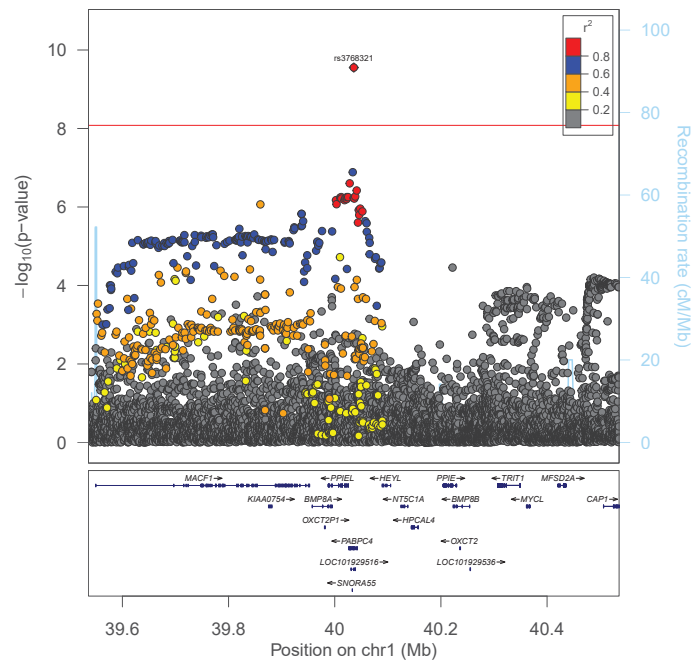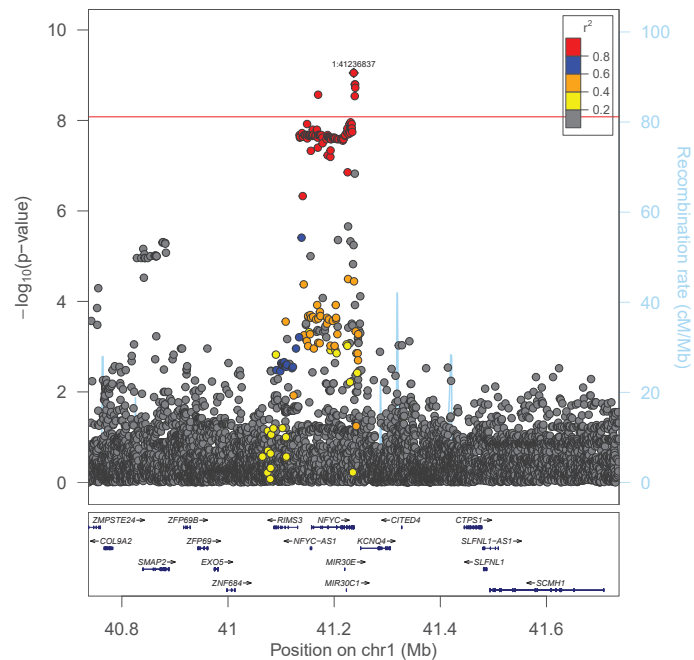

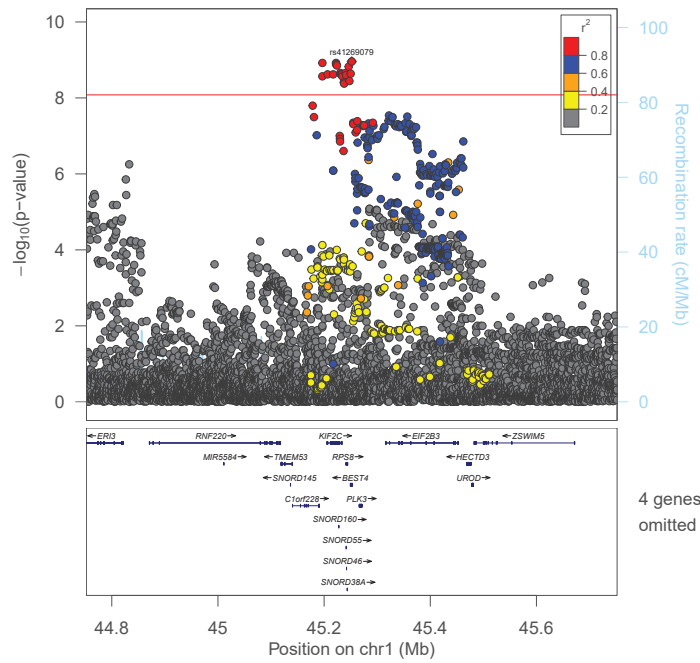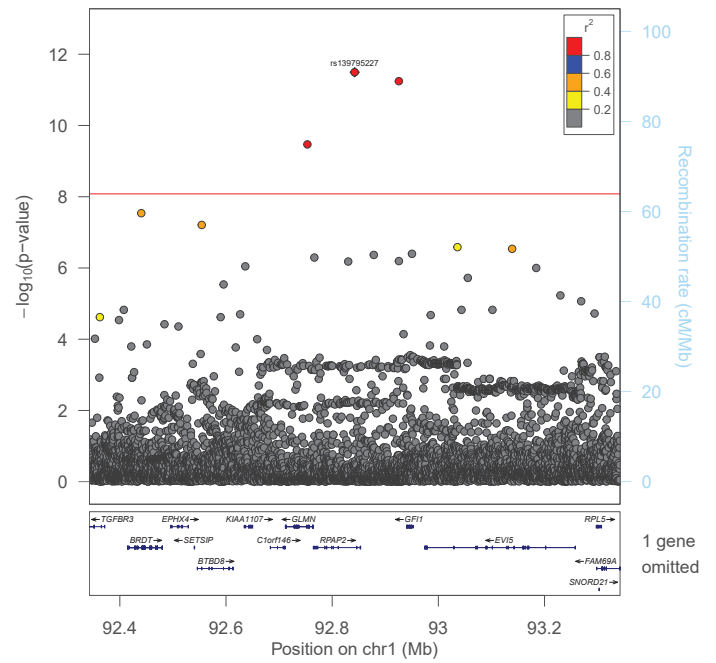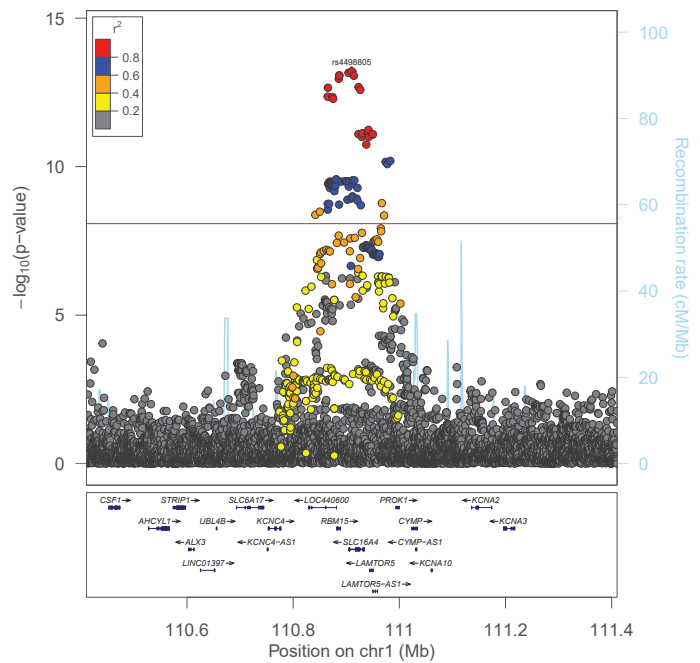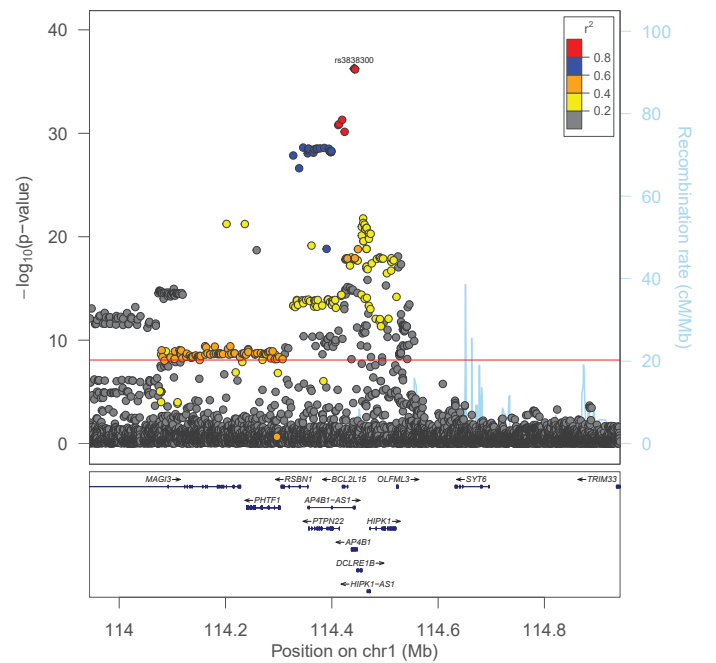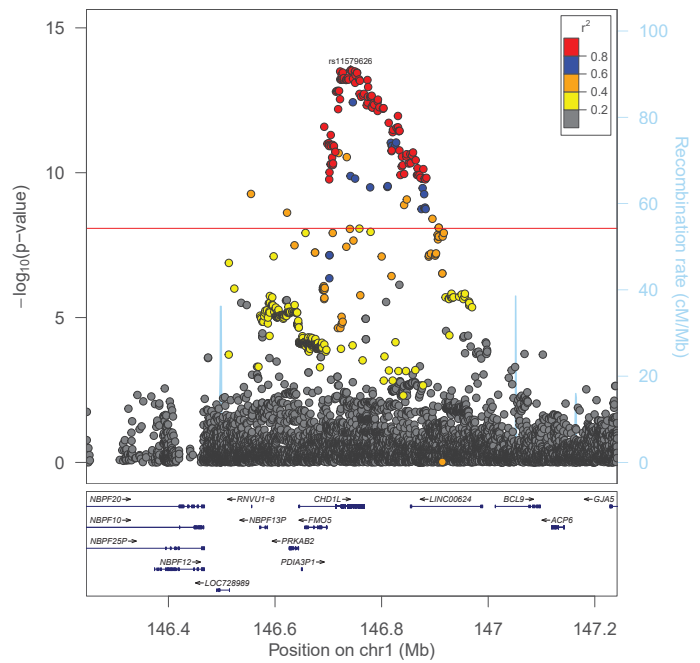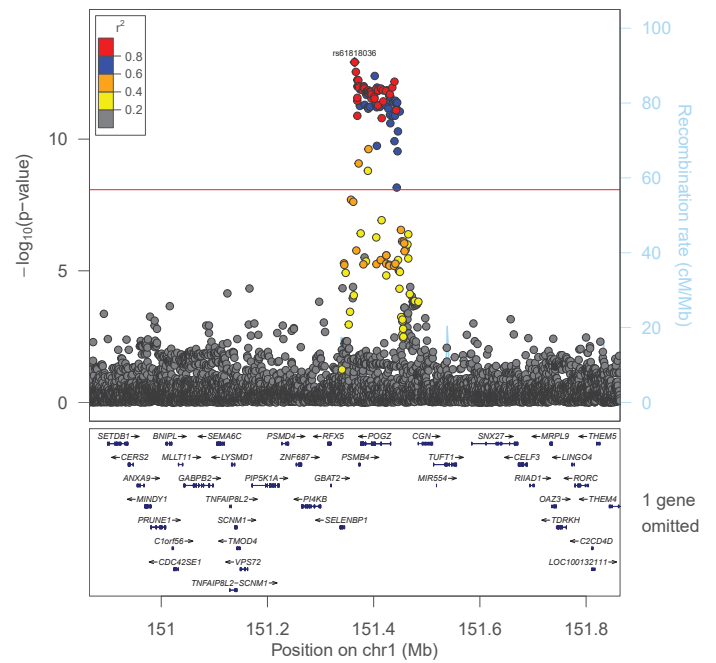

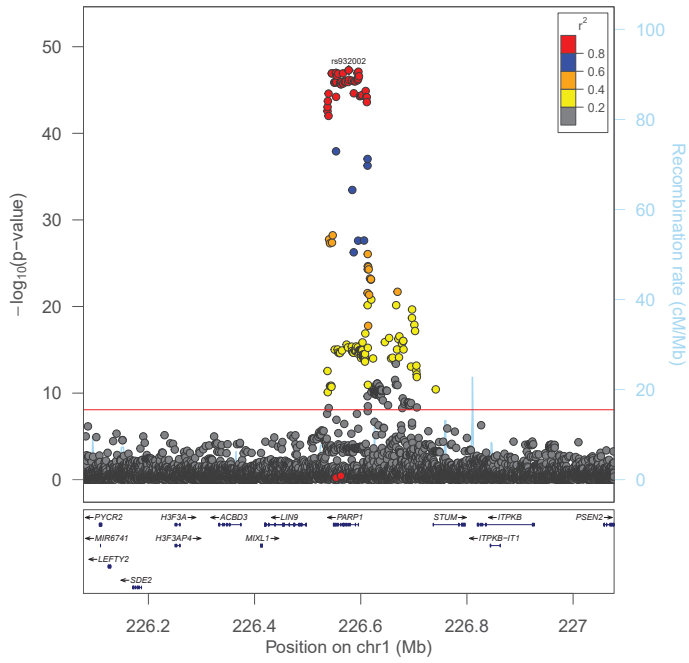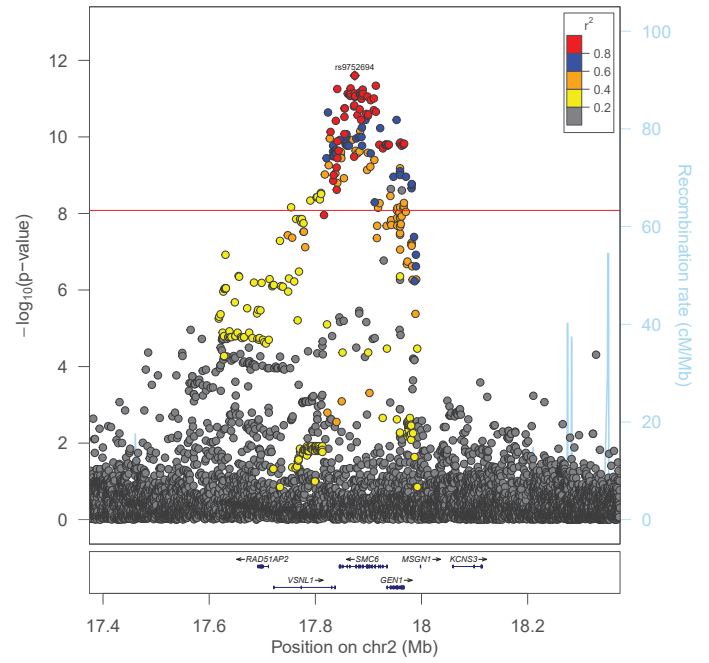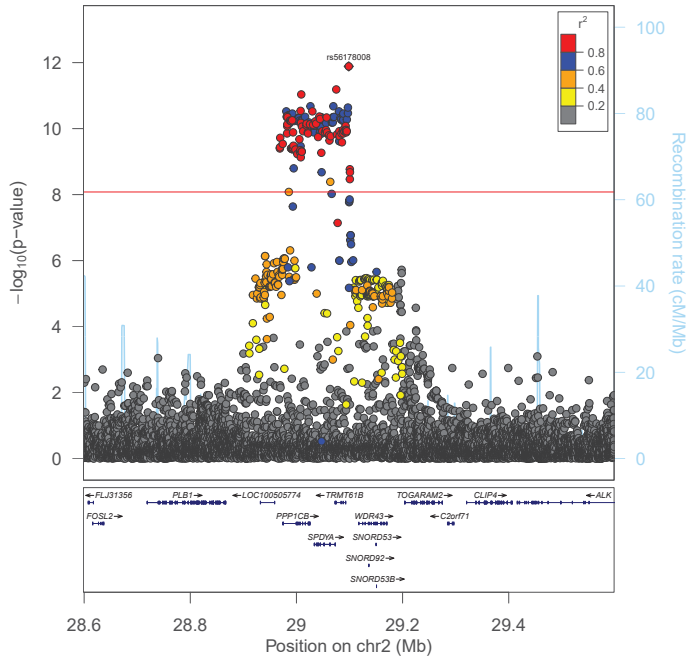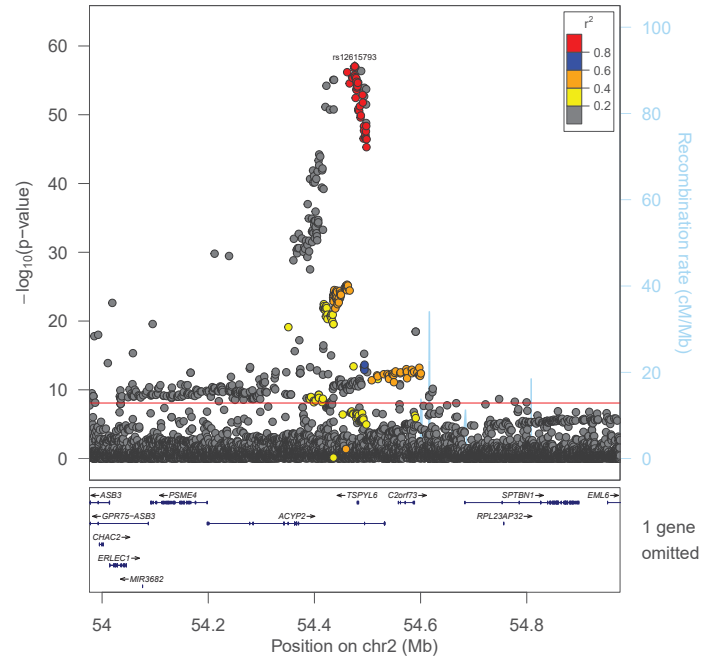

1 gene omitted

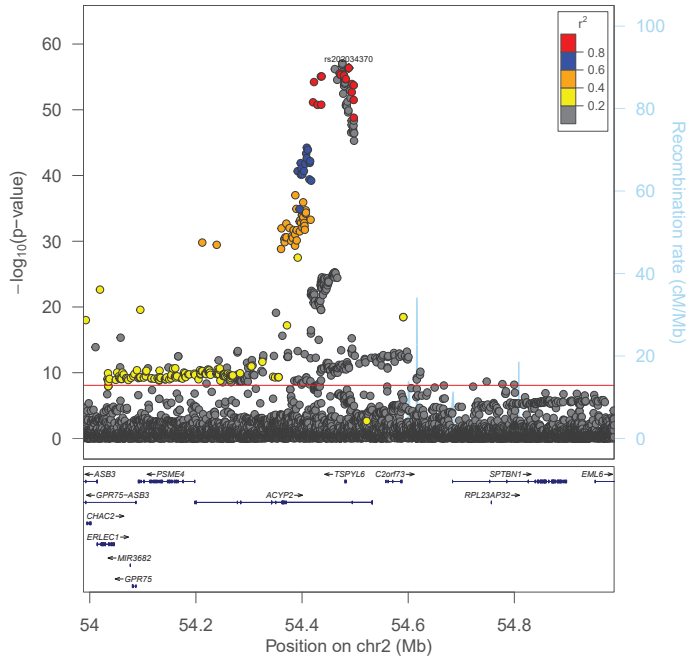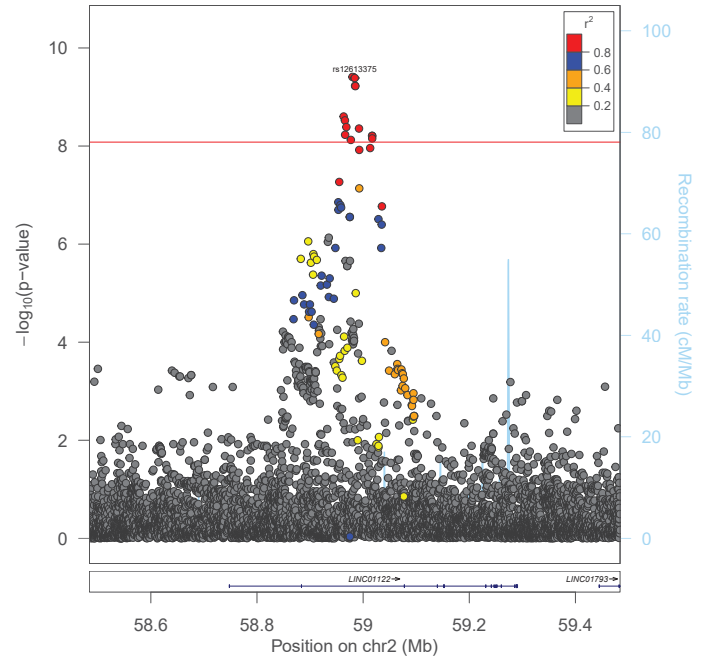

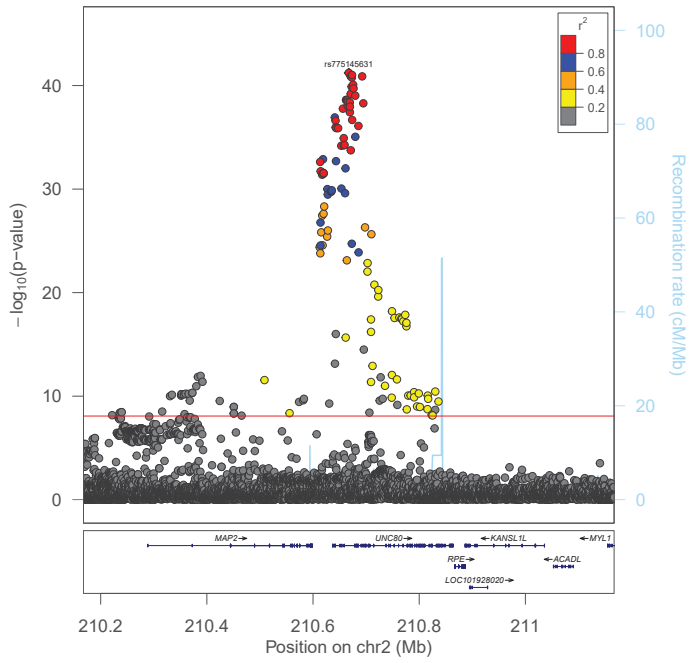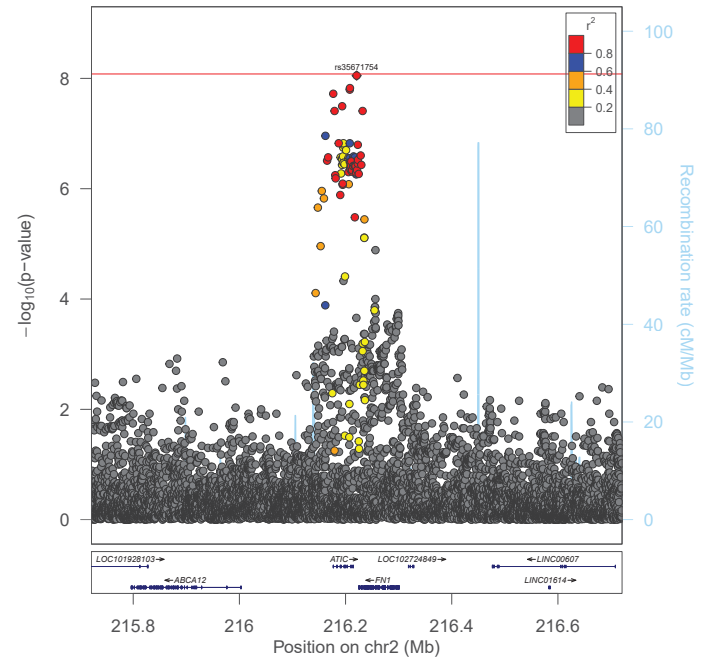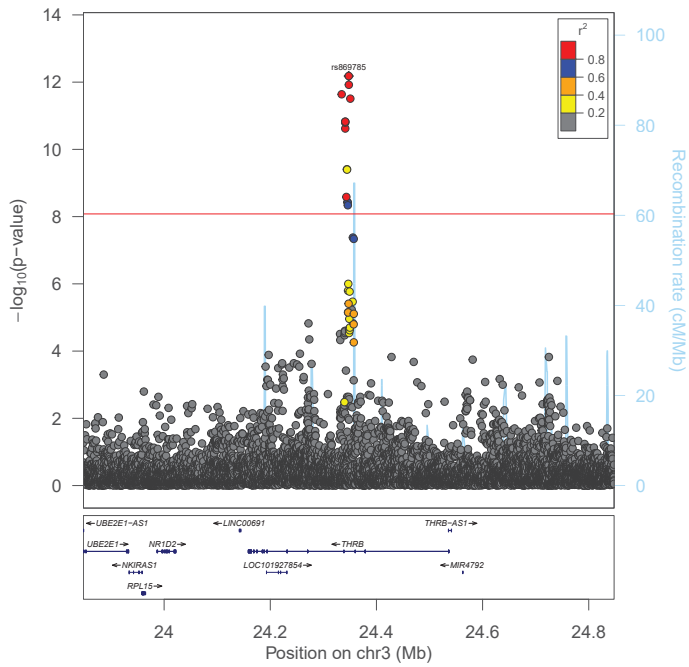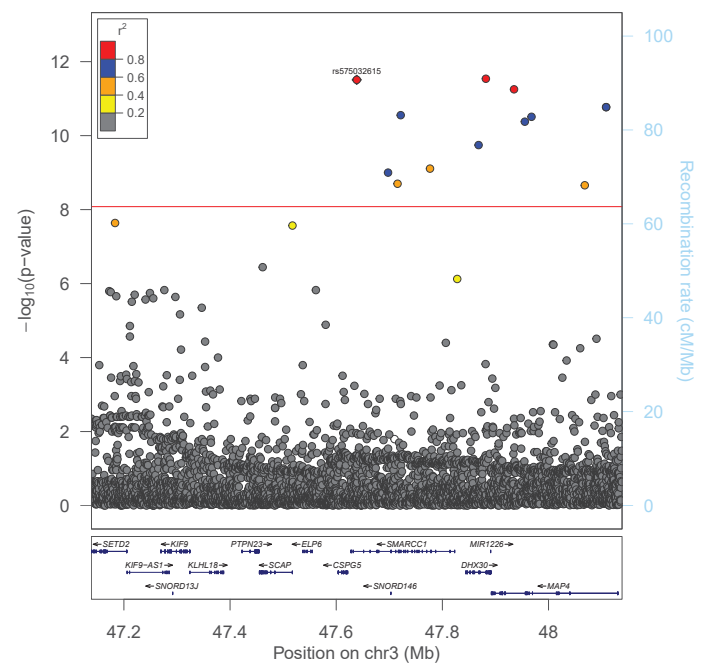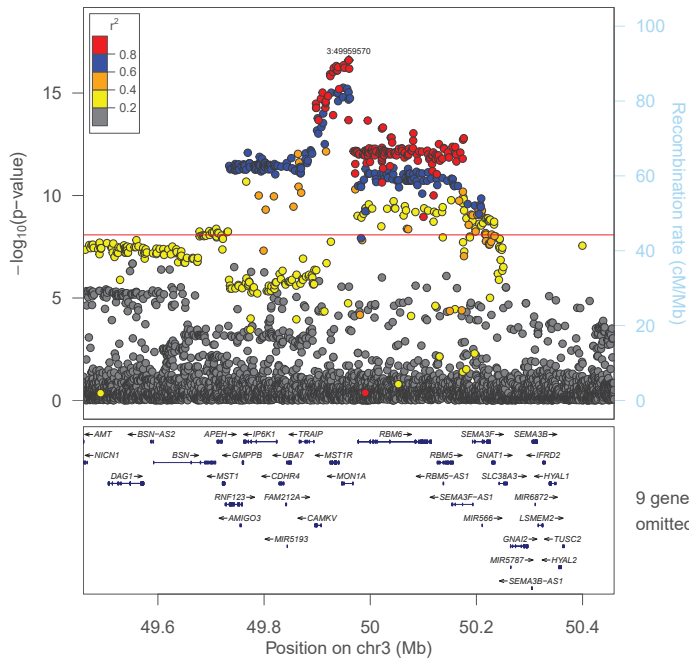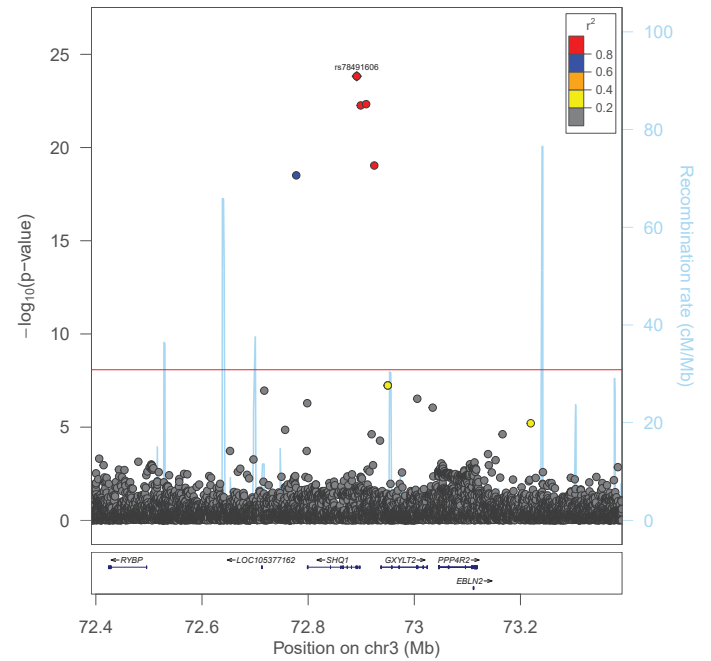

9 genes omitted





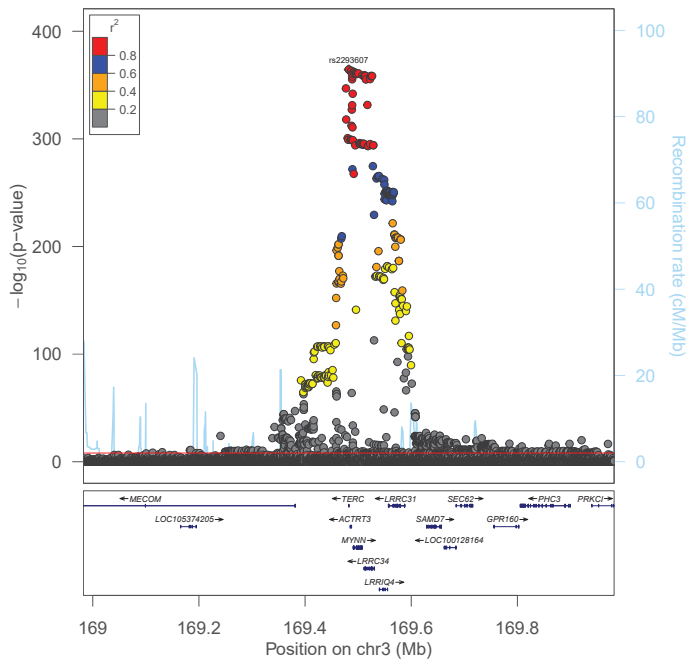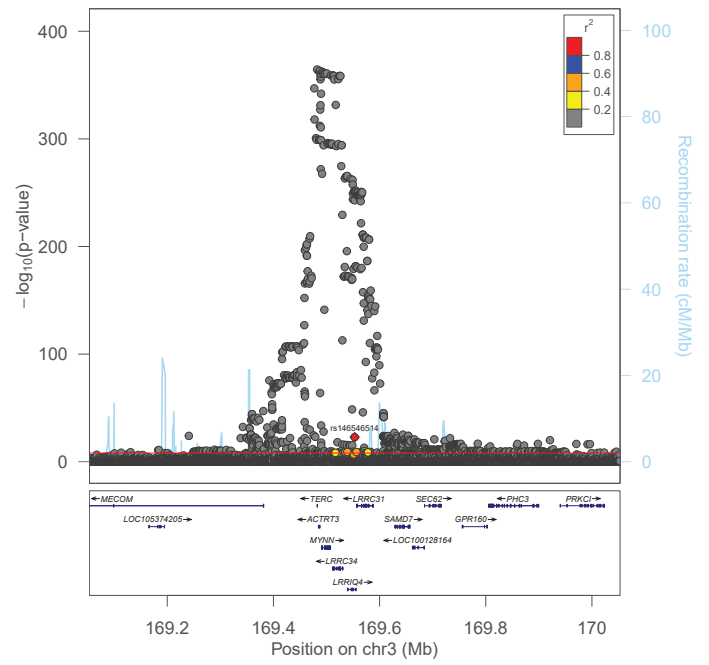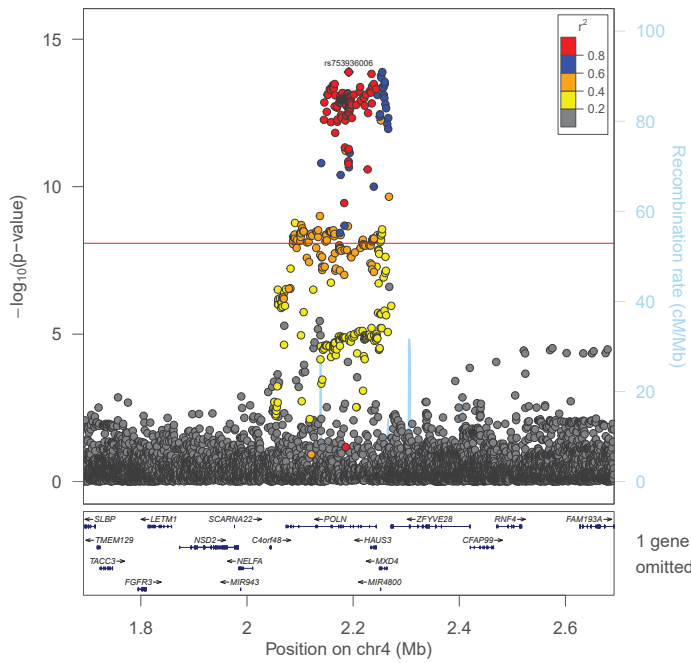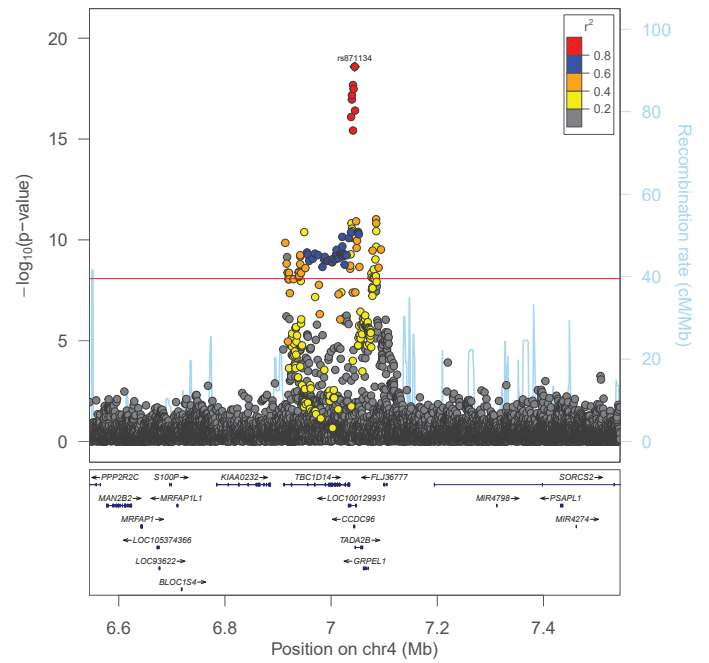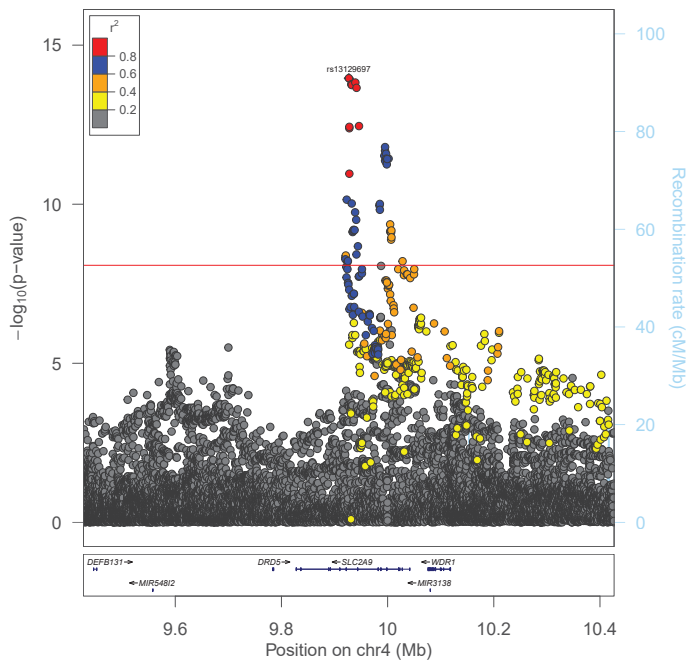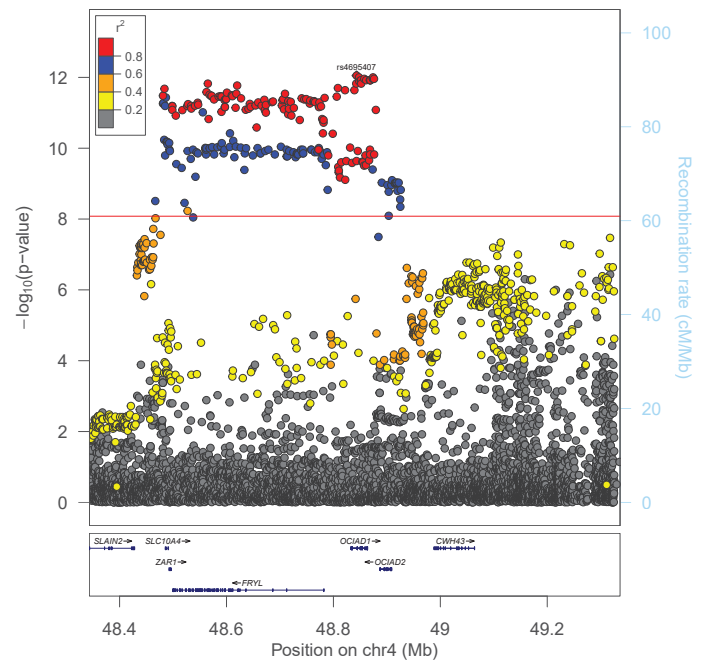

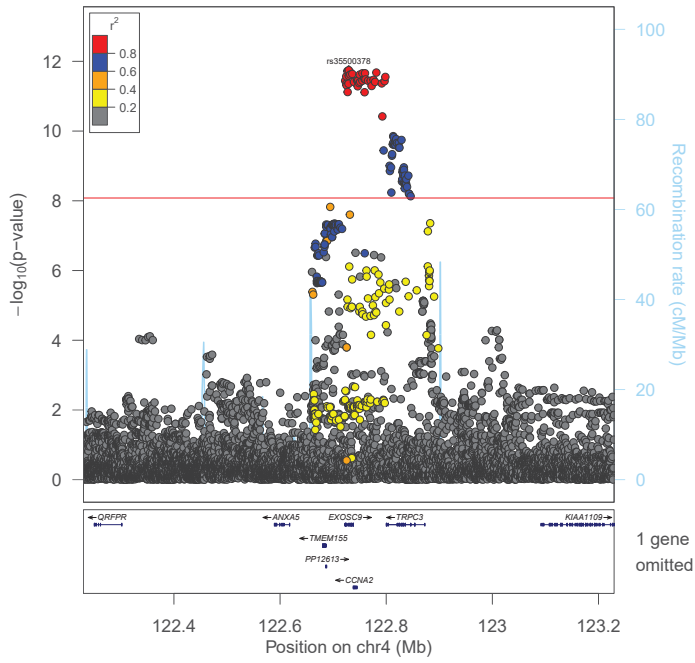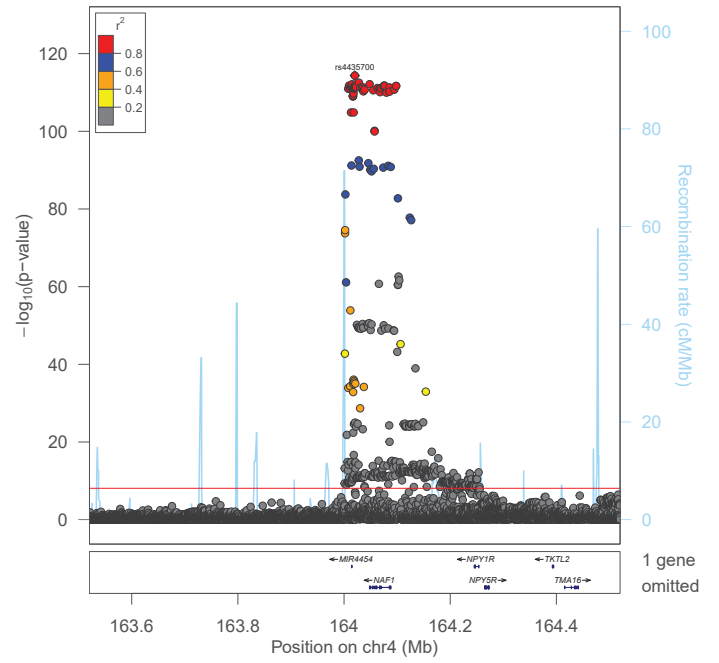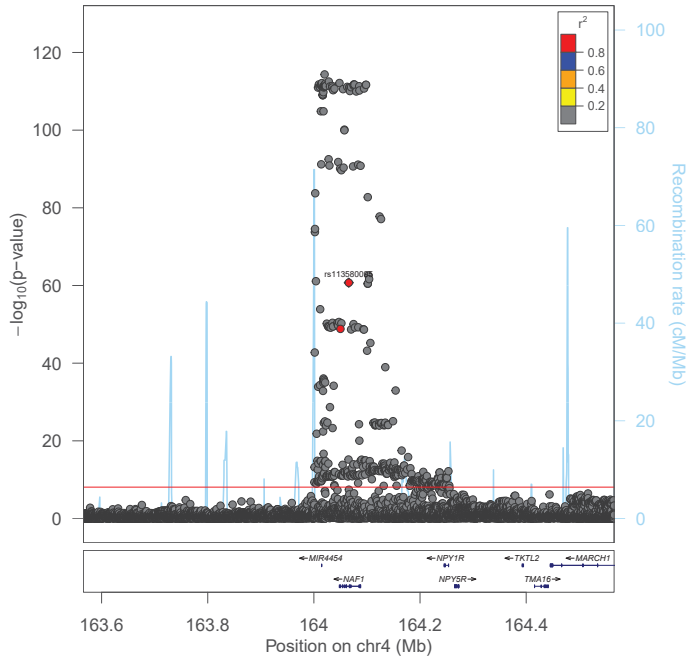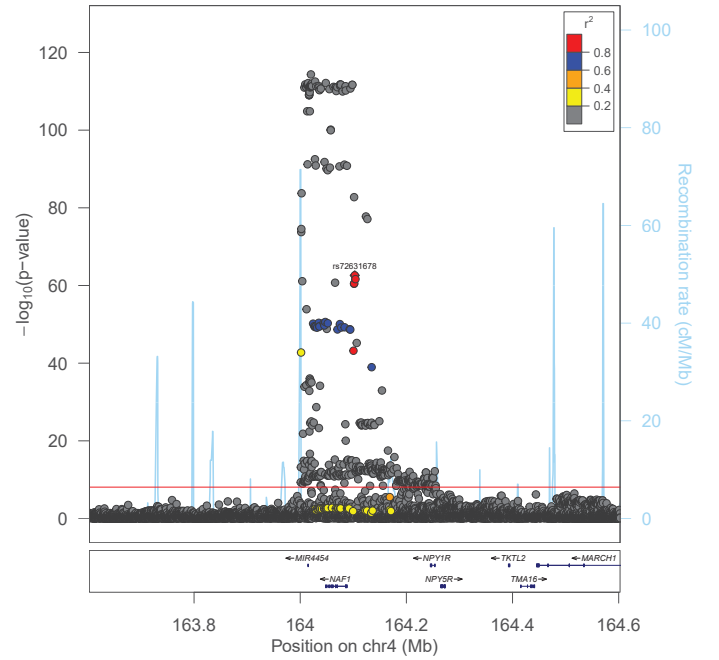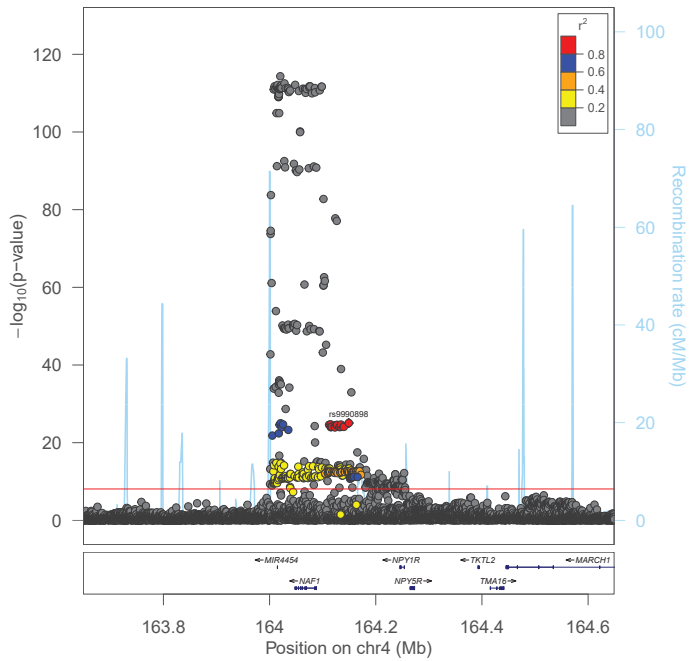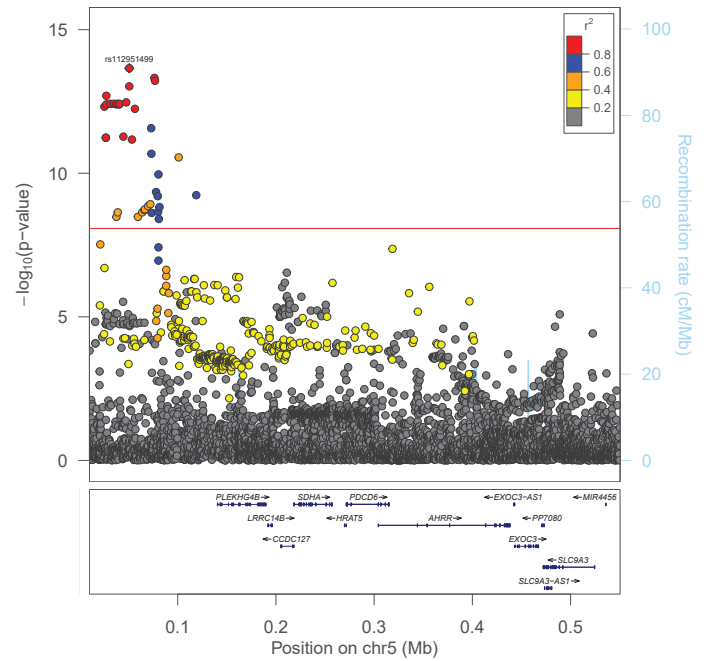

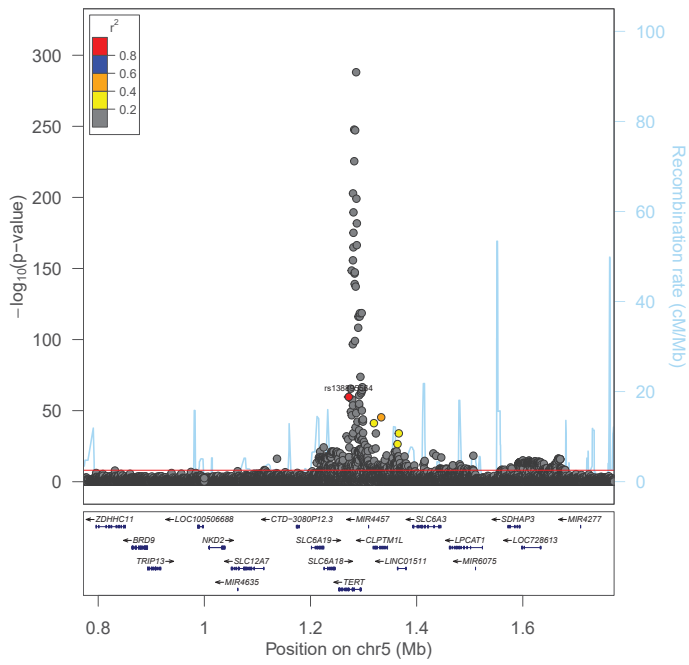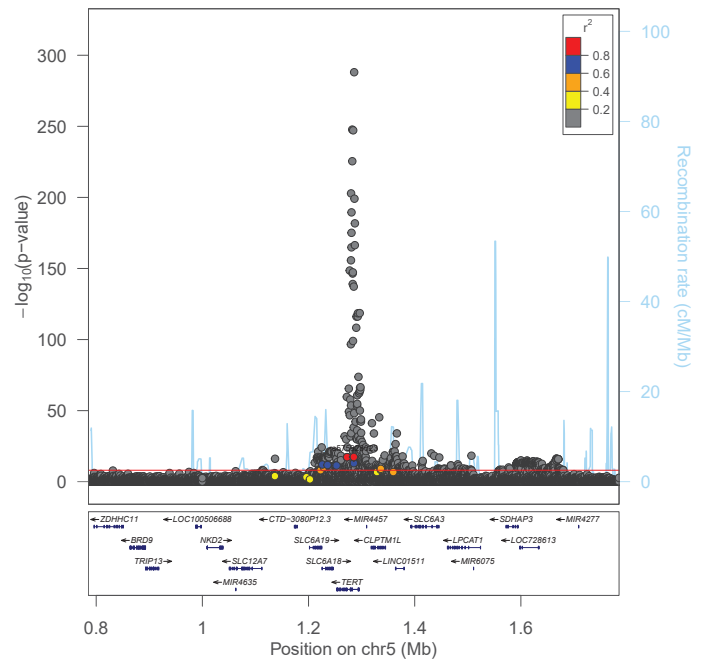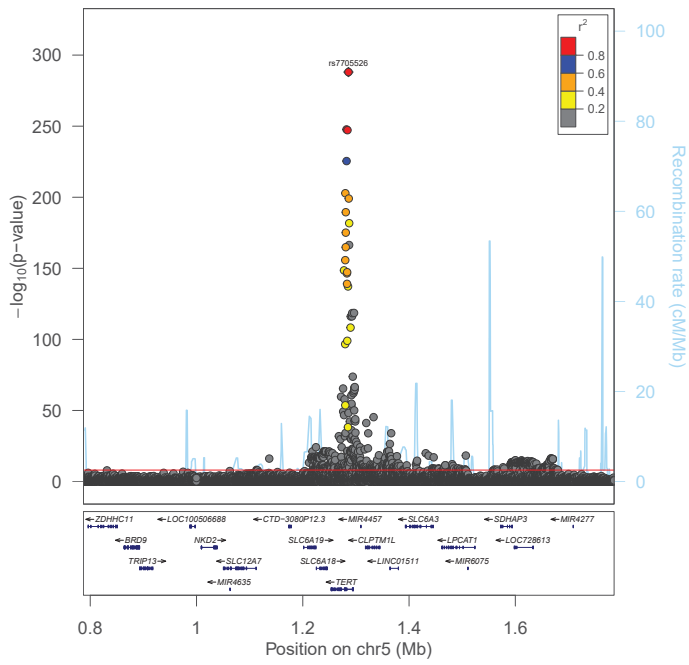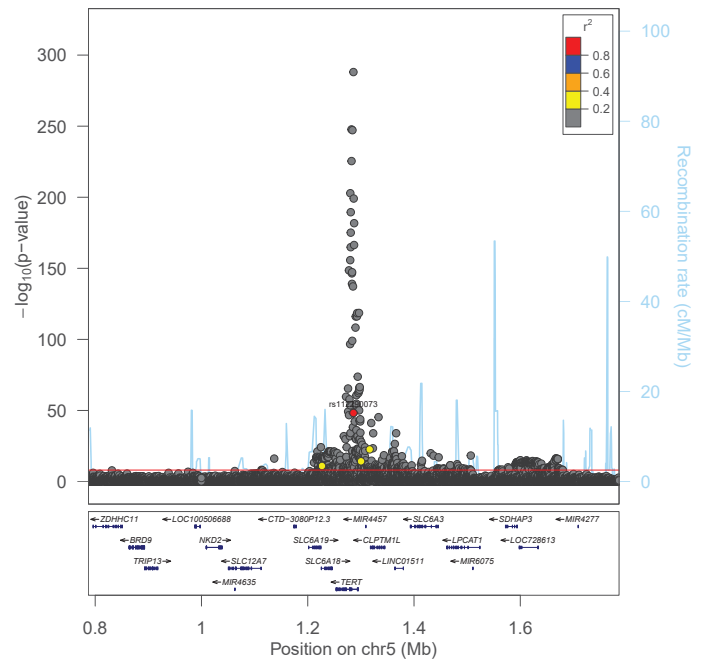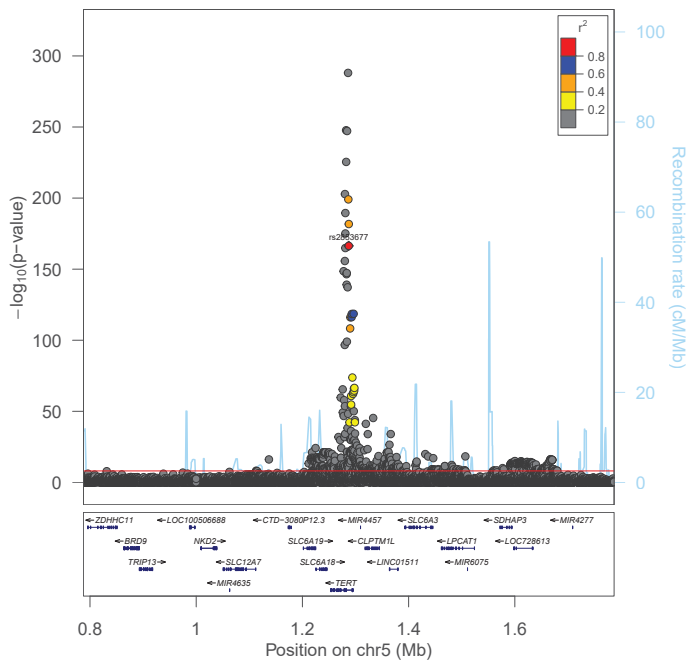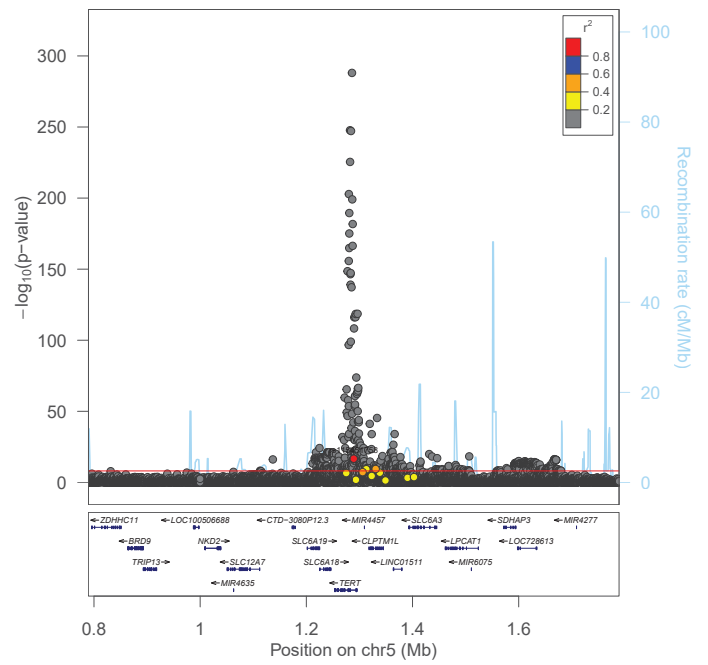



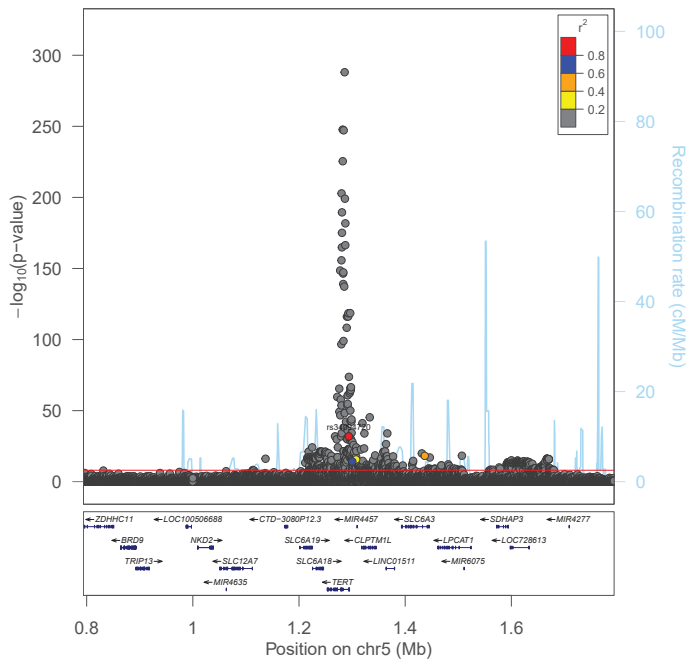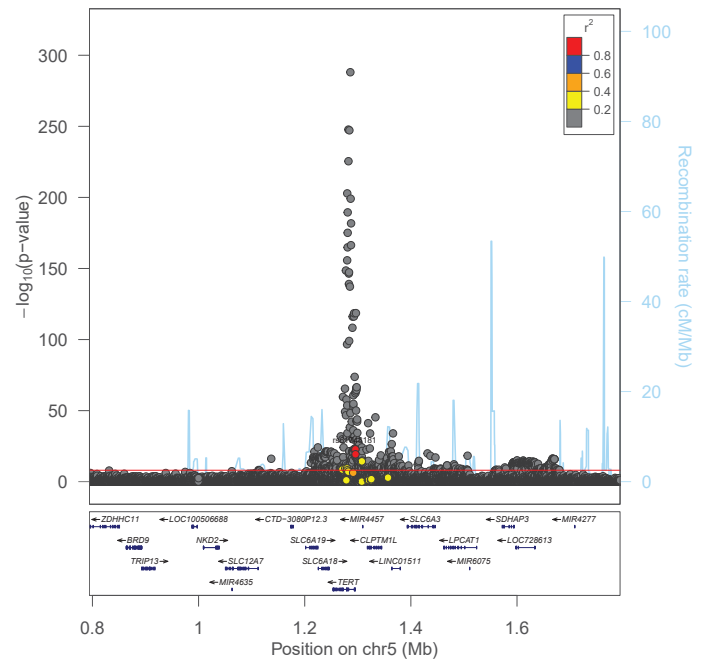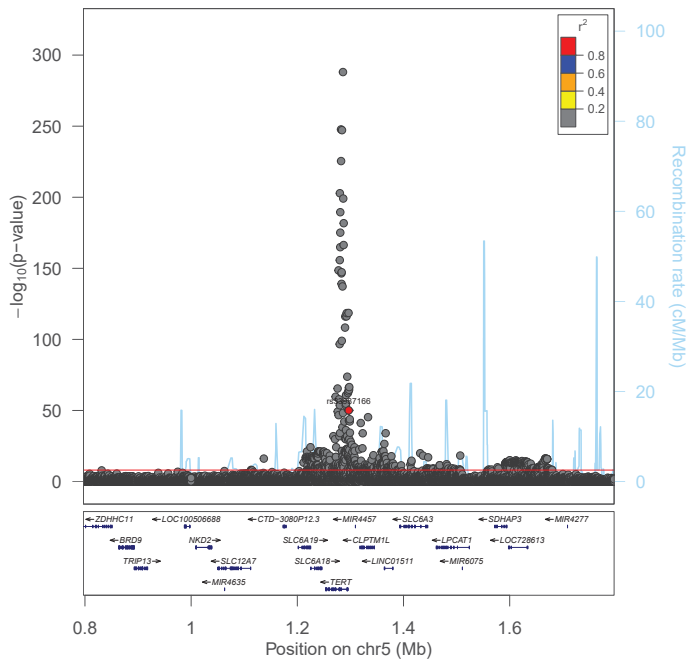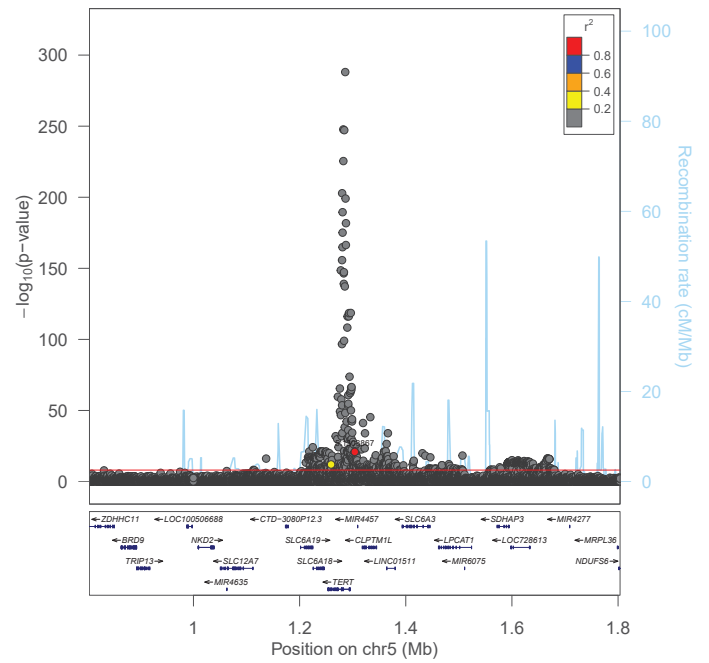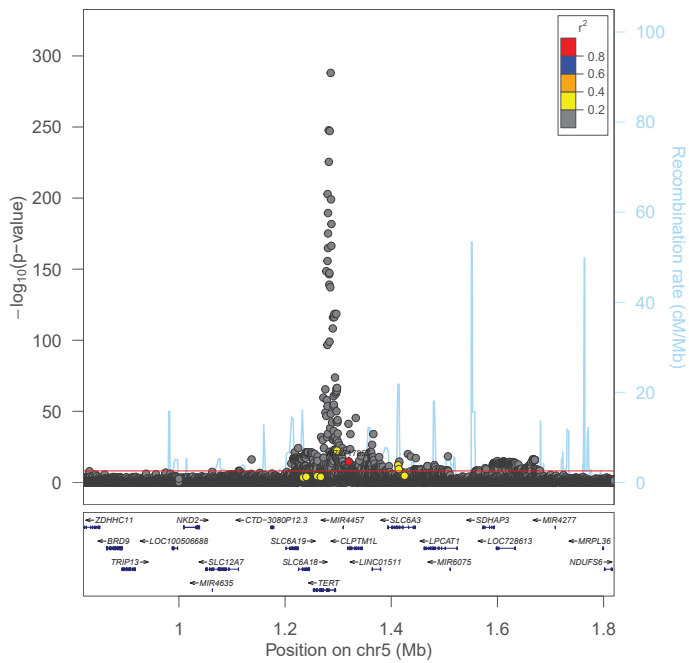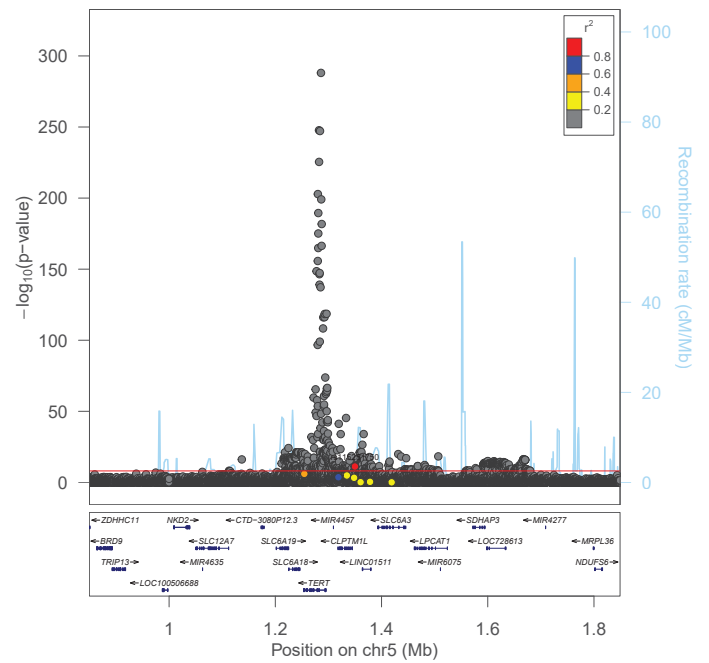

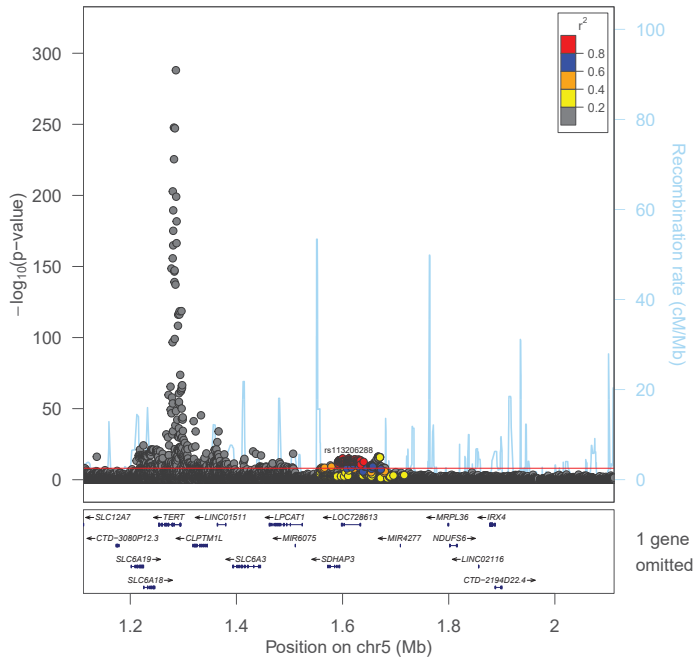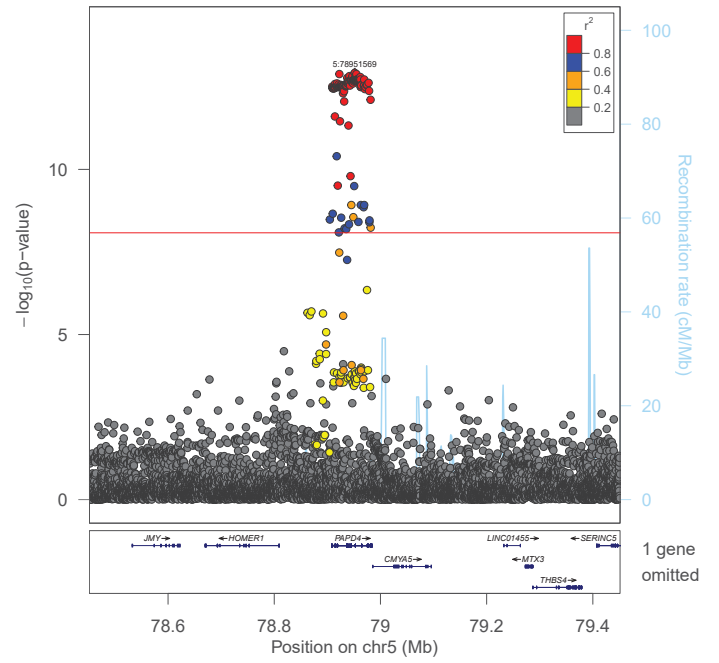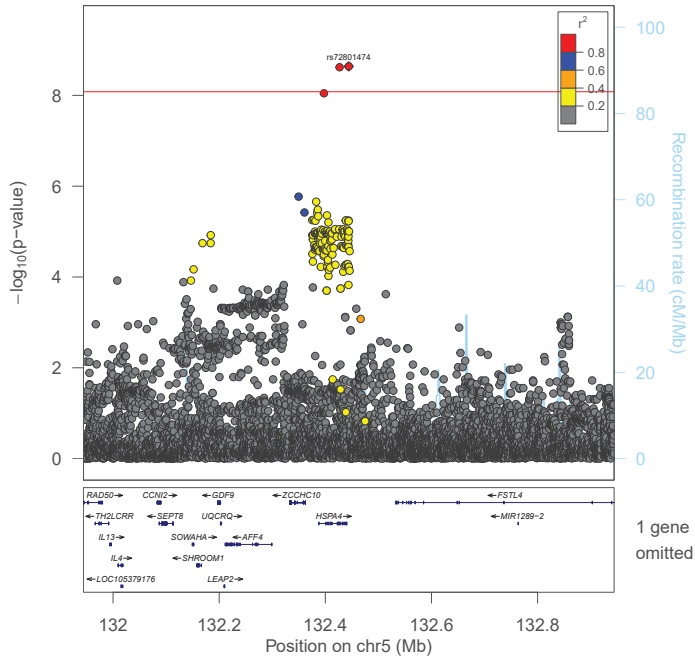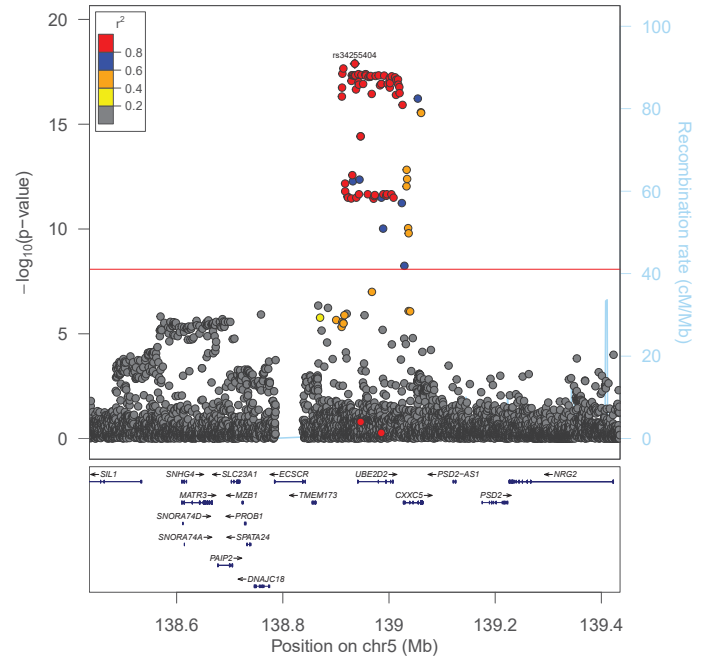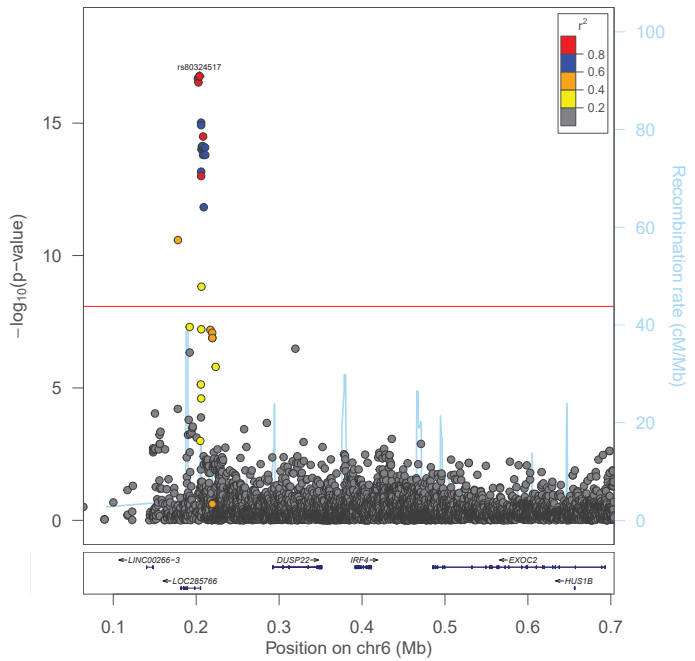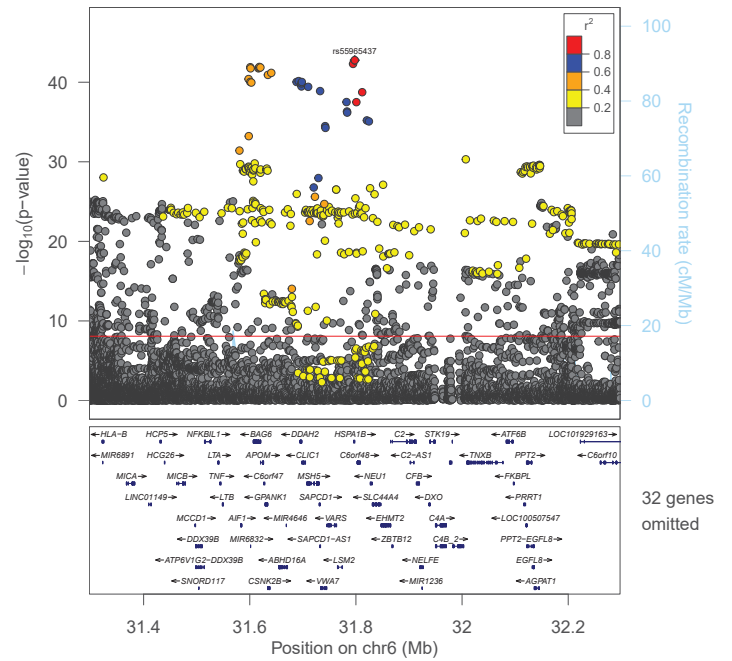

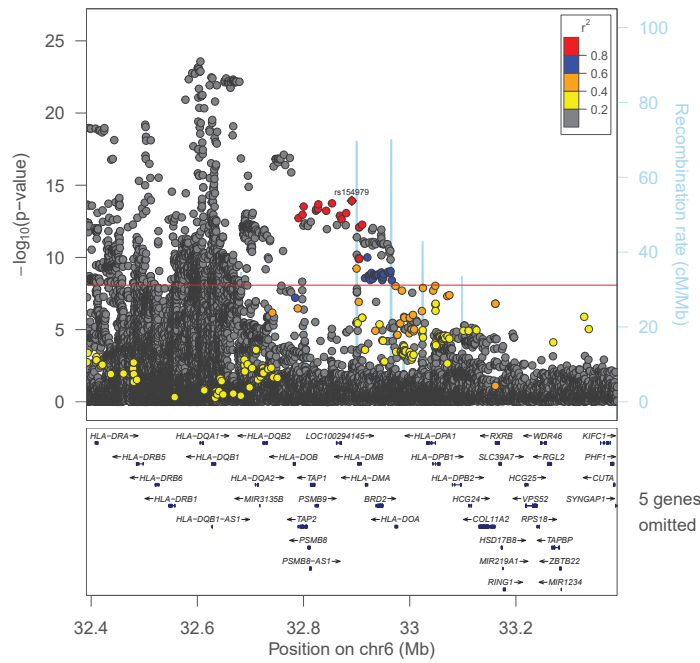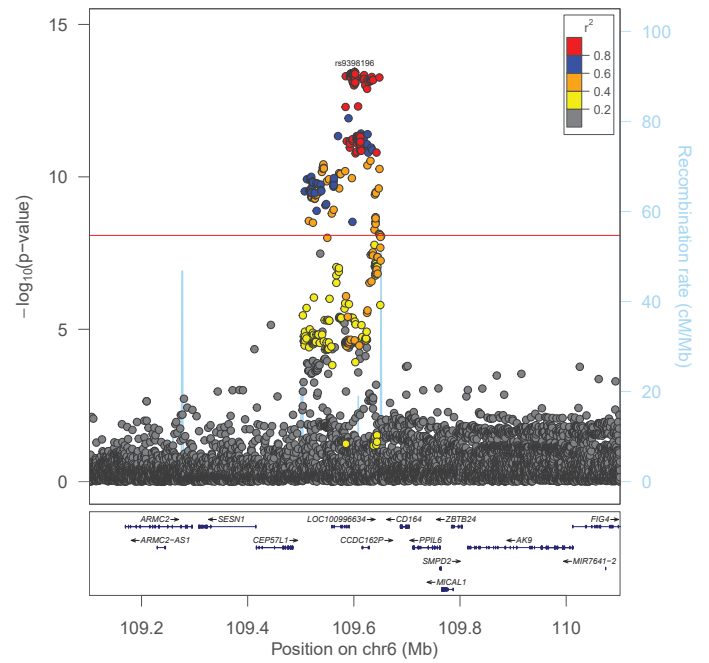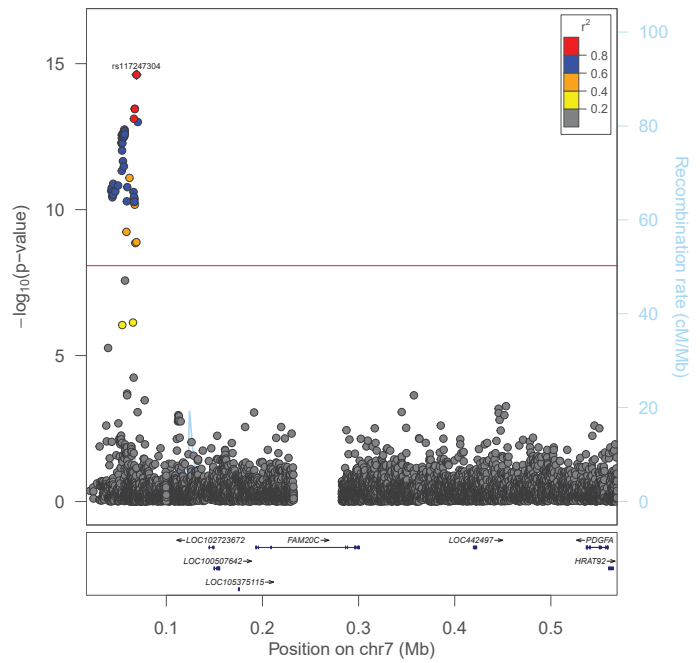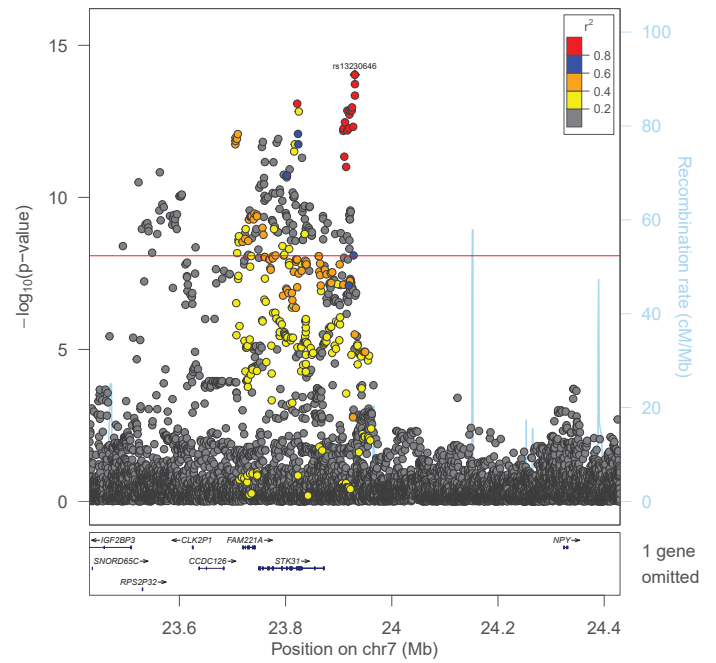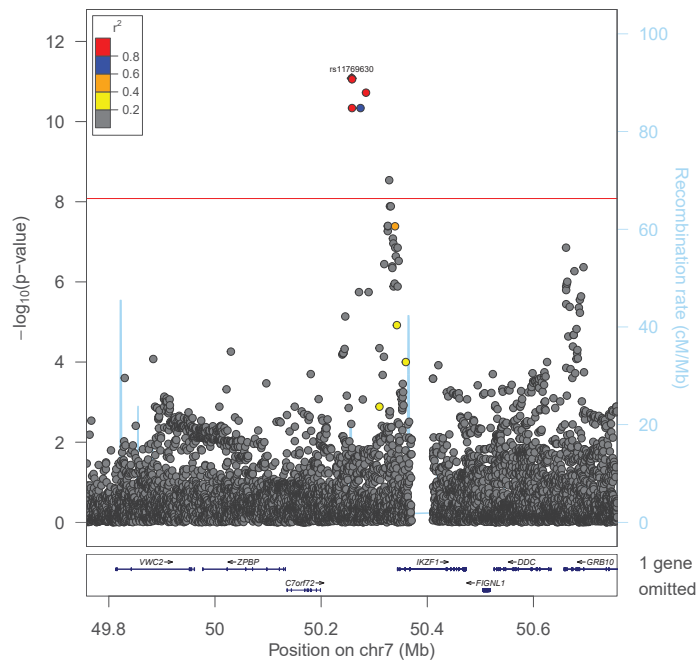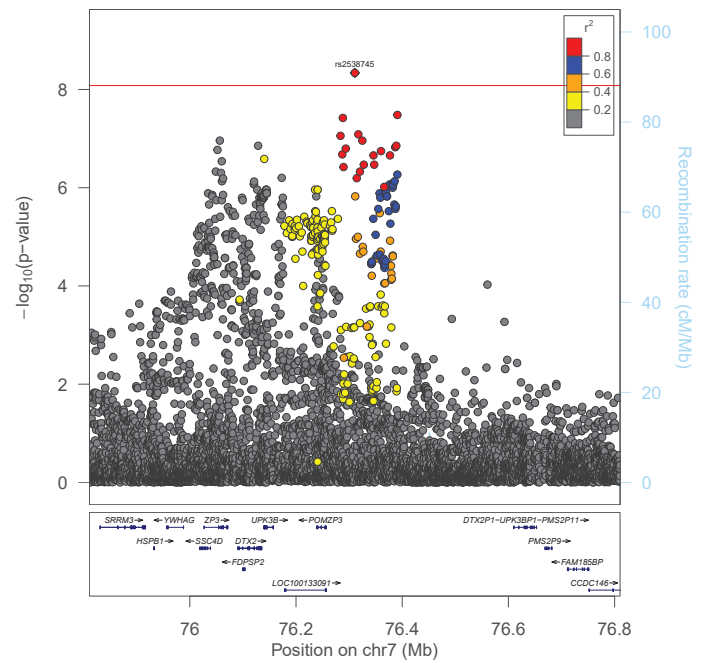

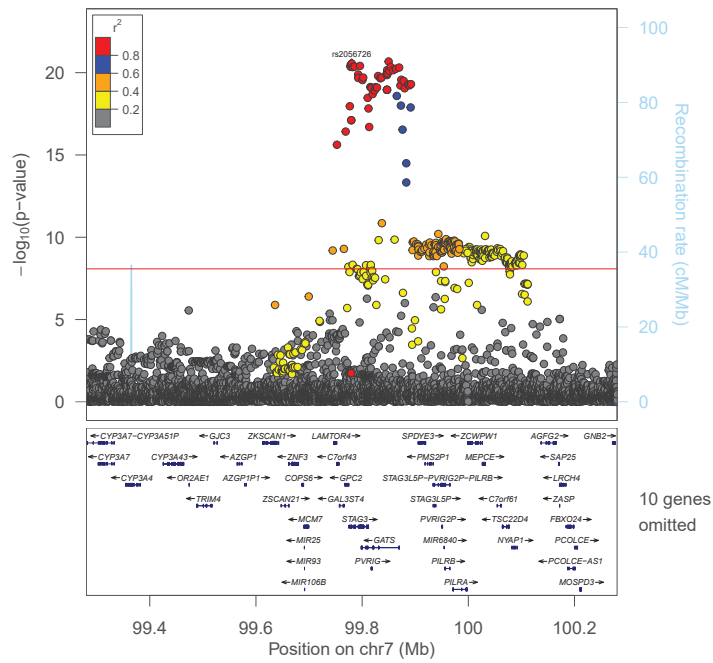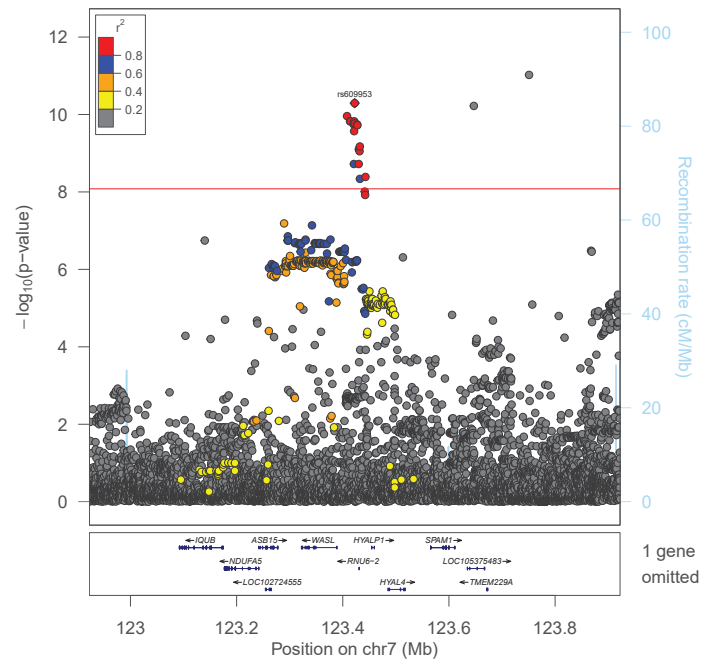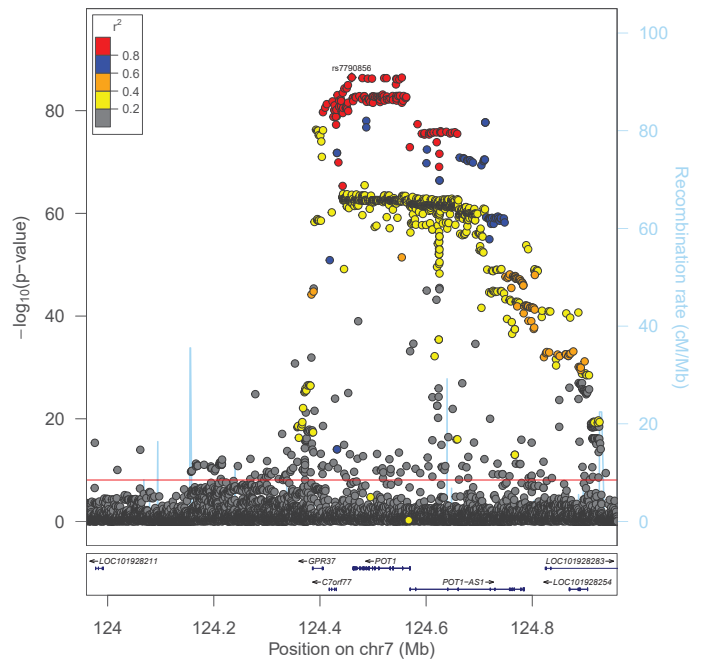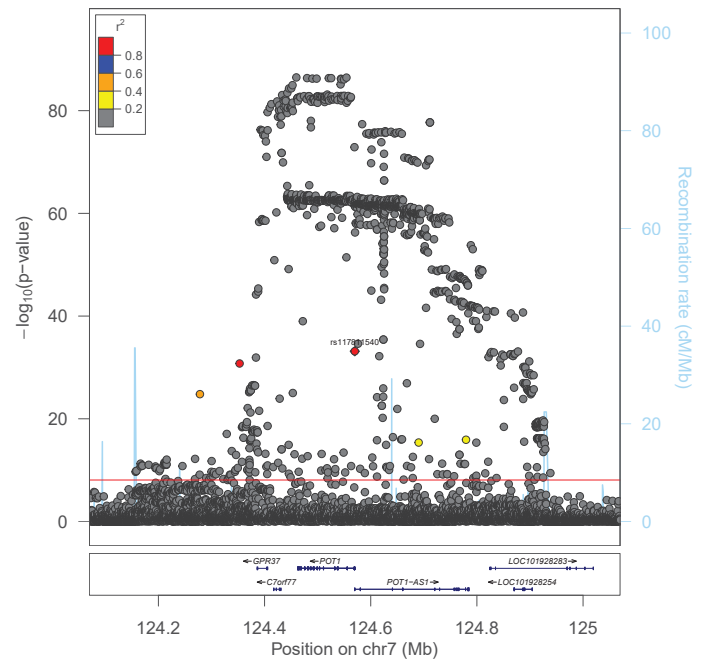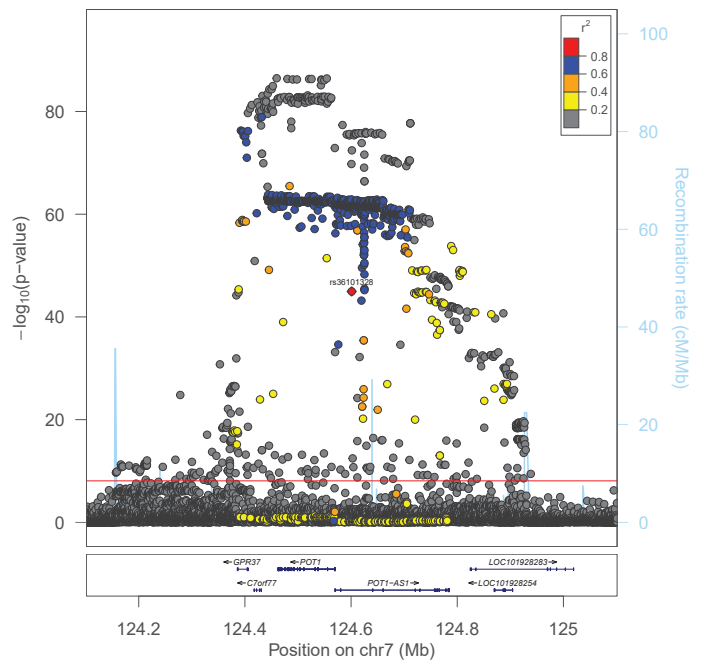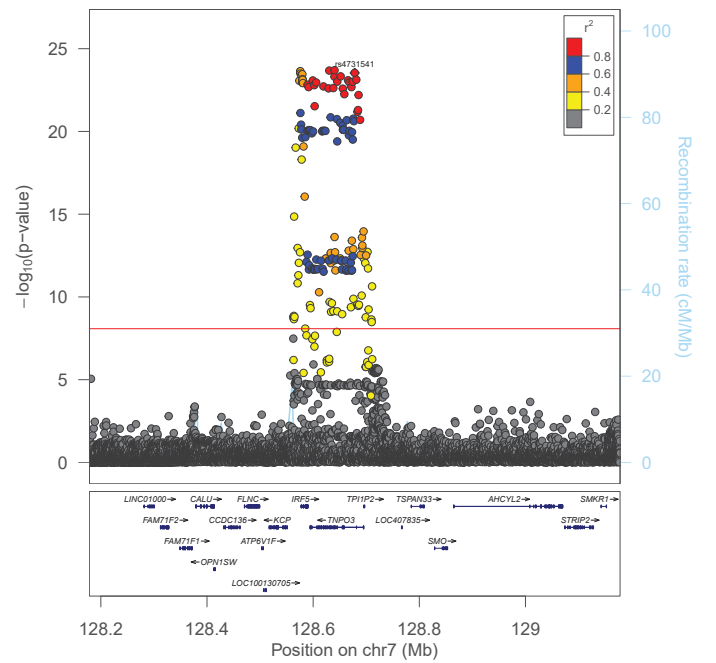



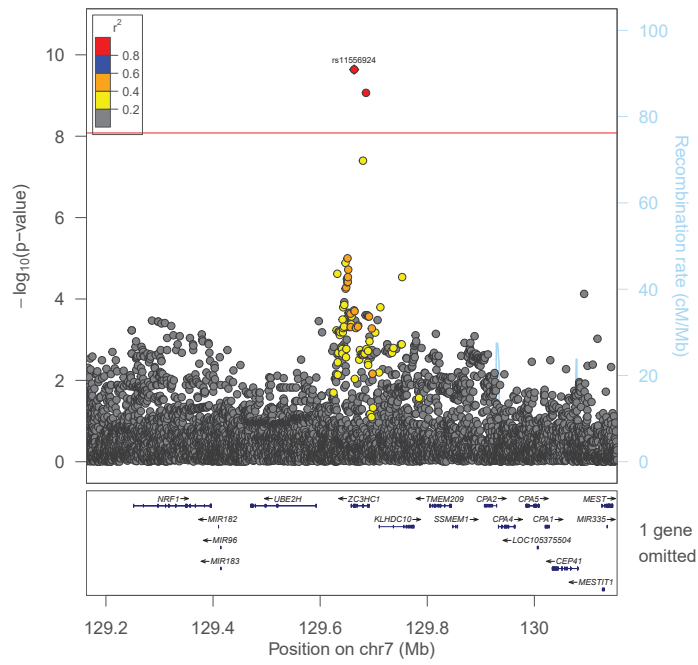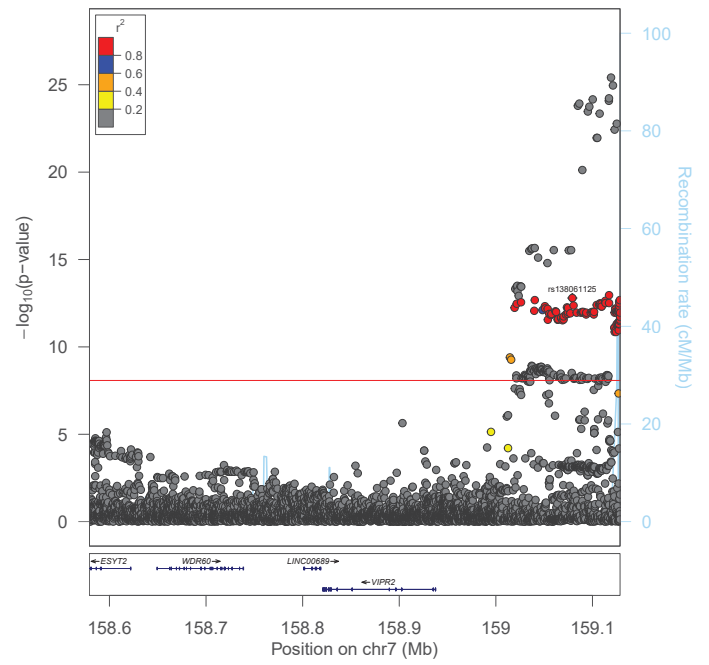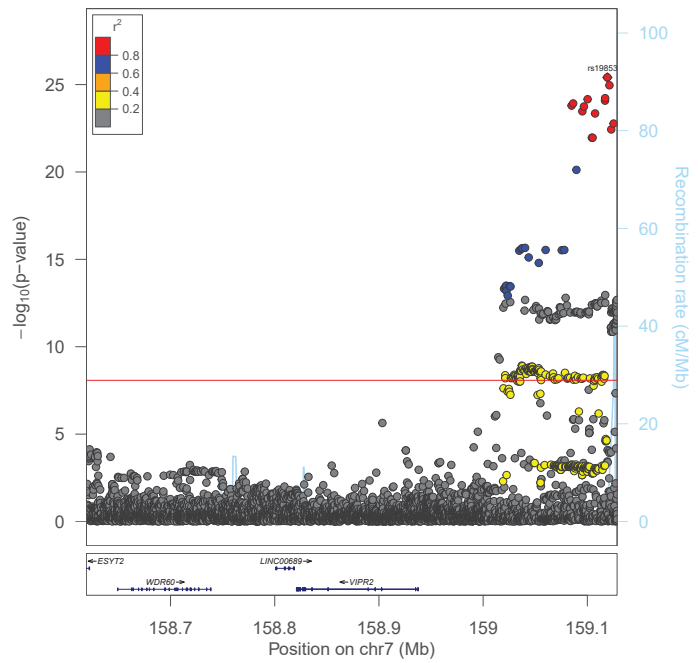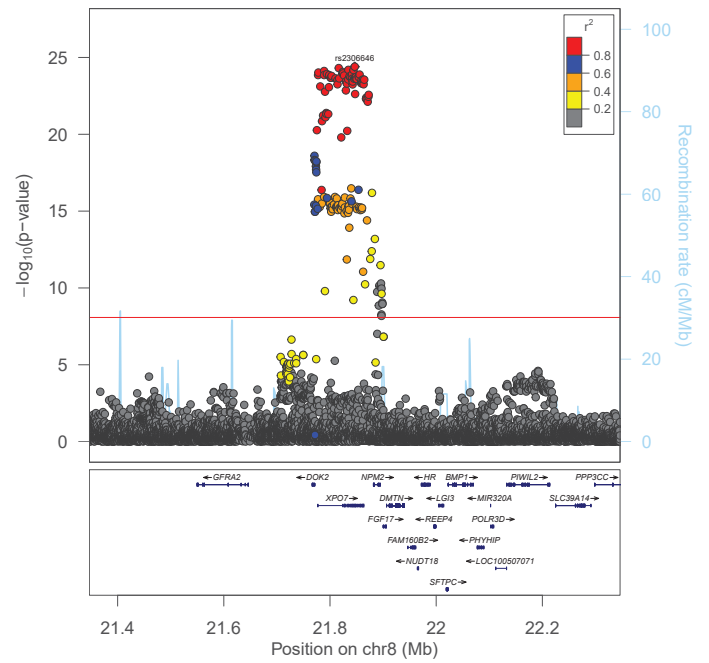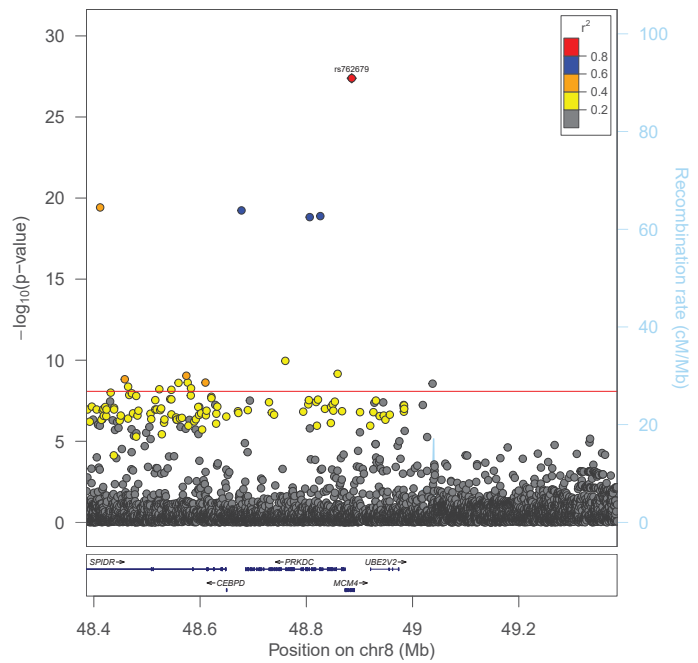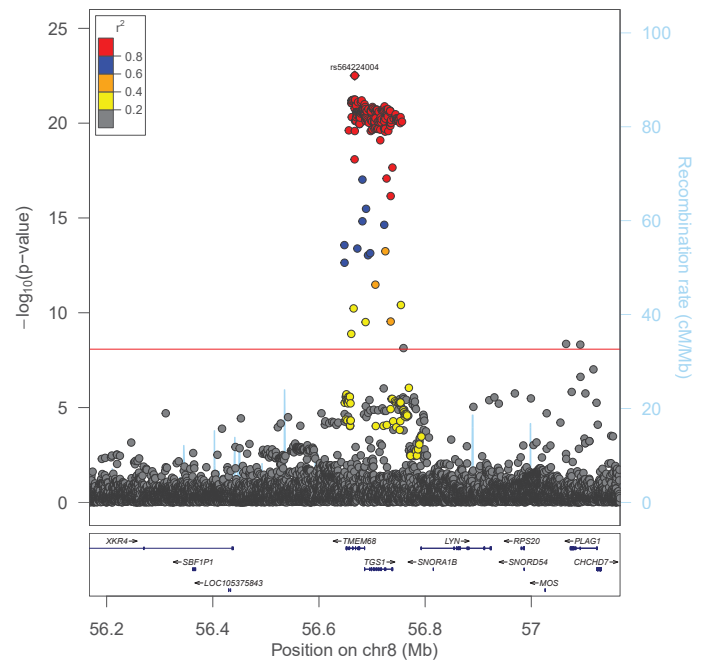

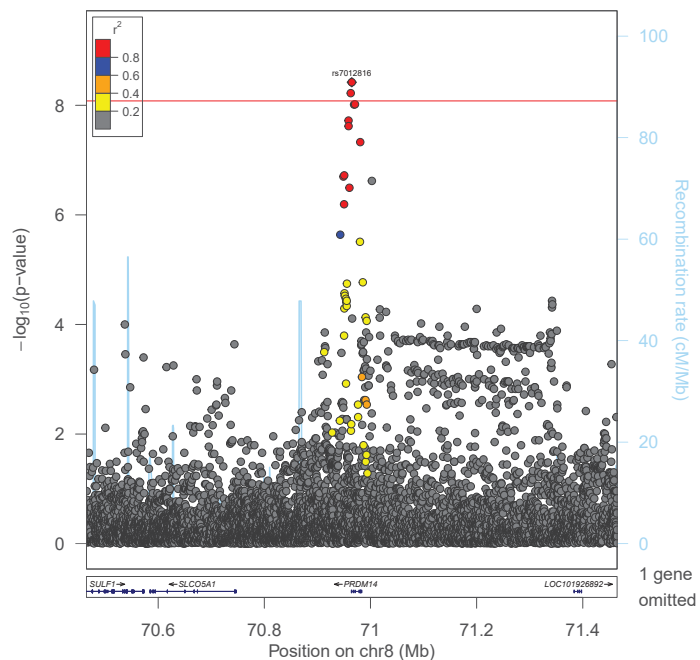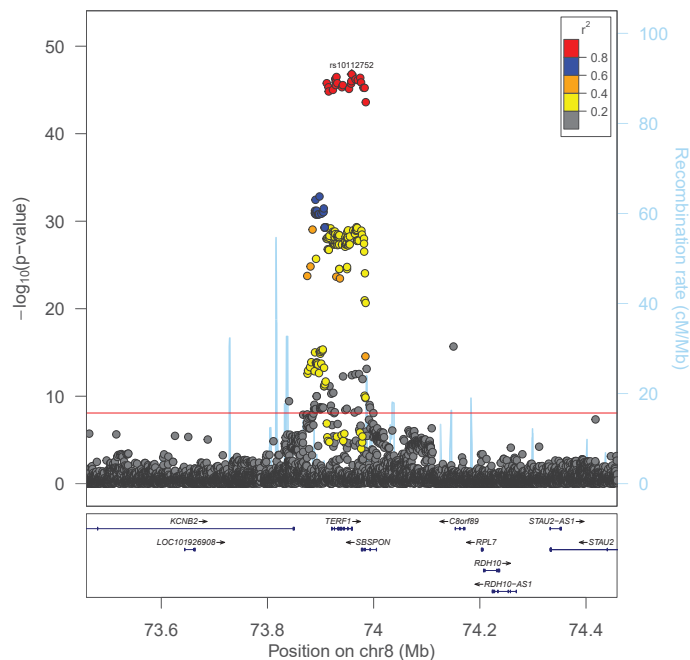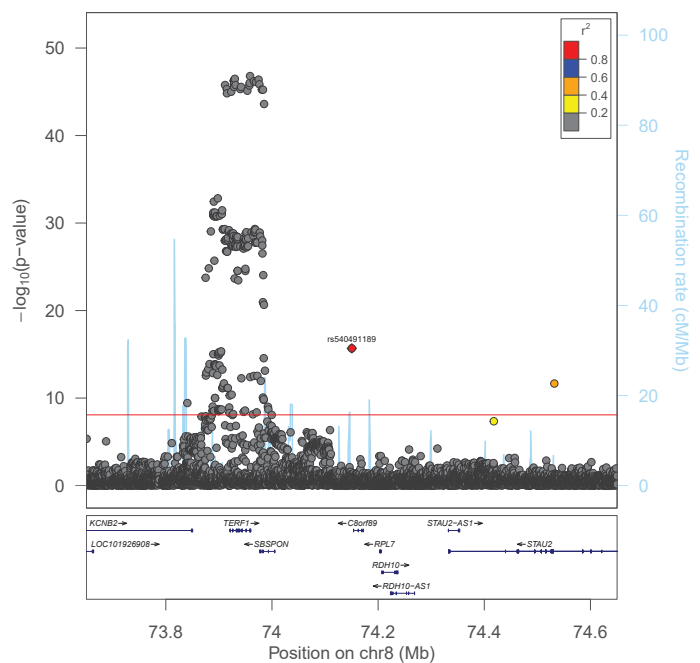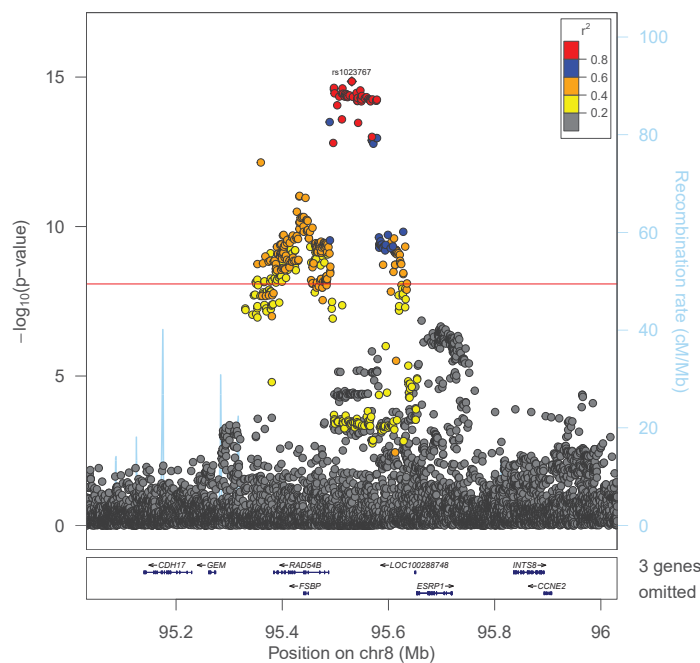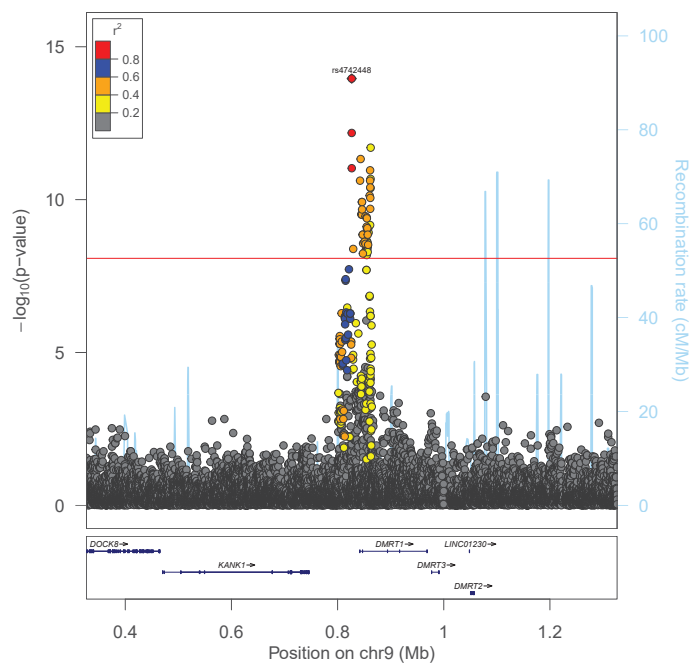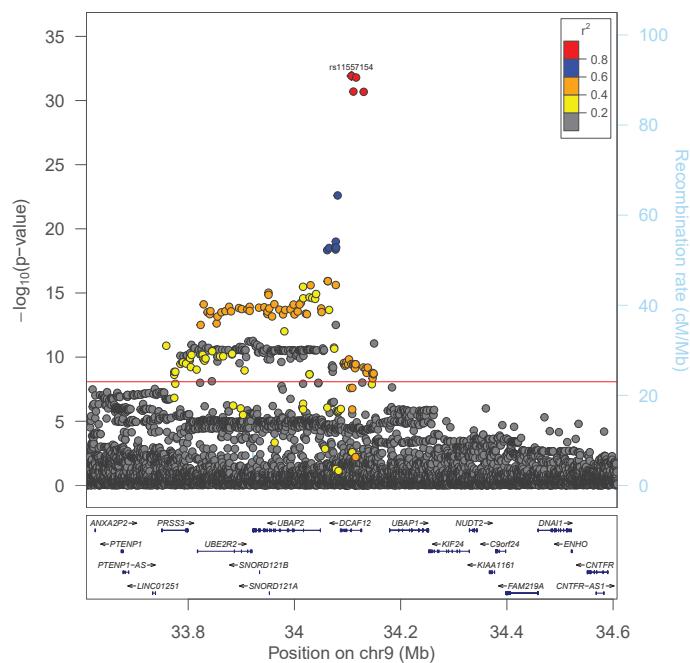

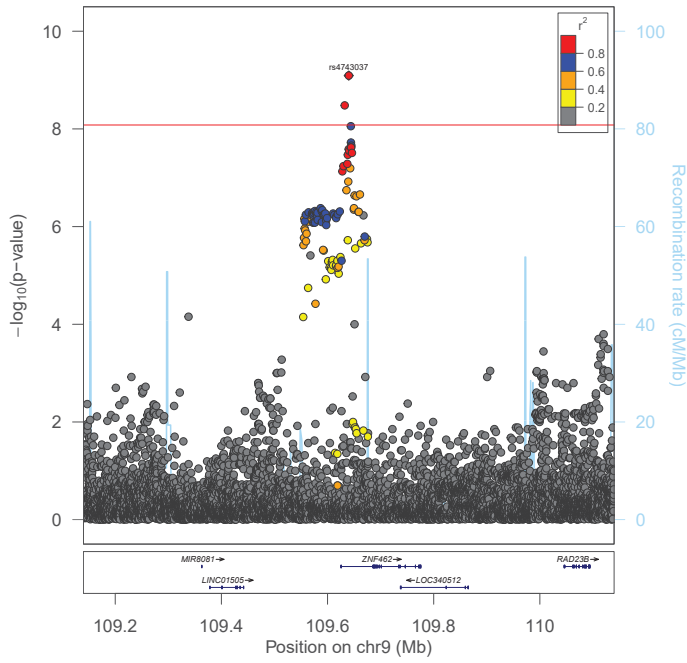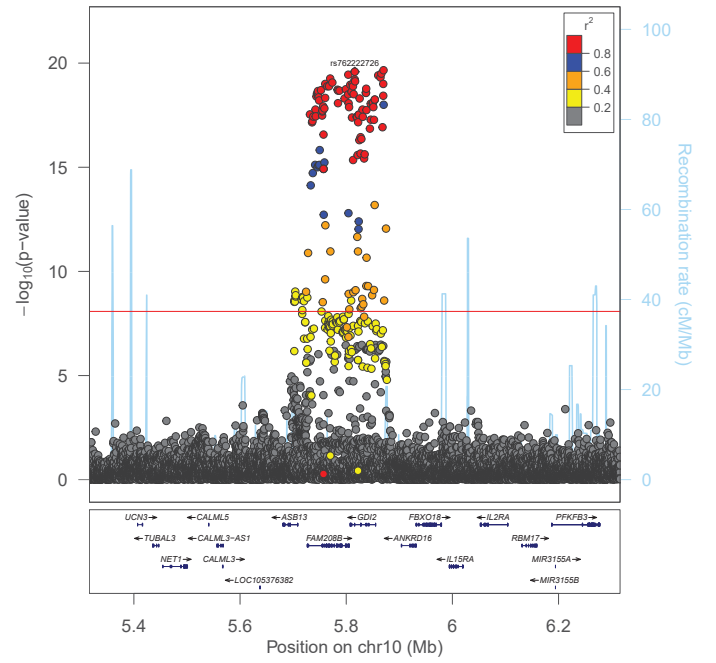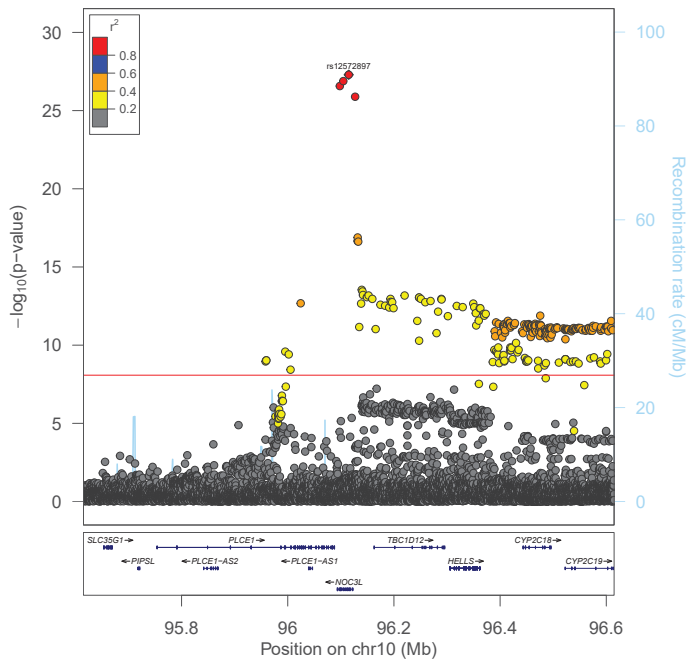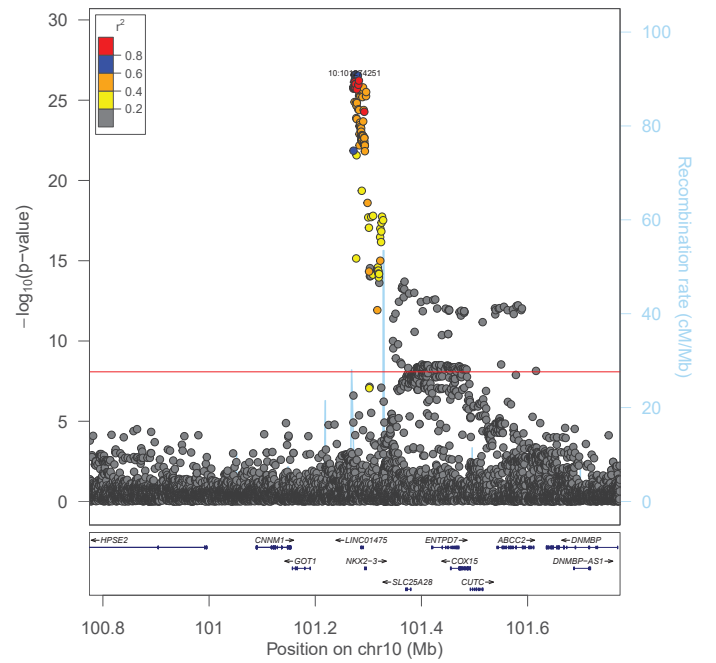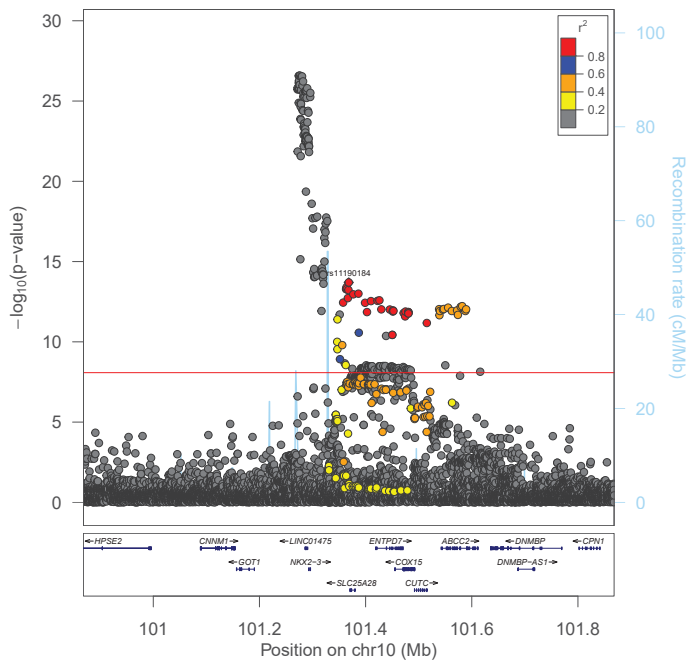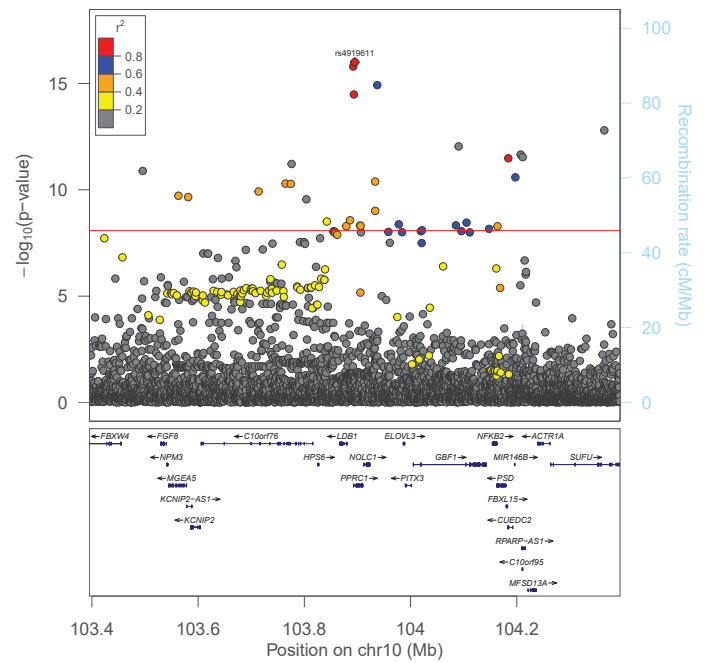

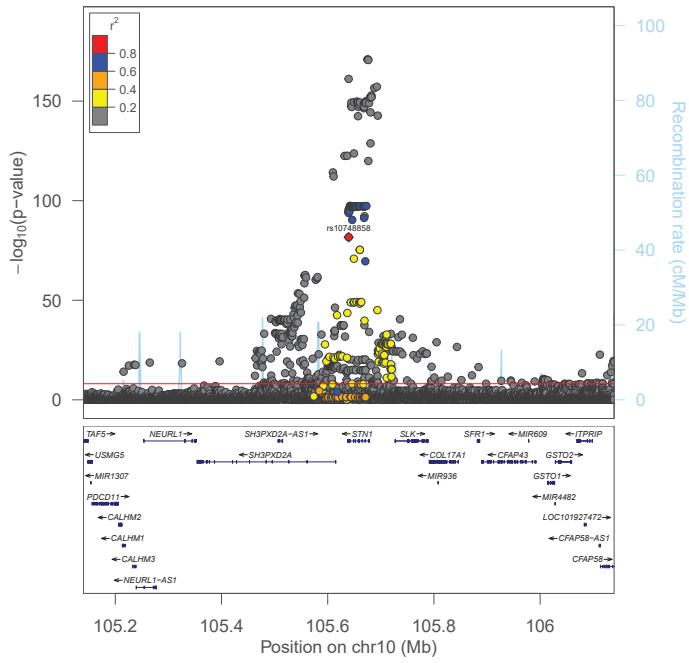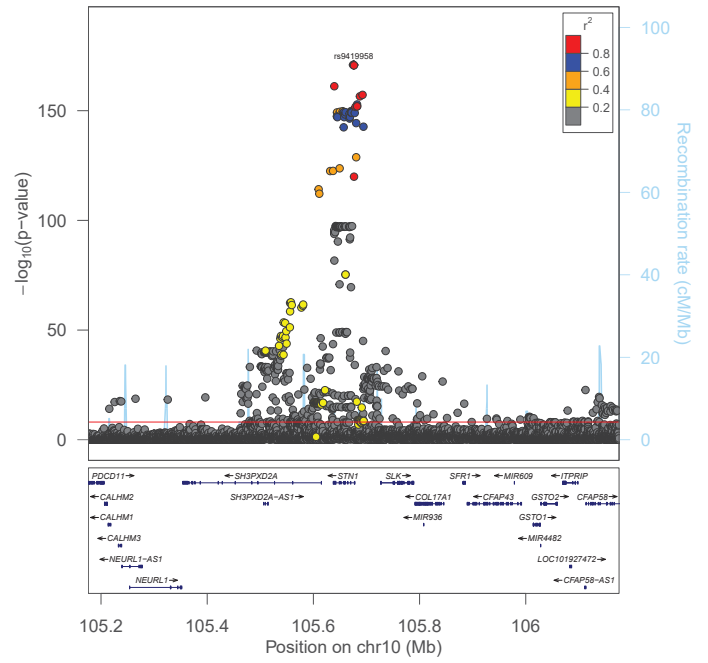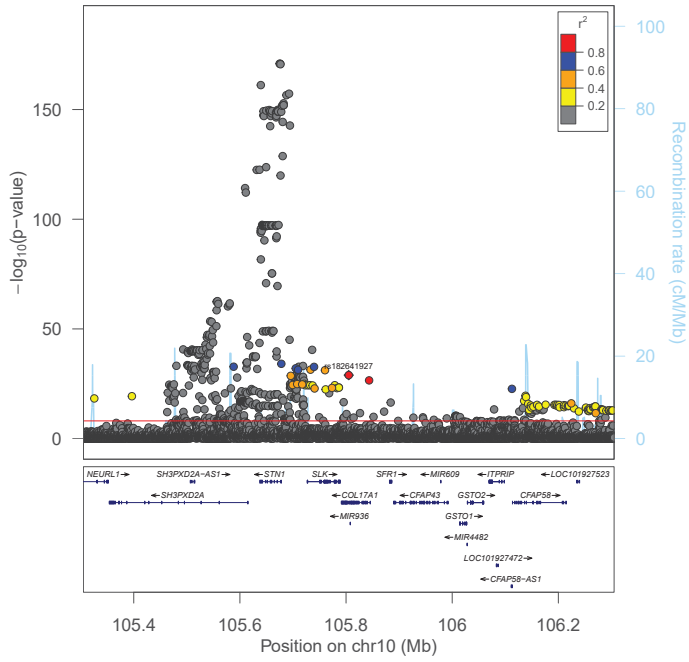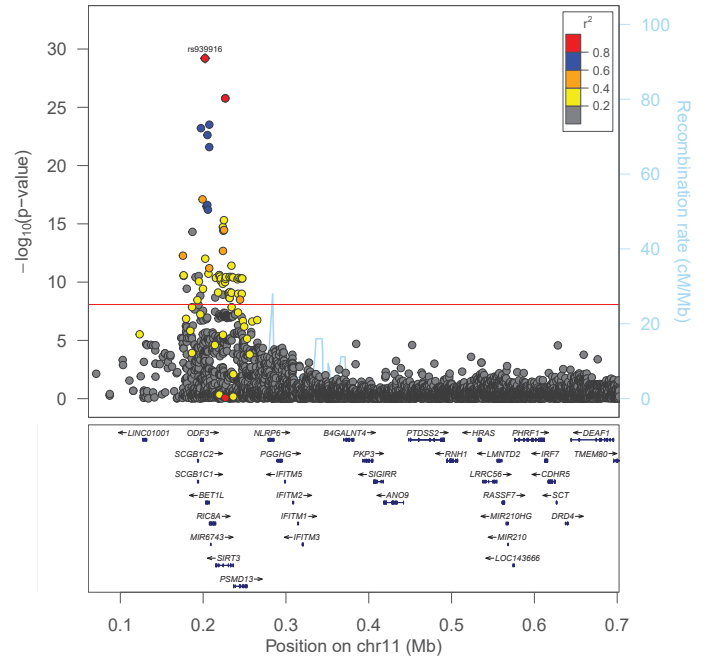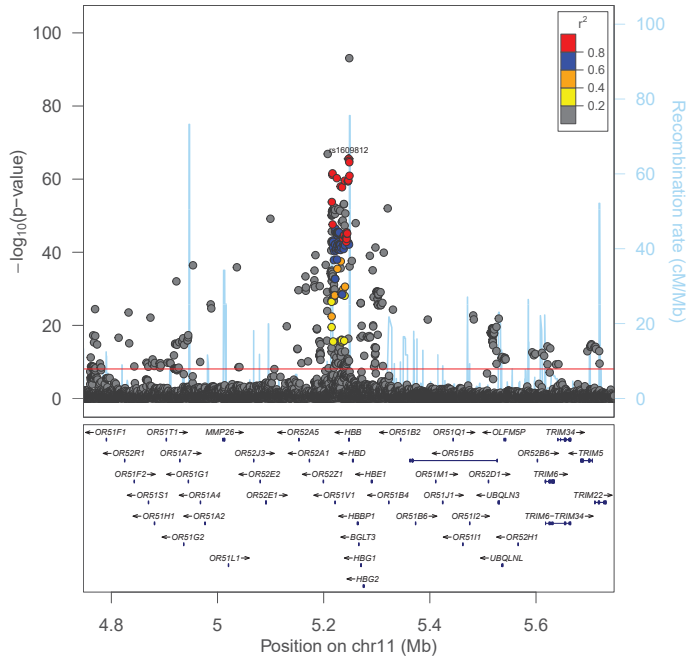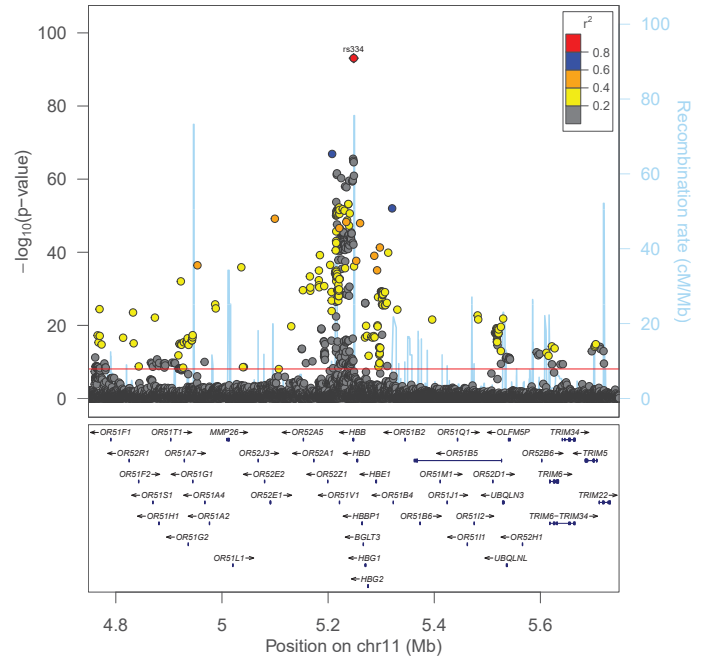



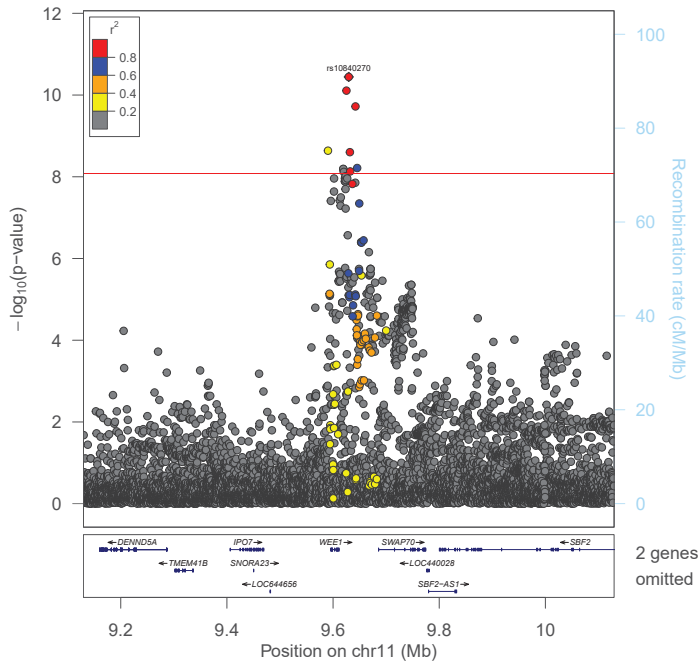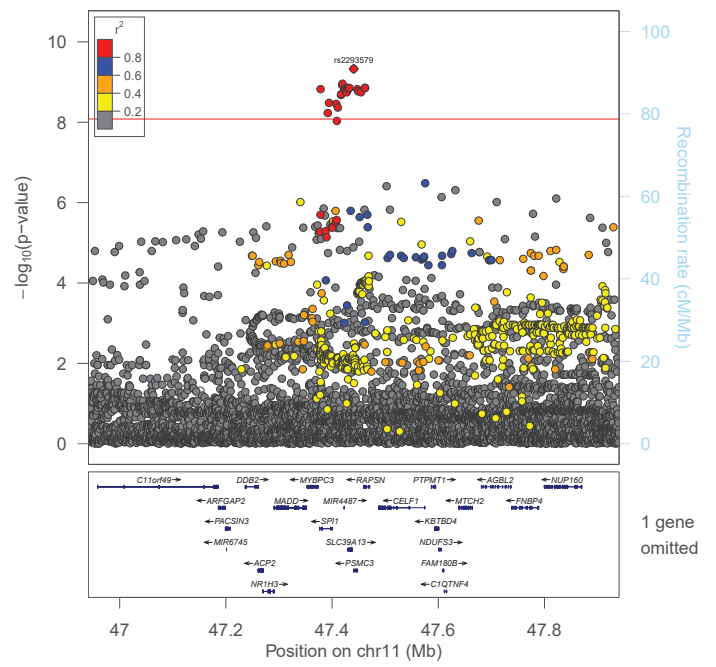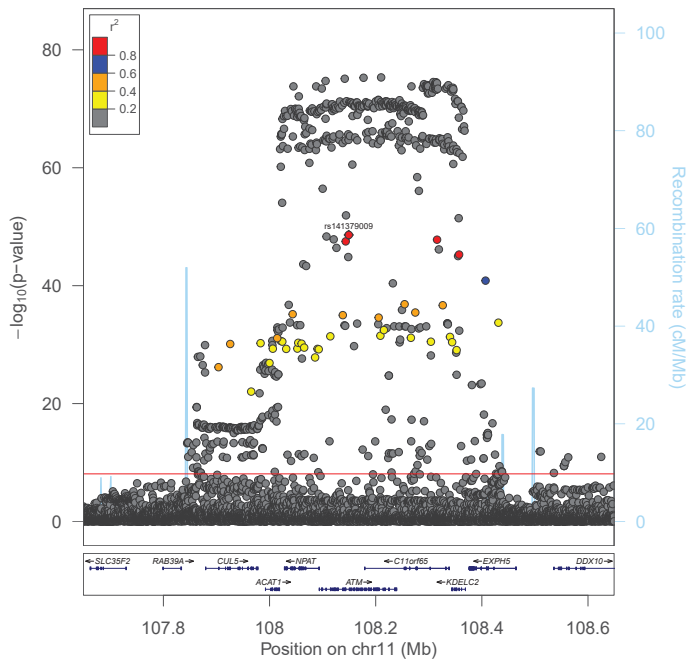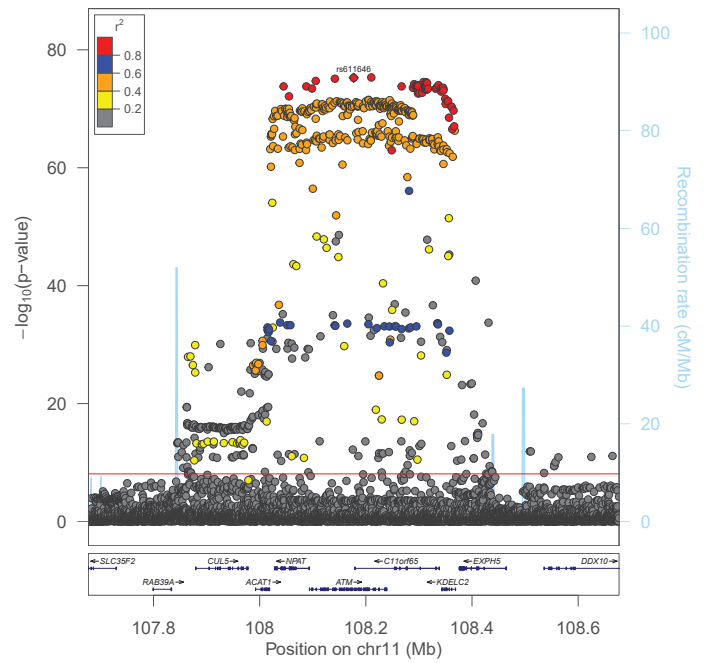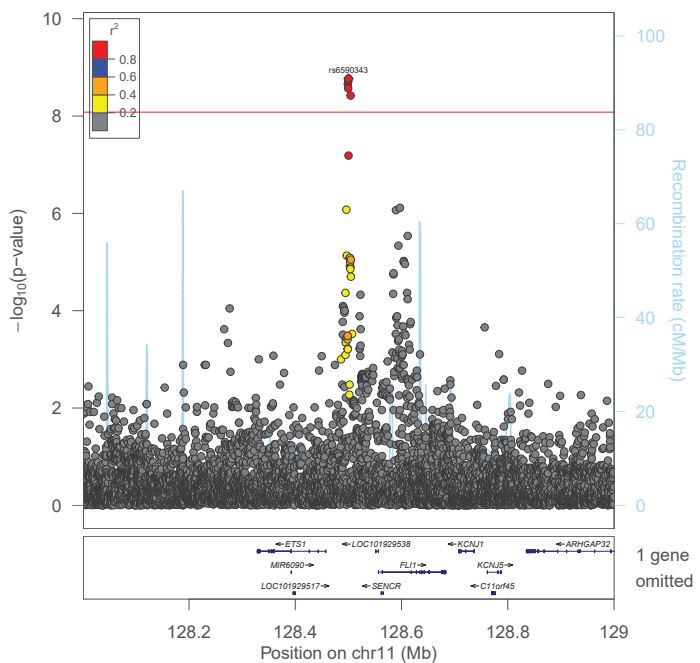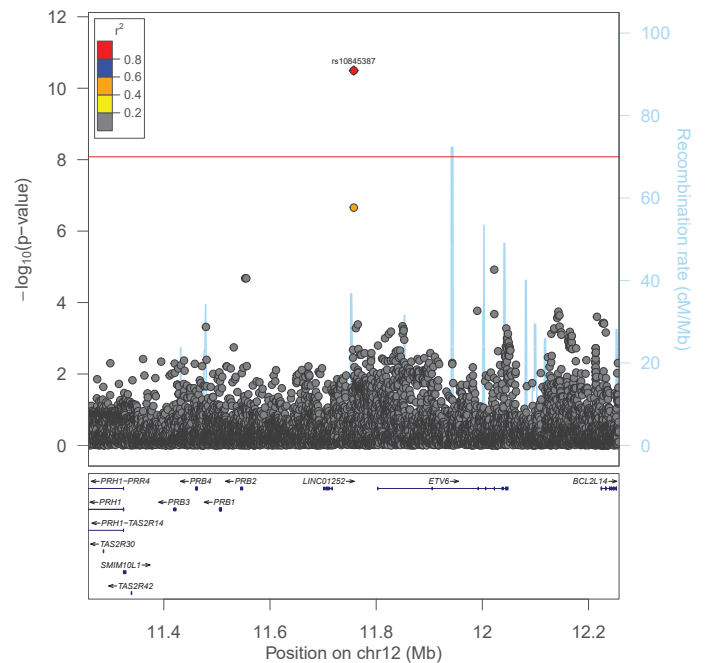

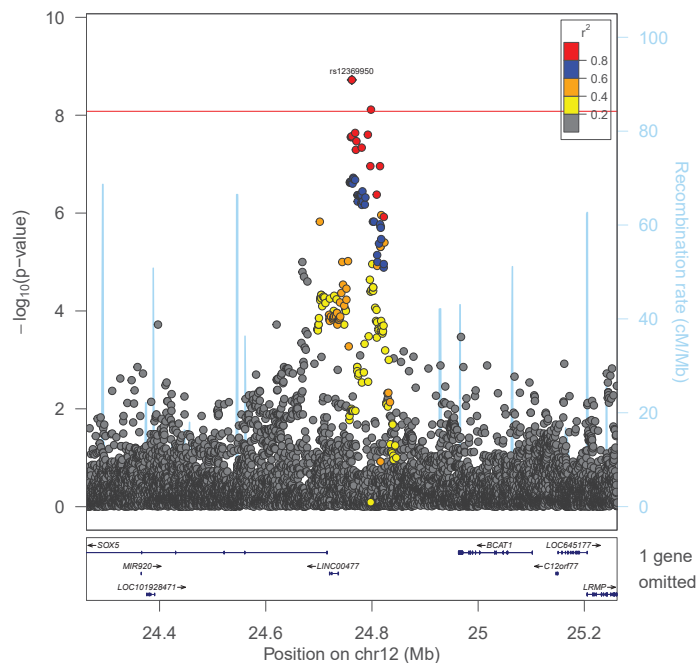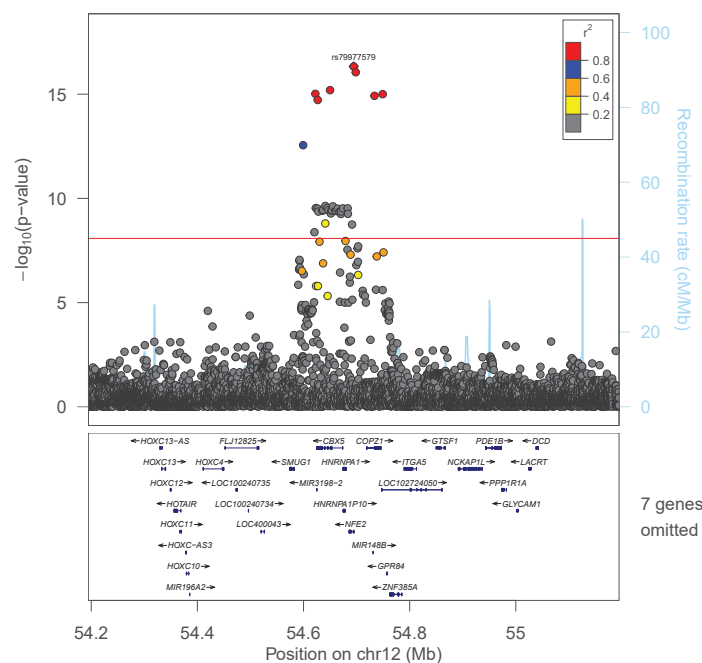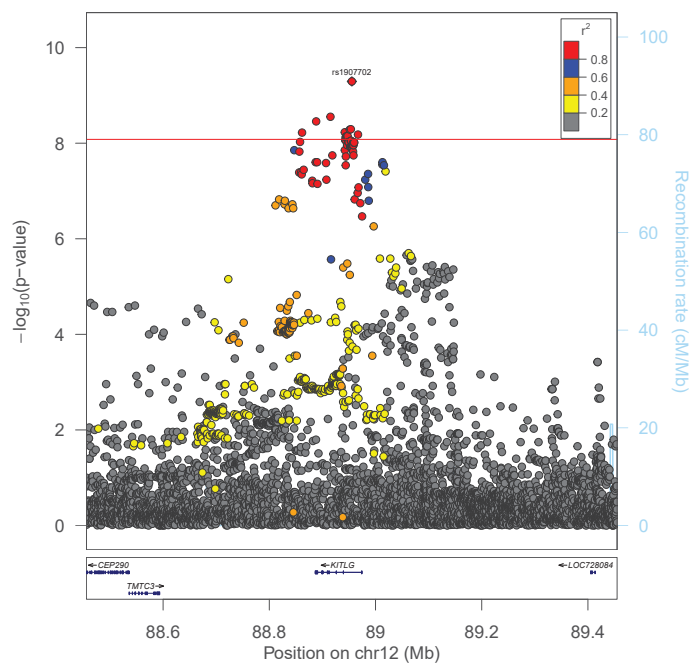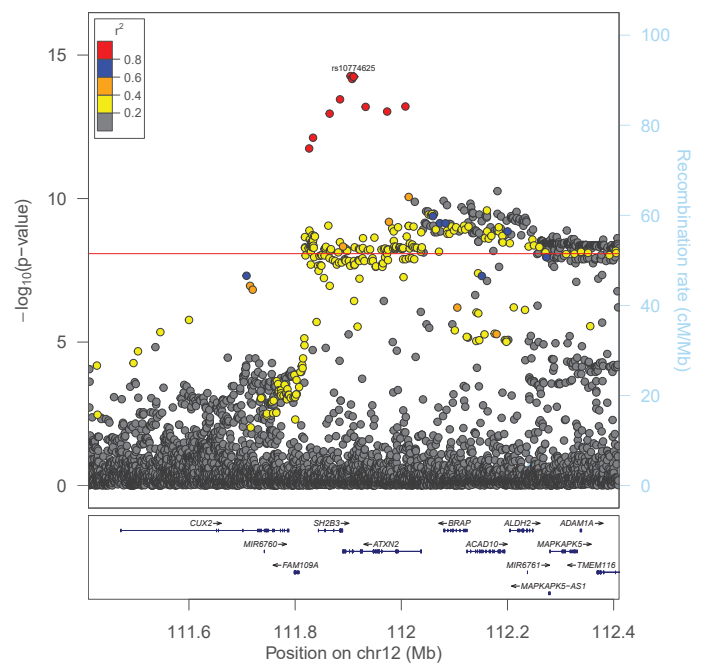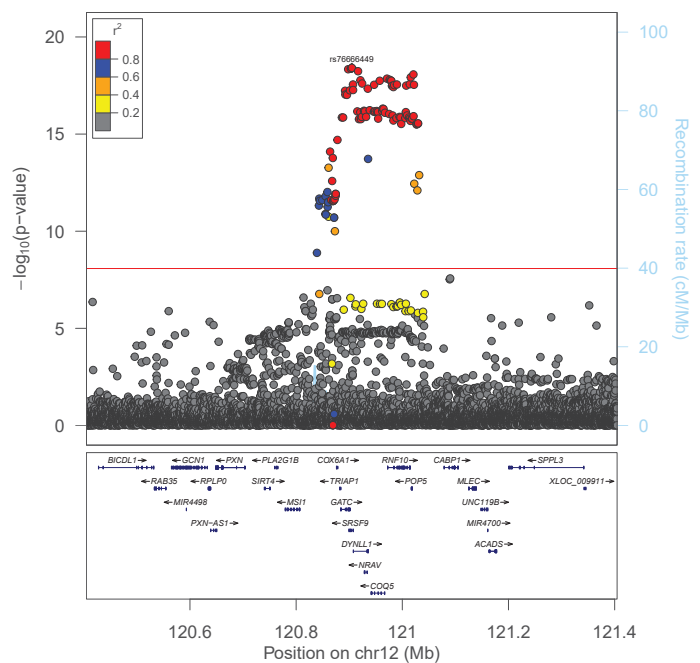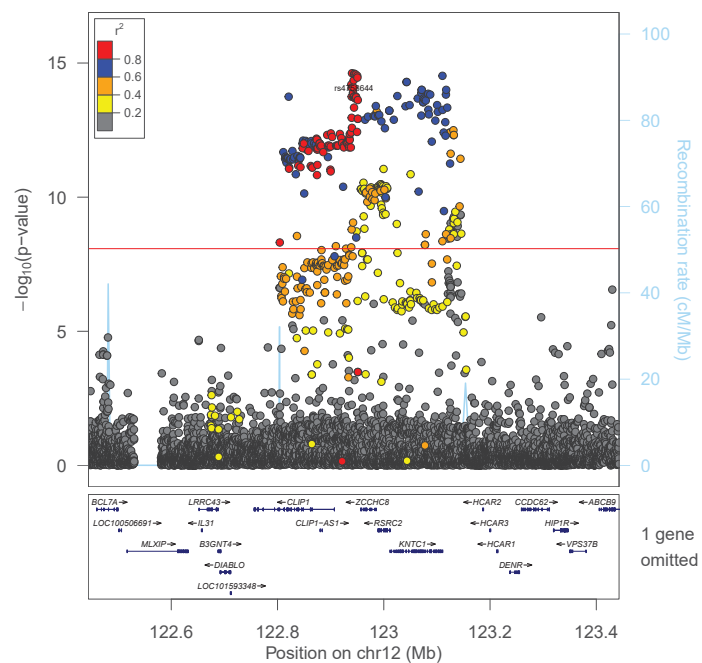

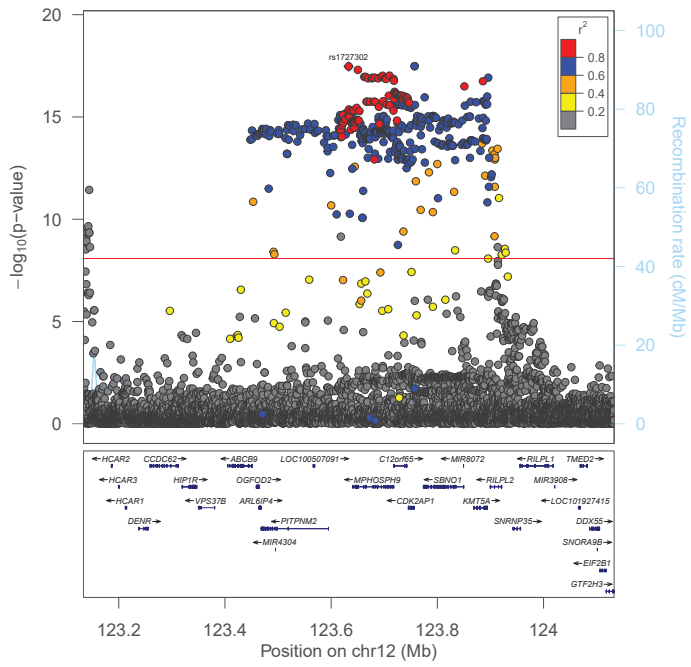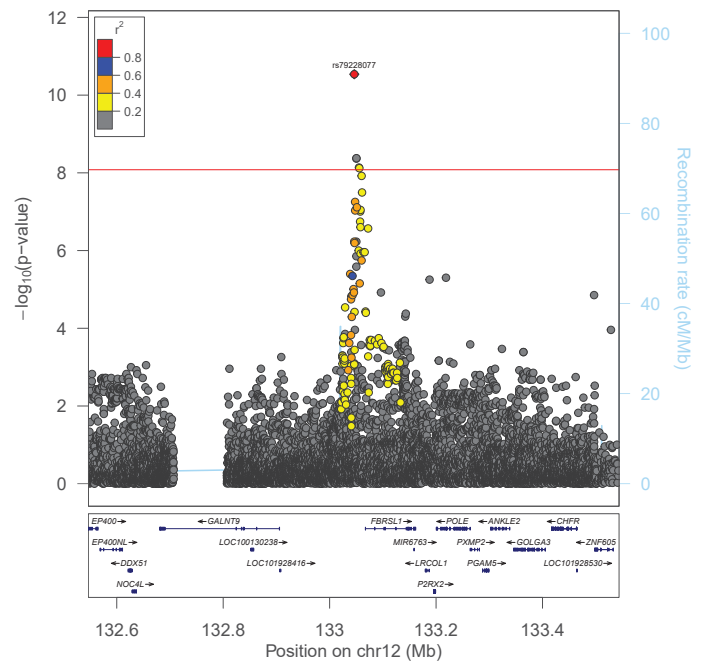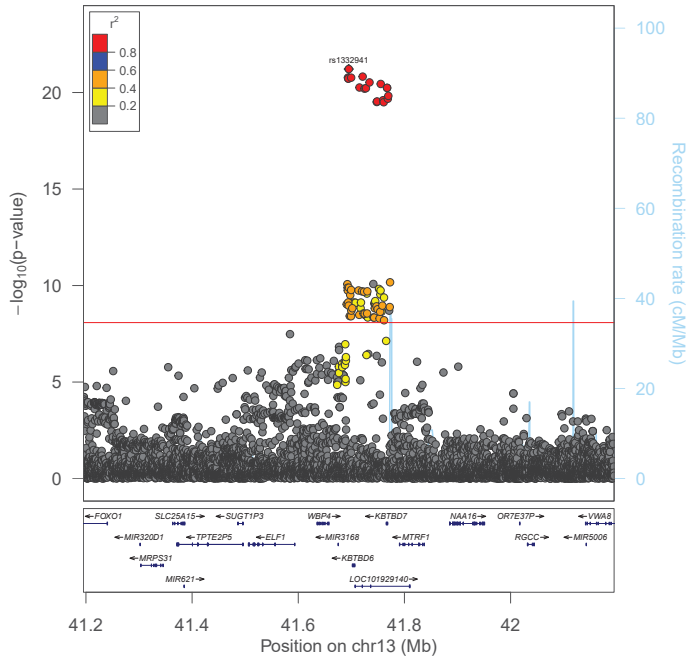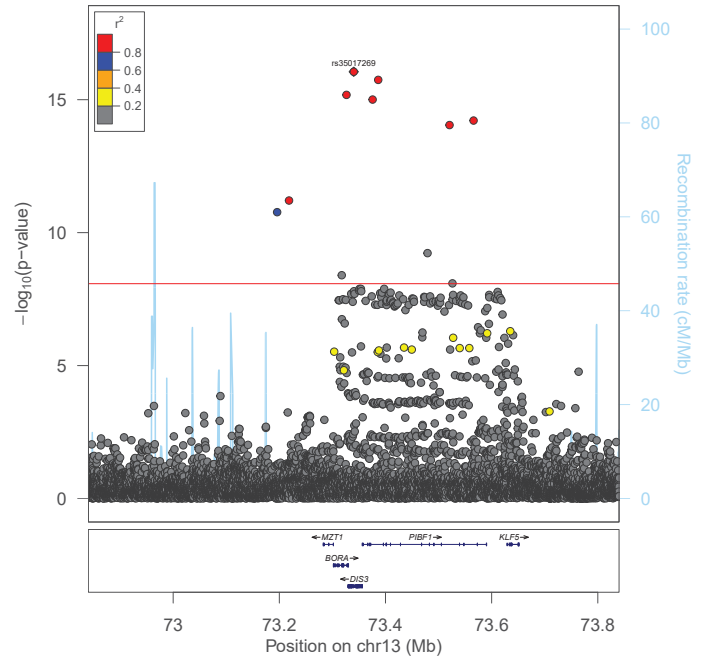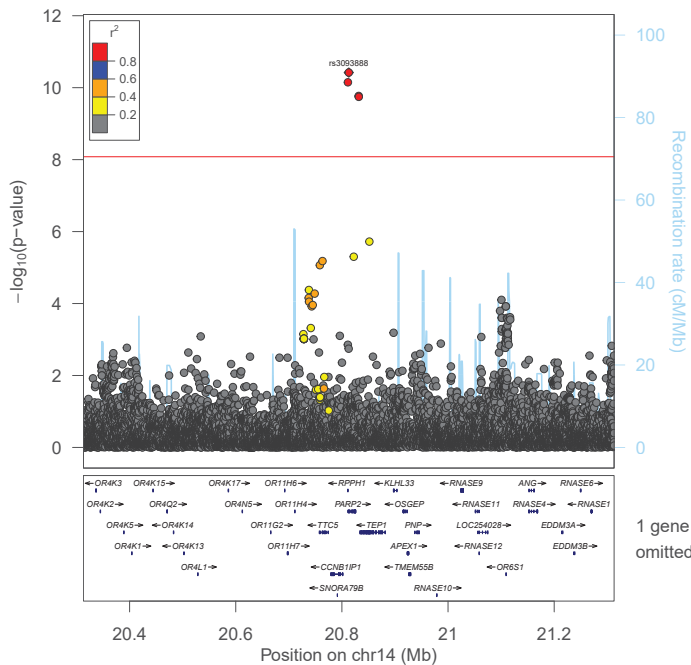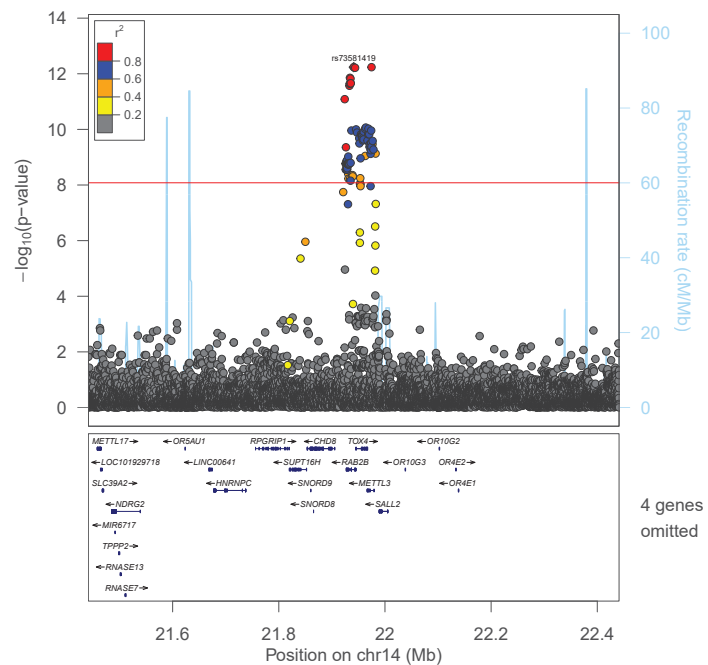

1 gene omitted

4 genes omitted

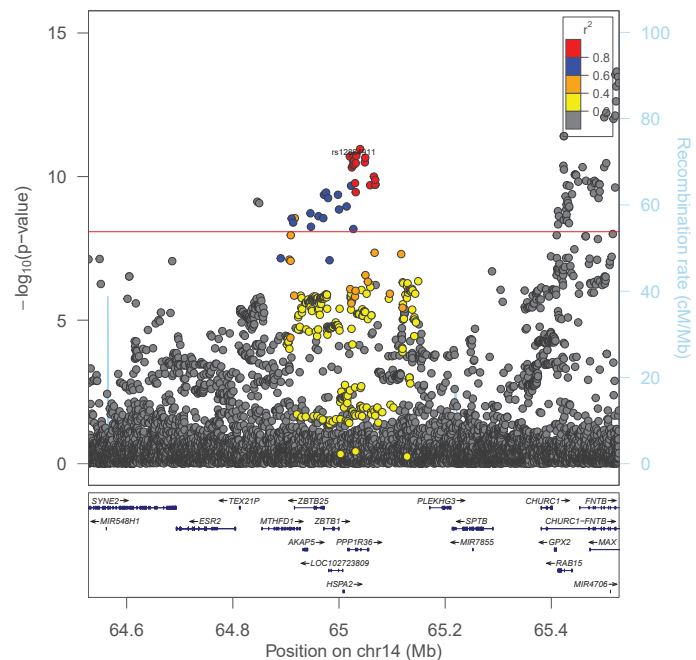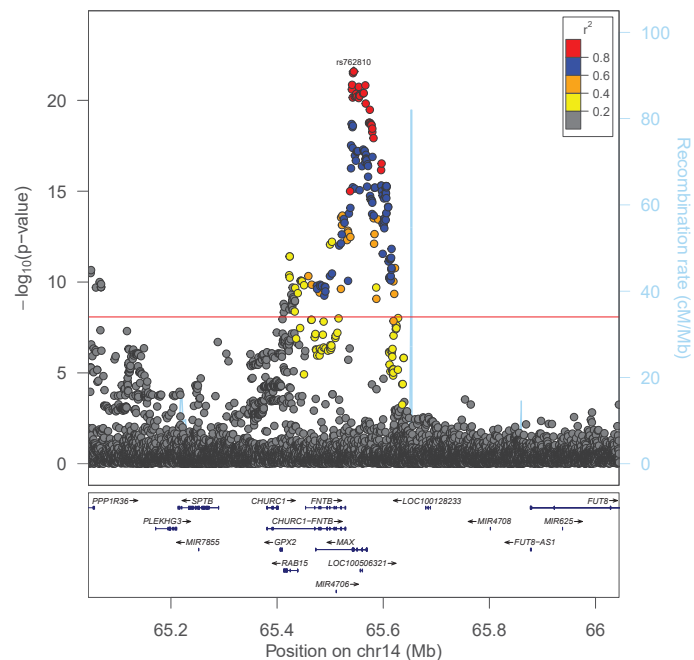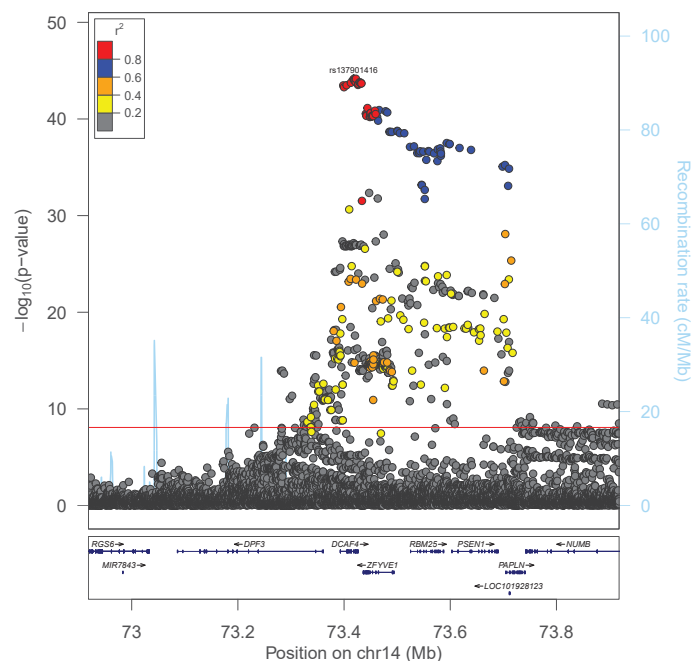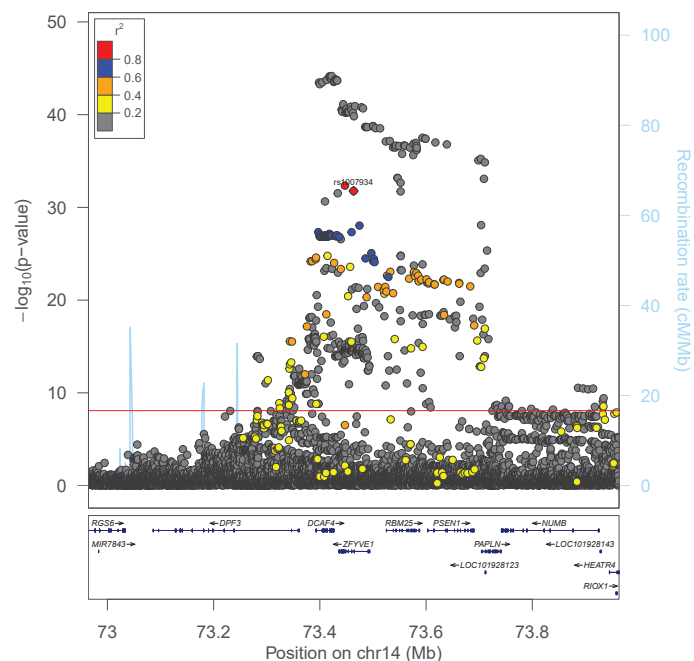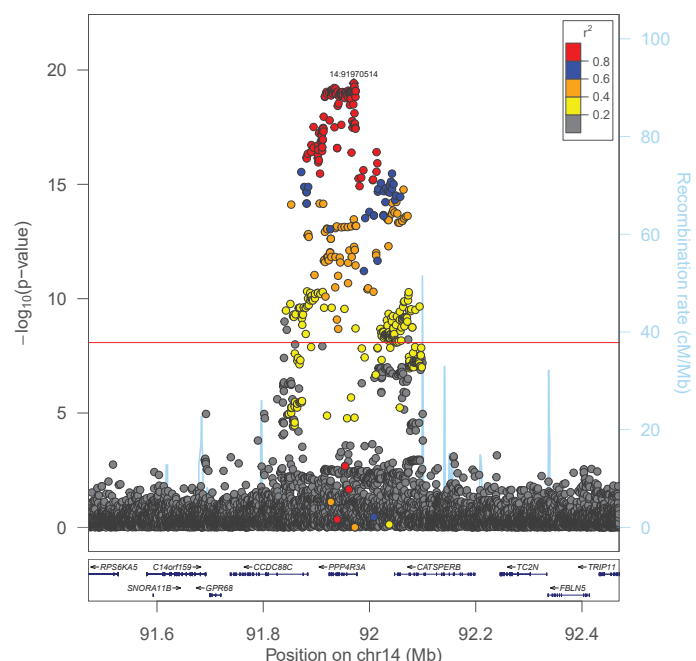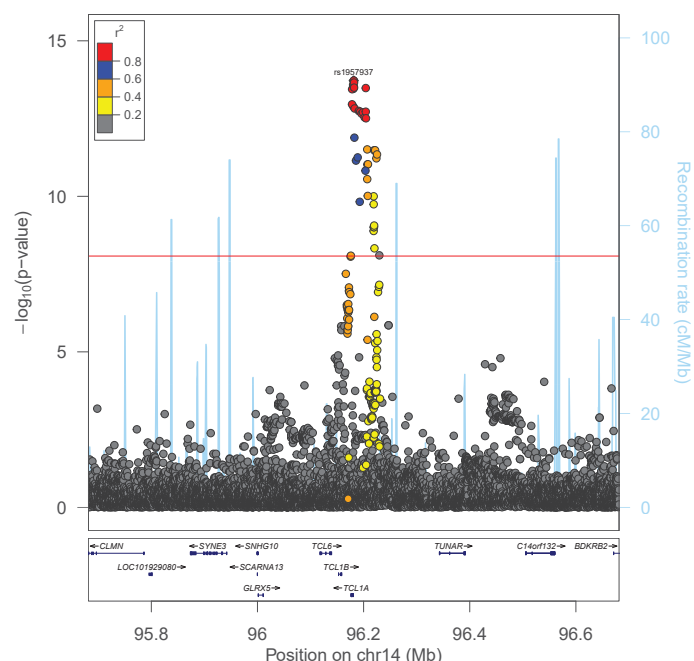



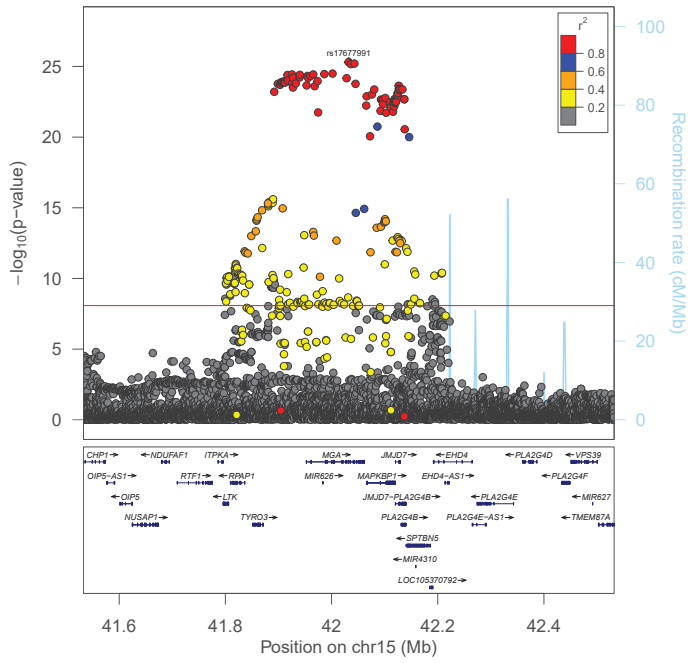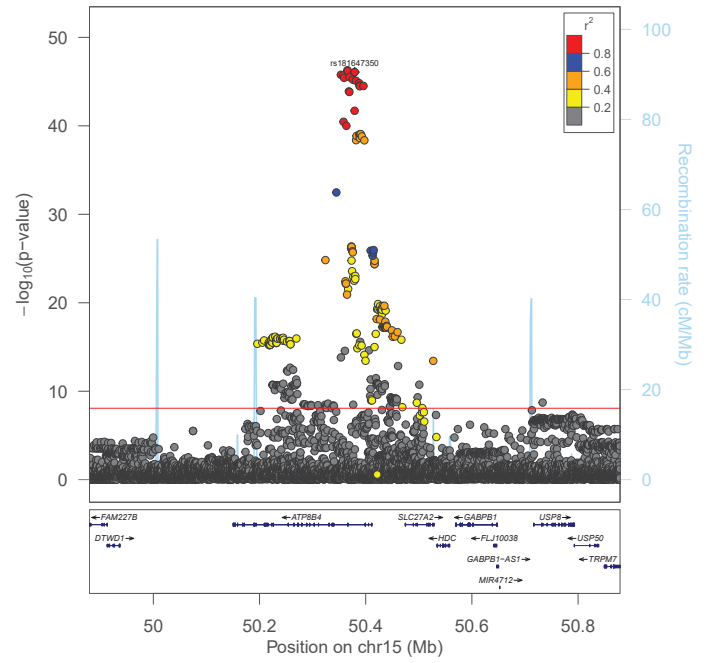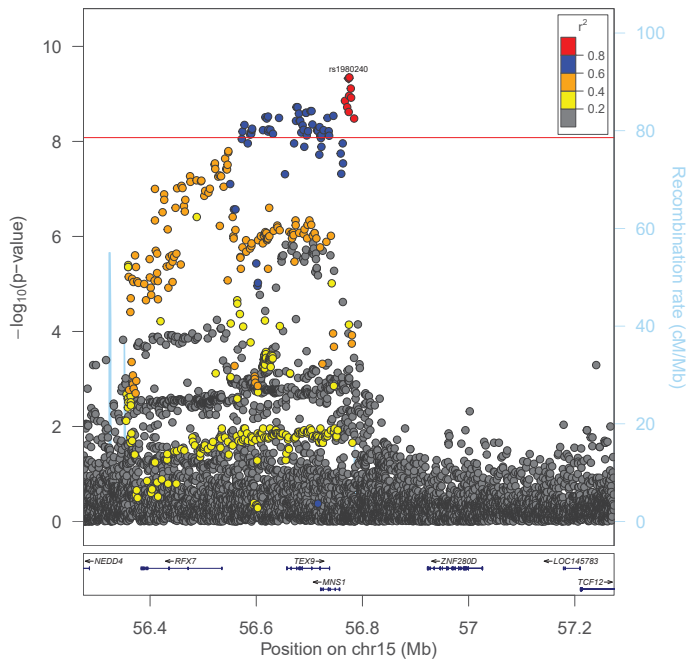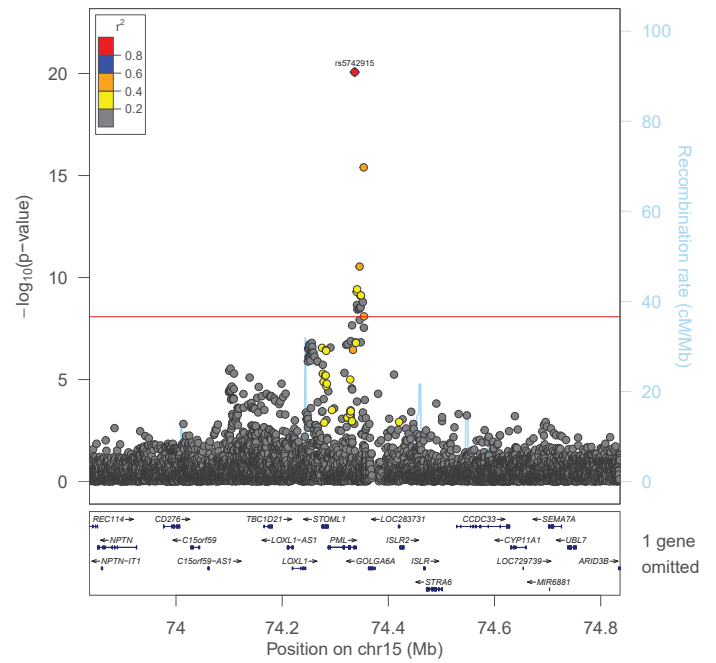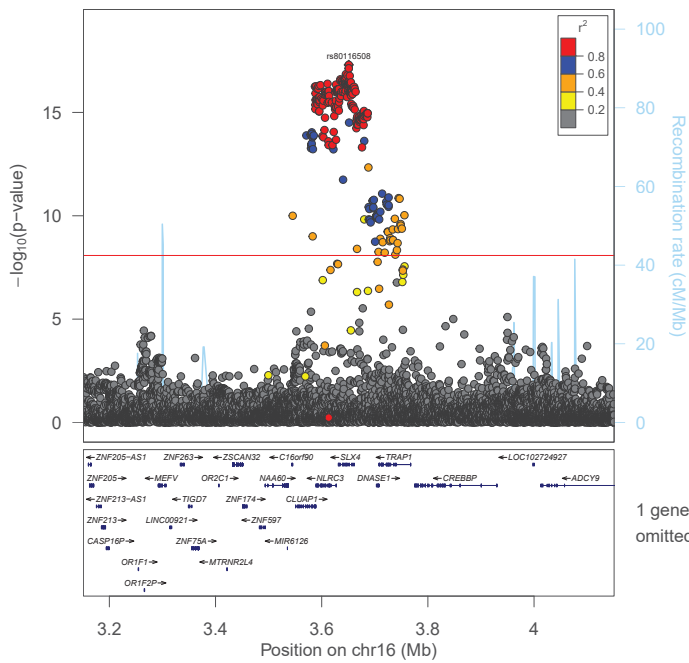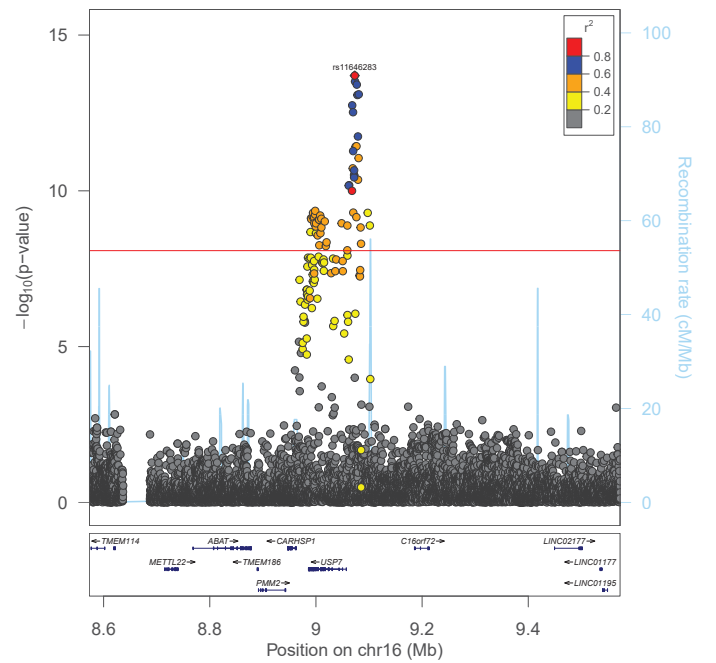

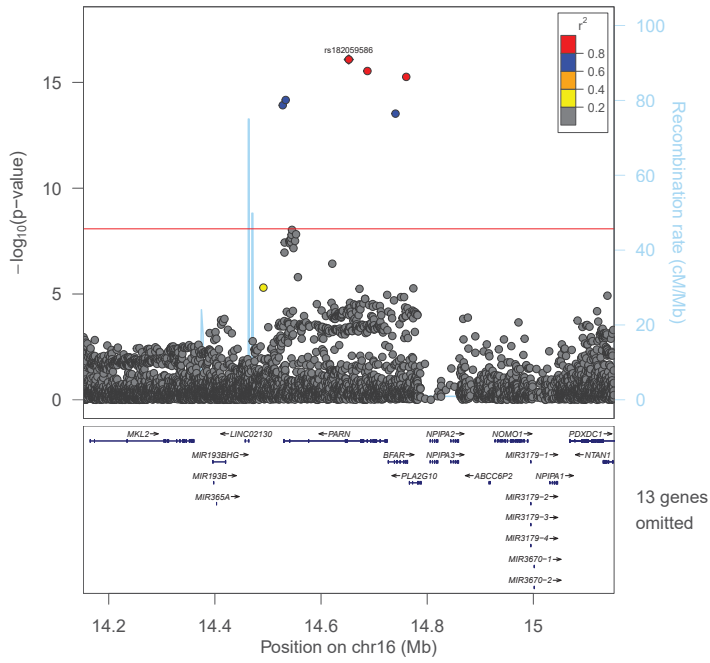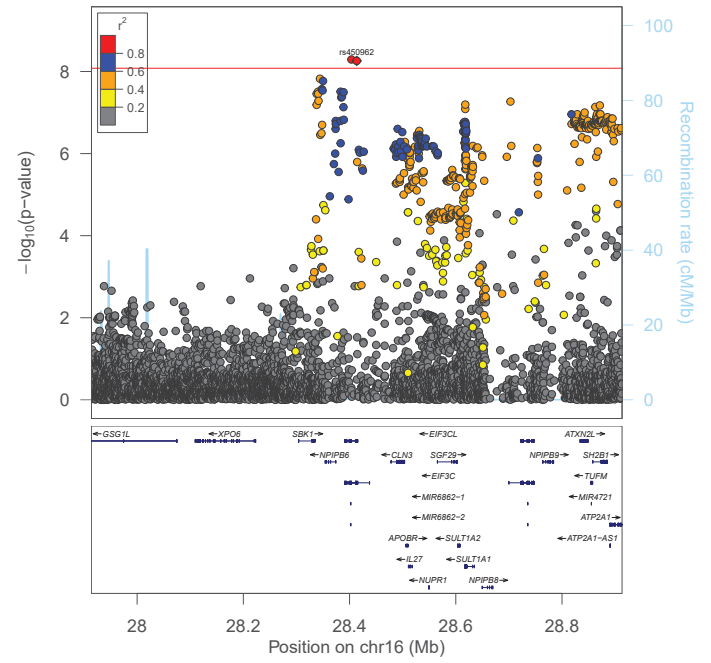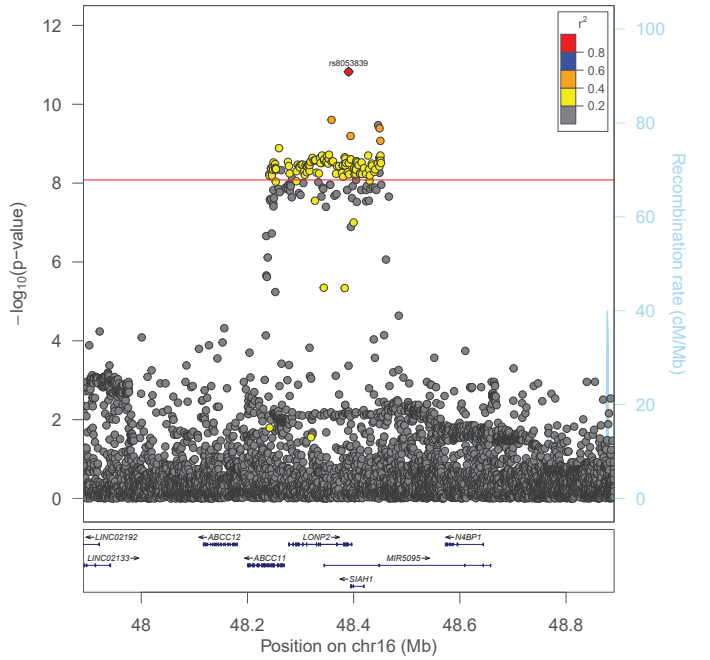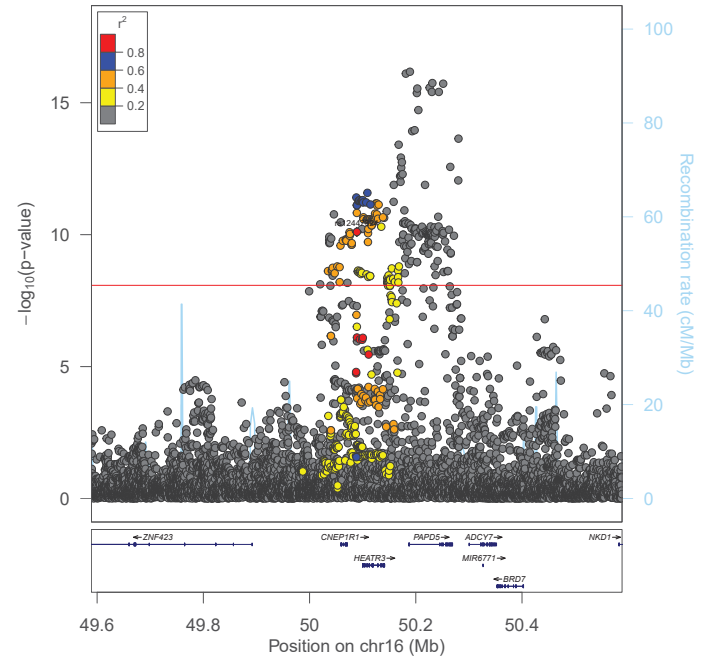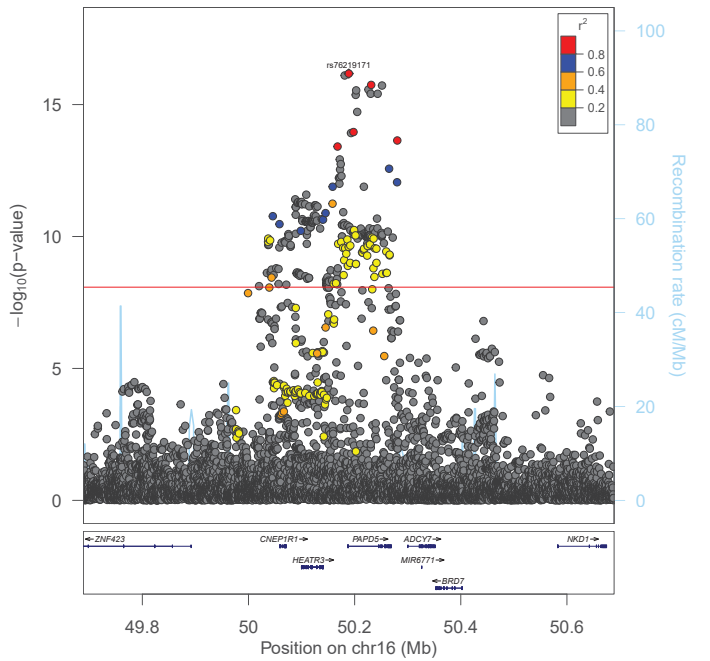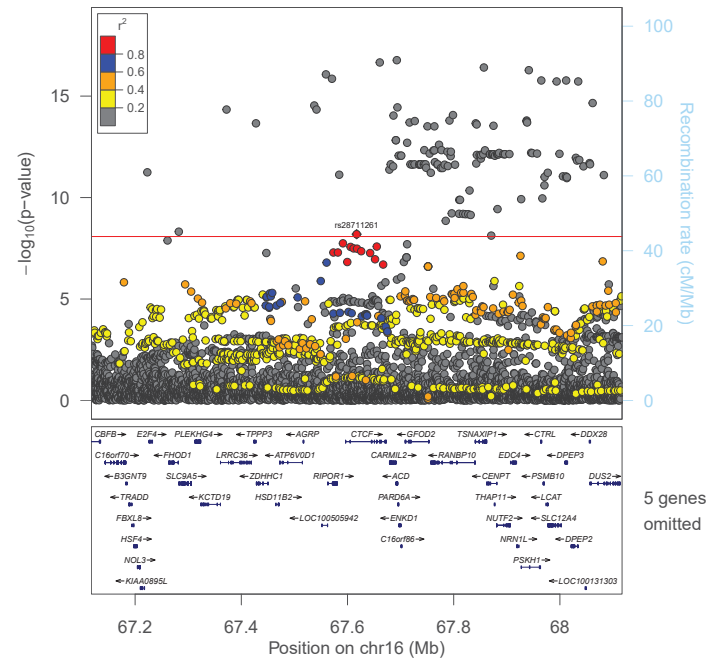

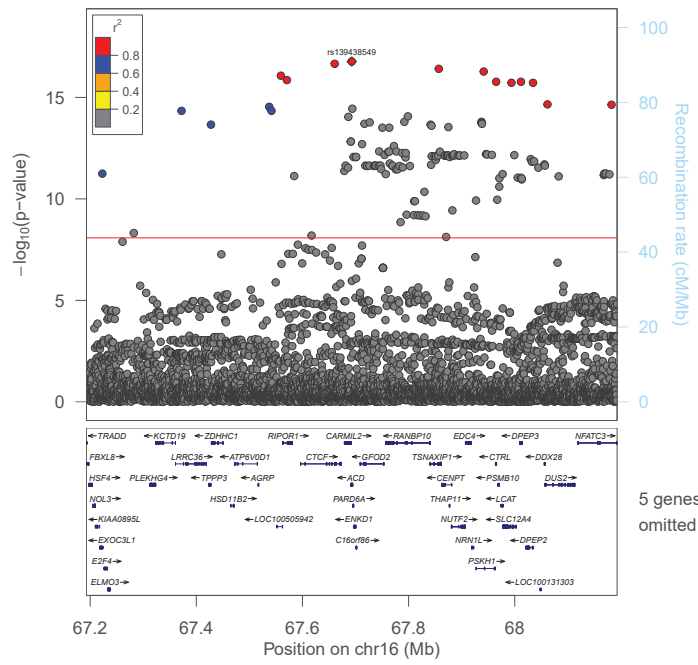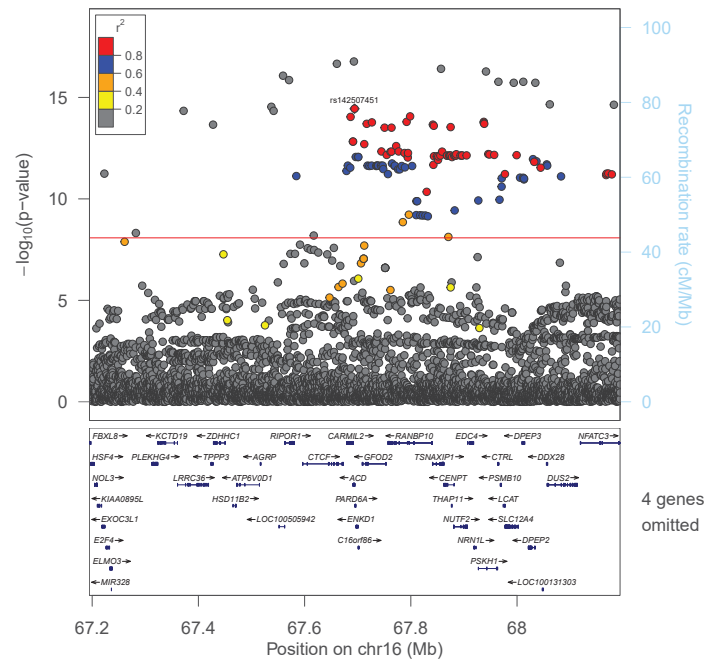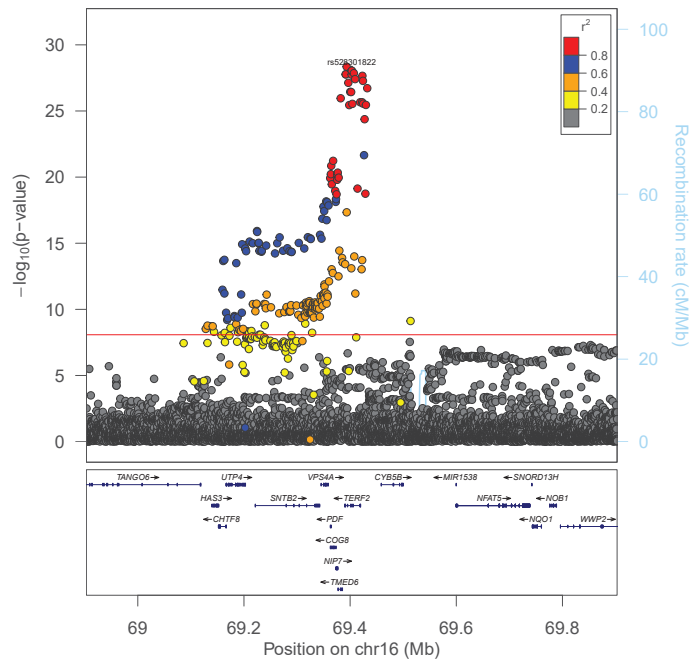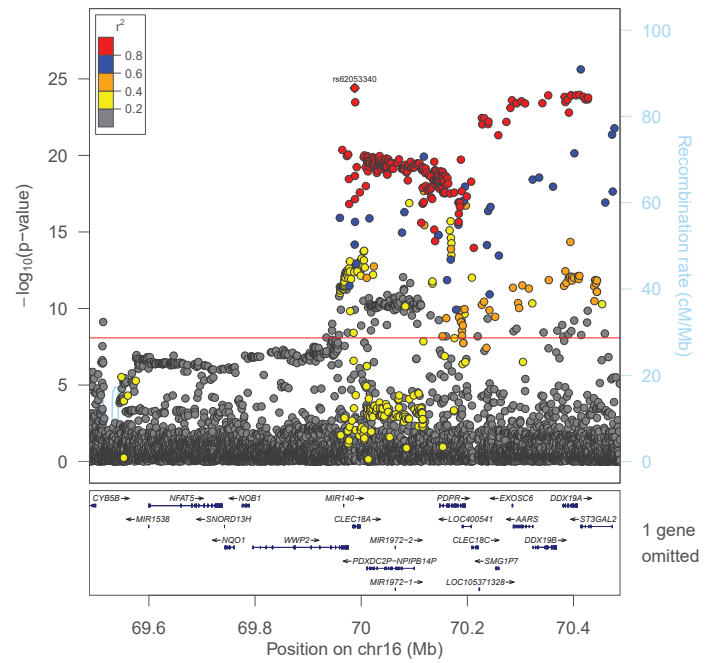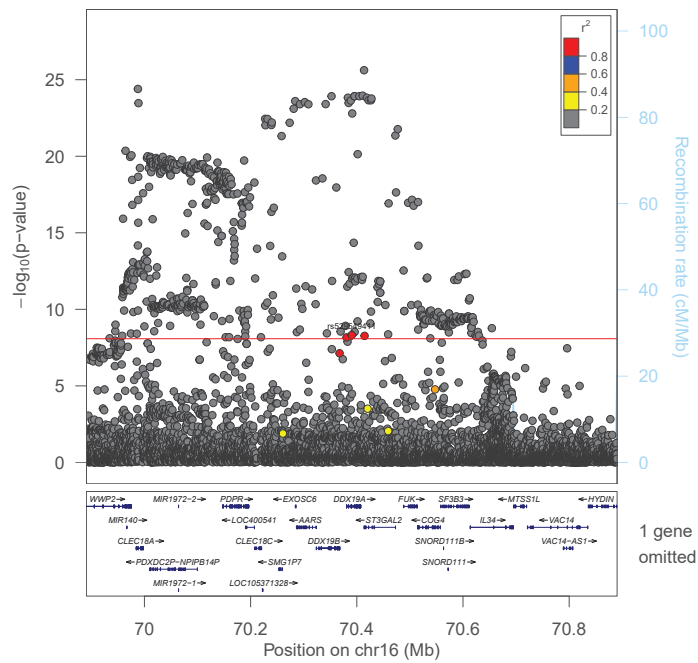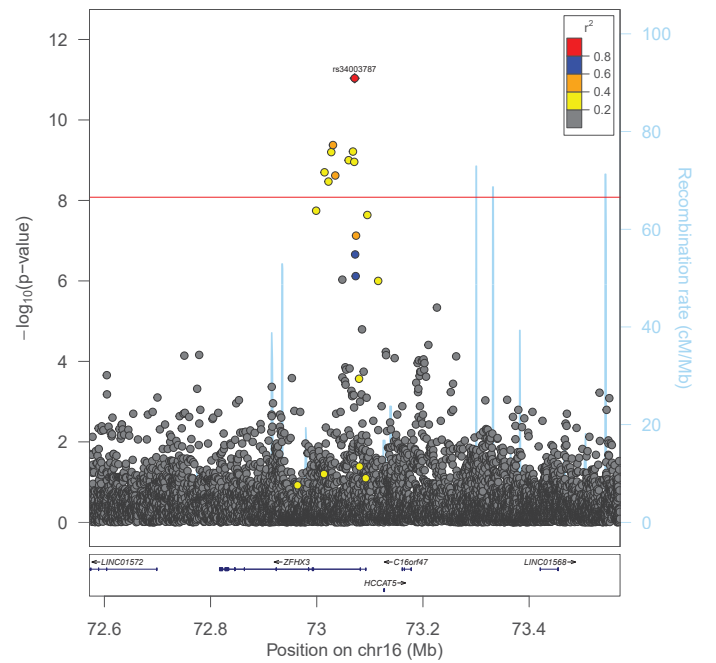

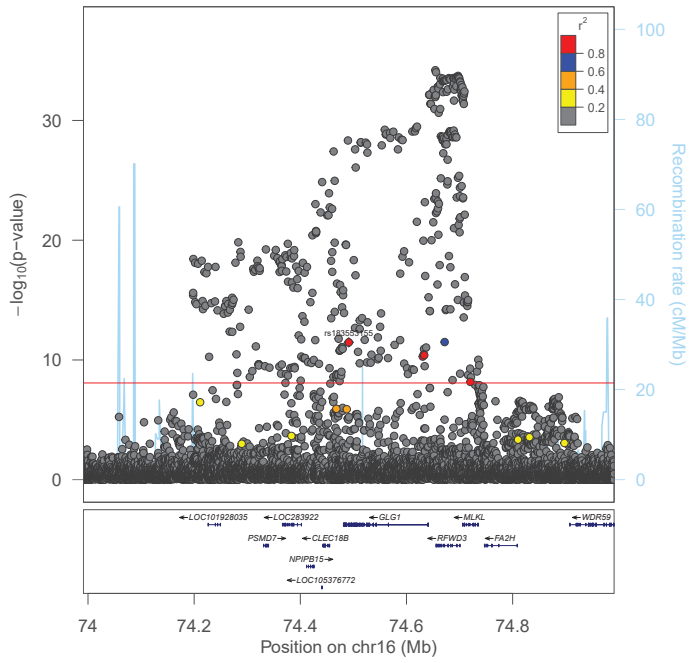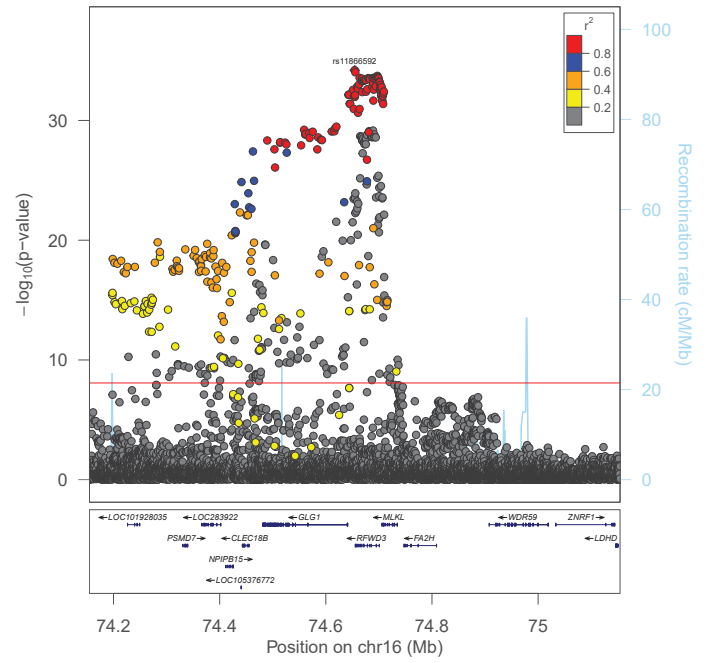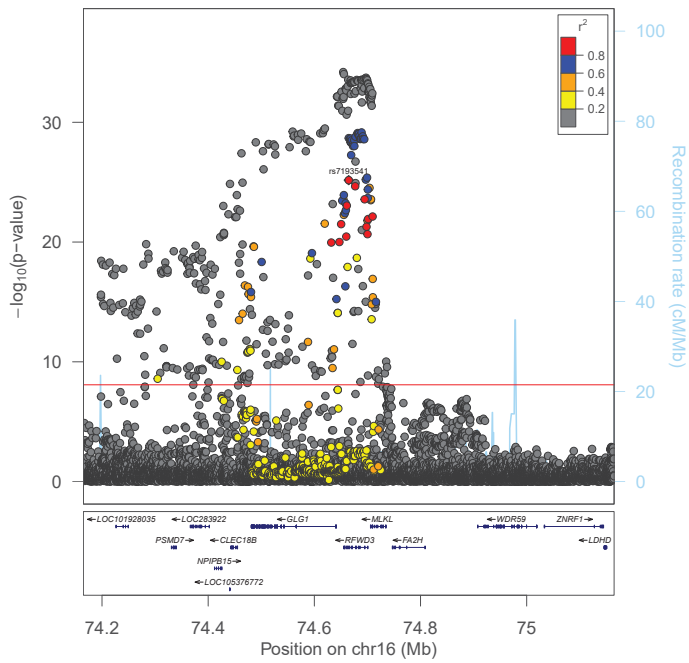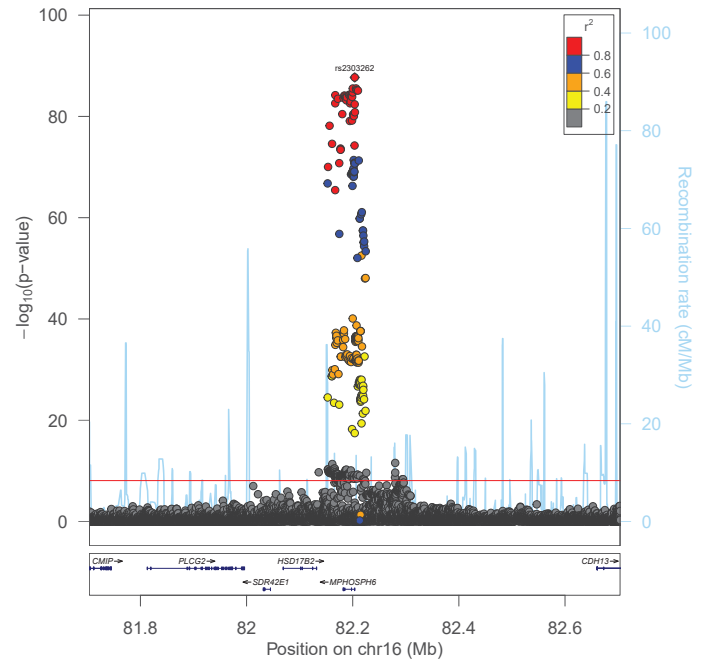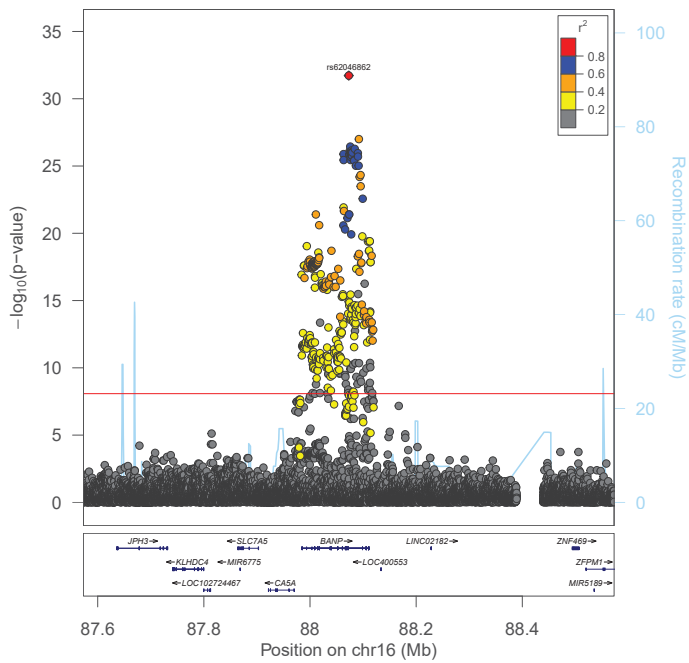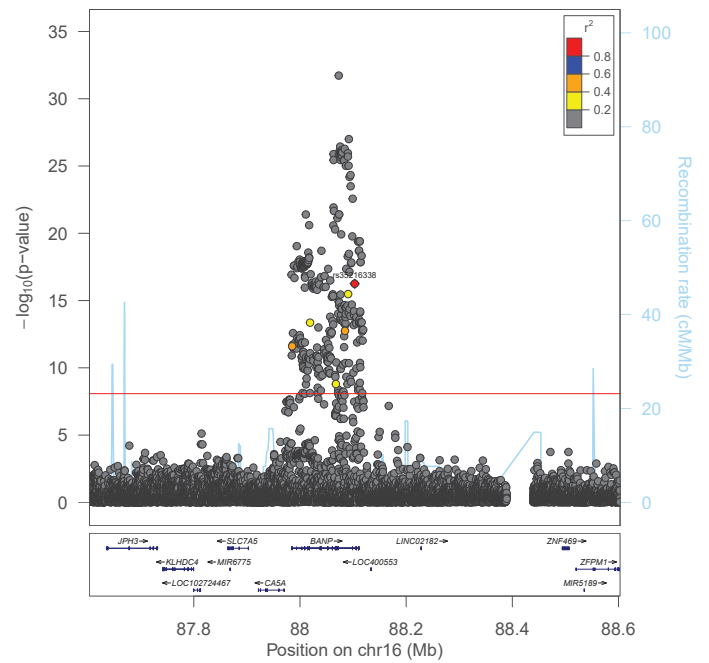



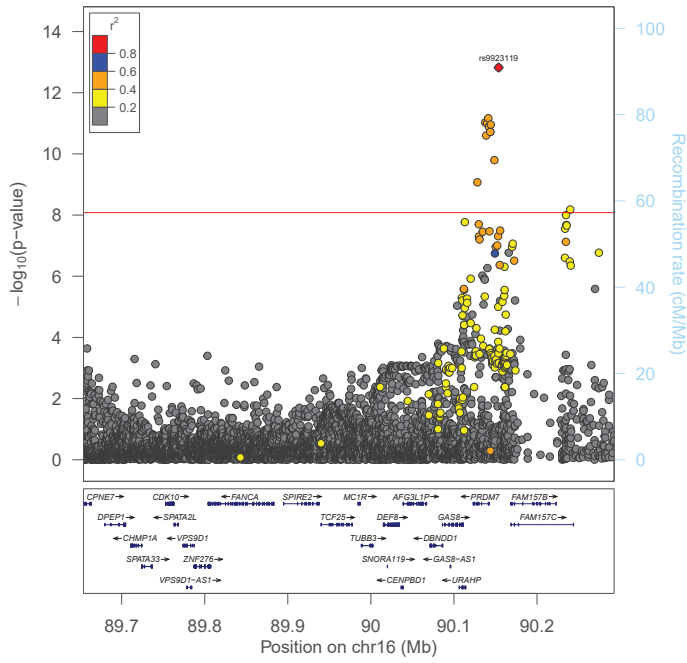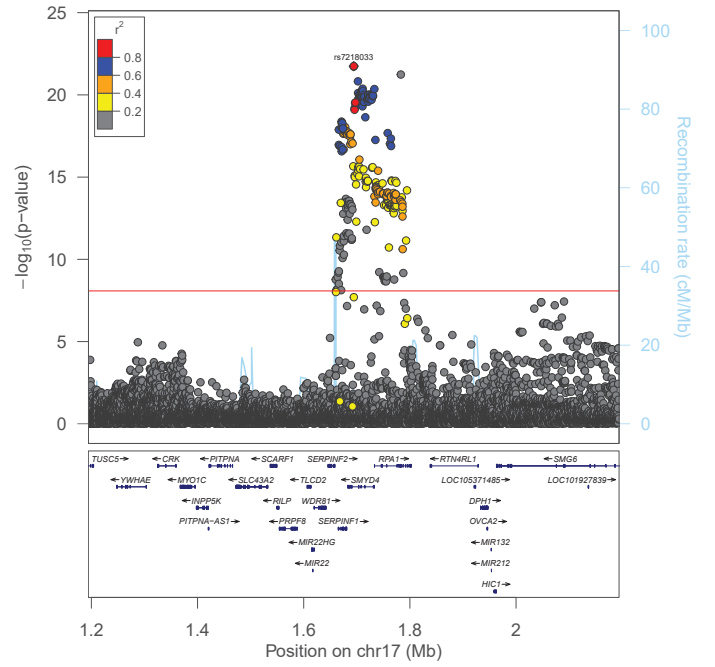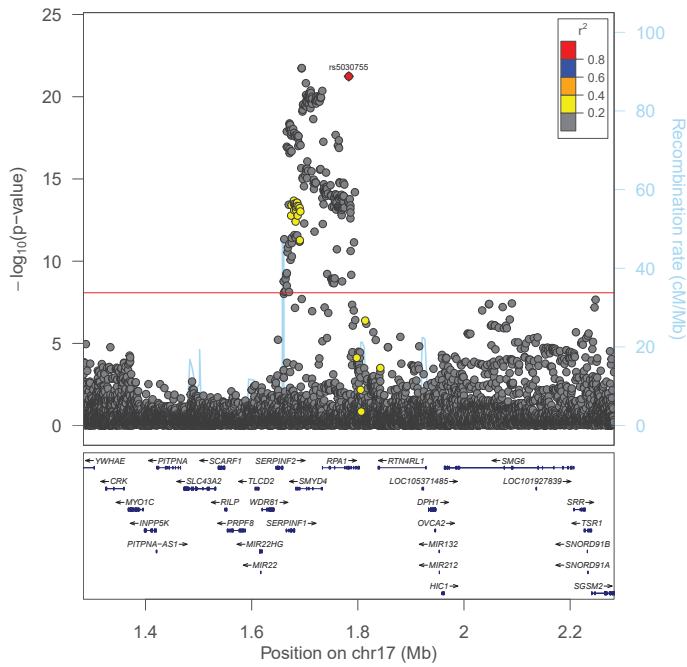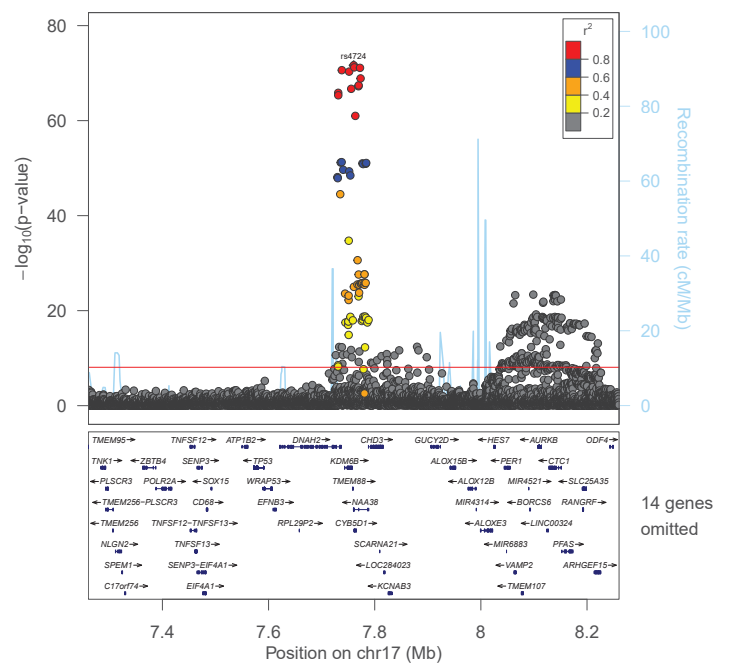

14 genes omitted

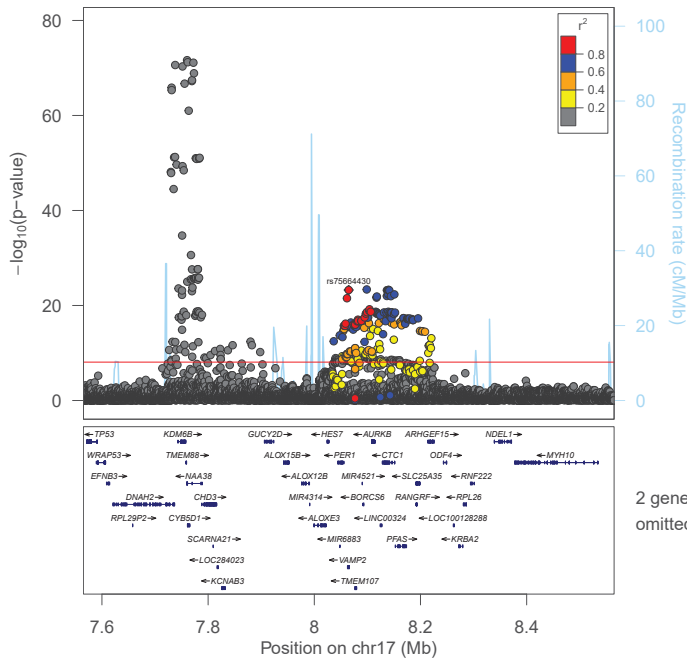

2 genes omitted

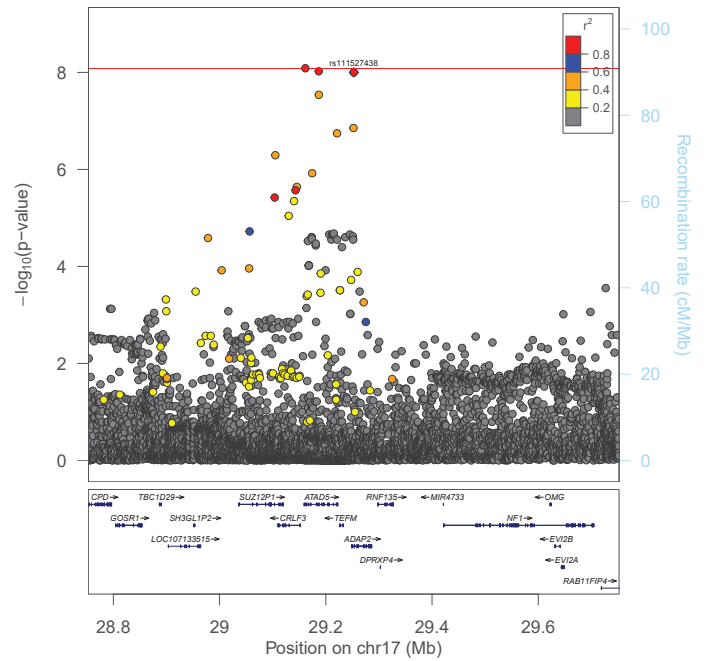



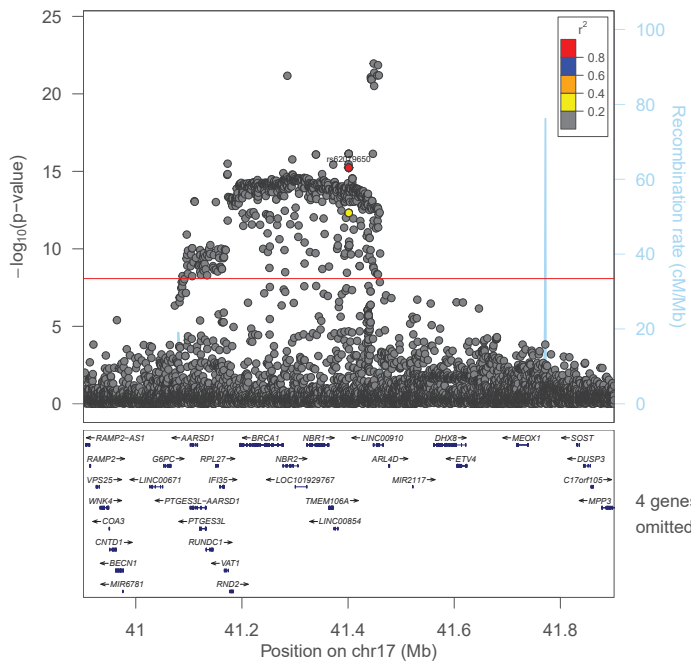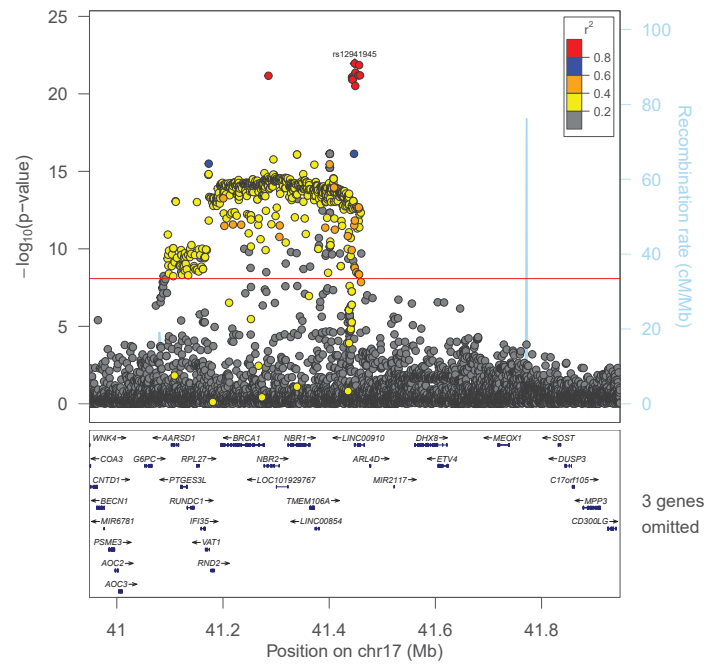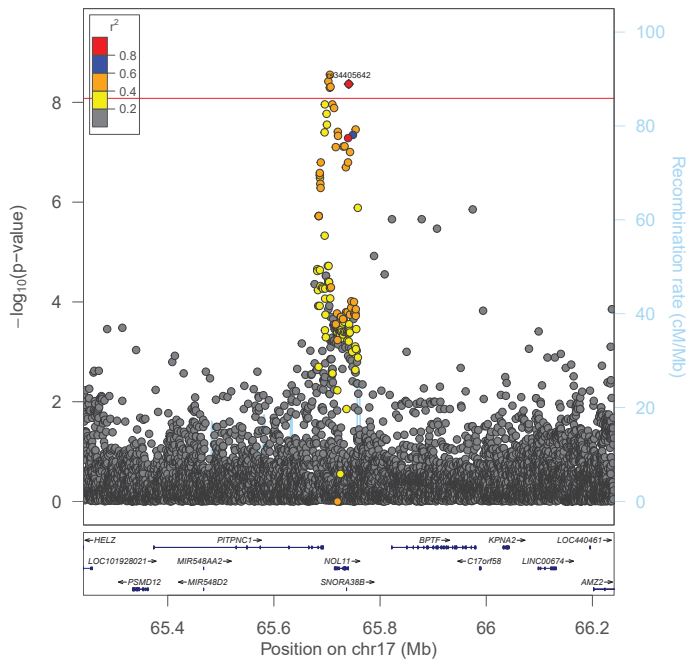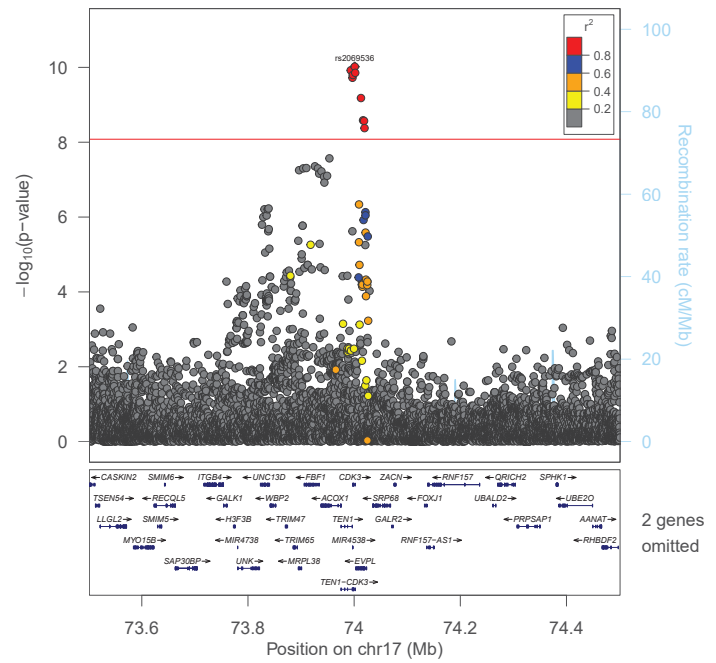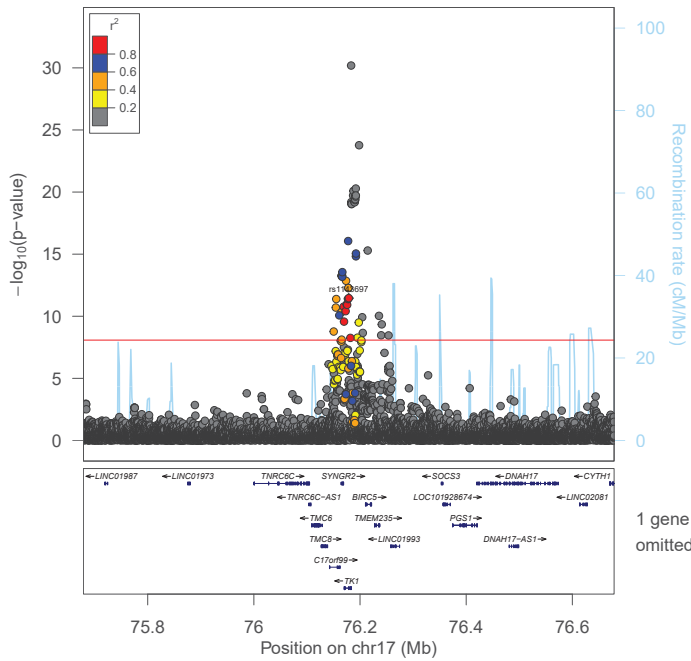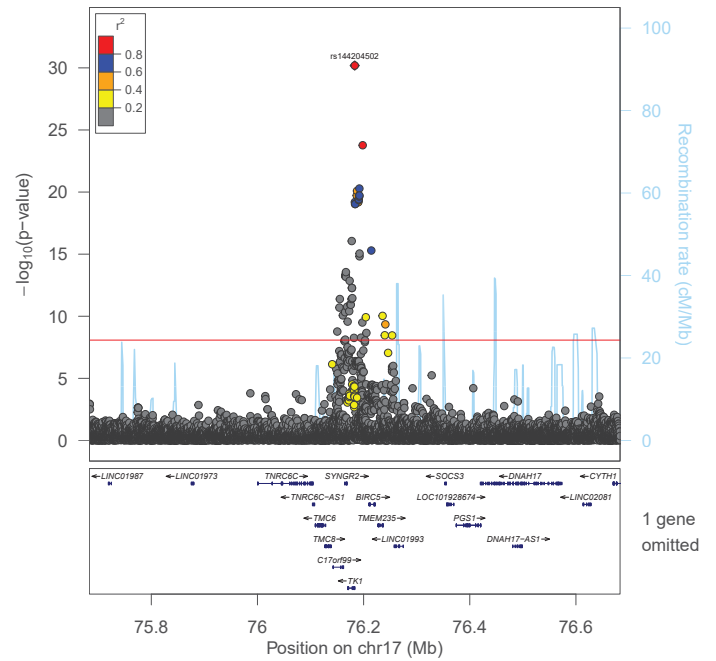

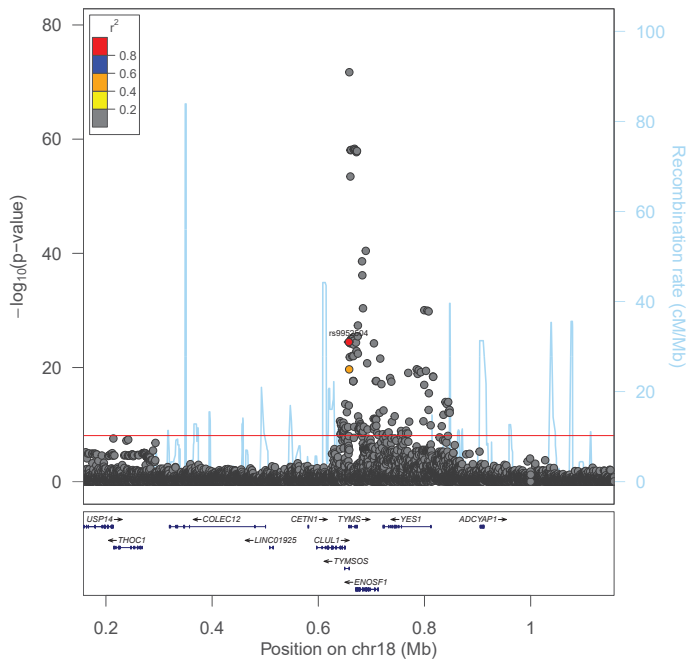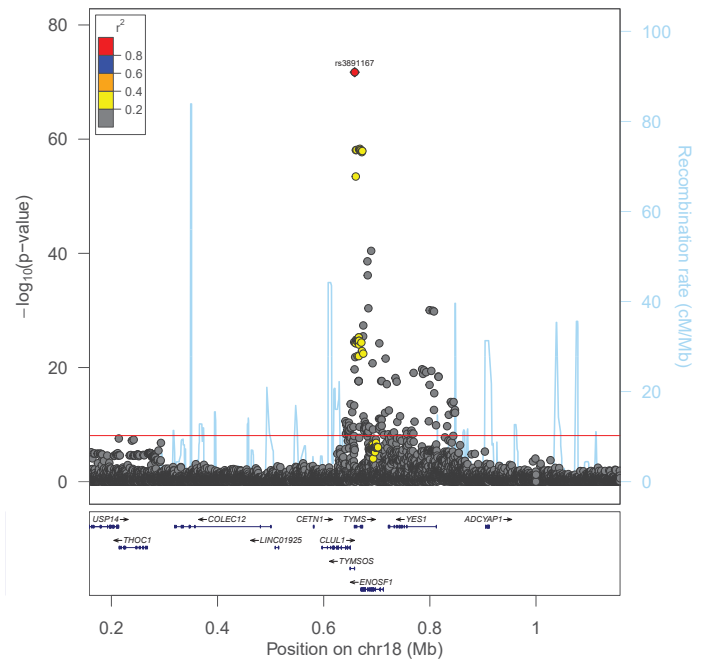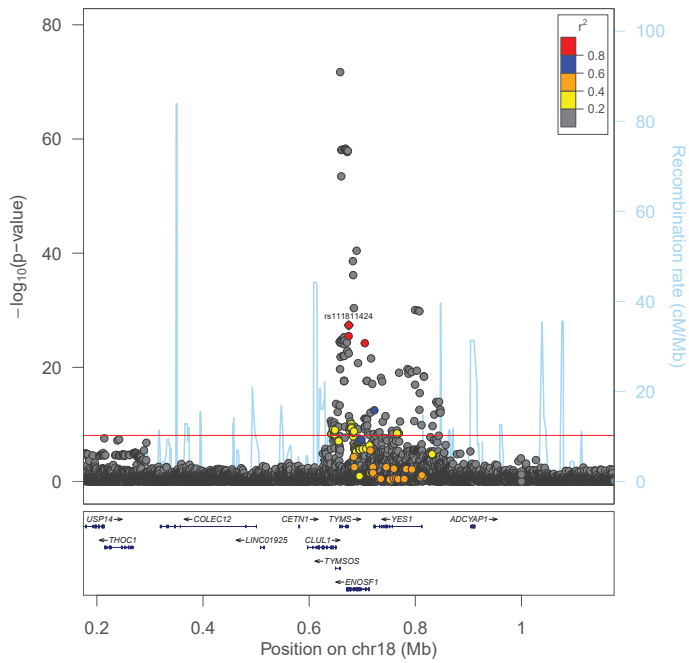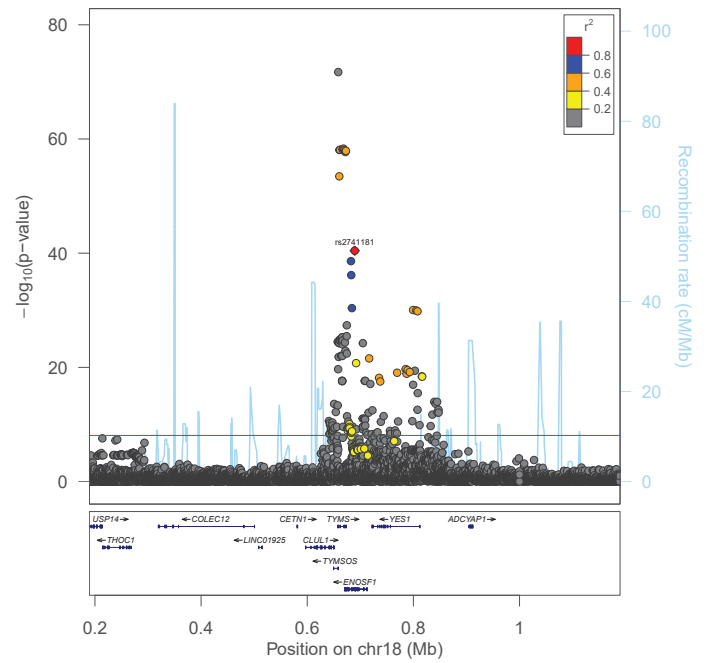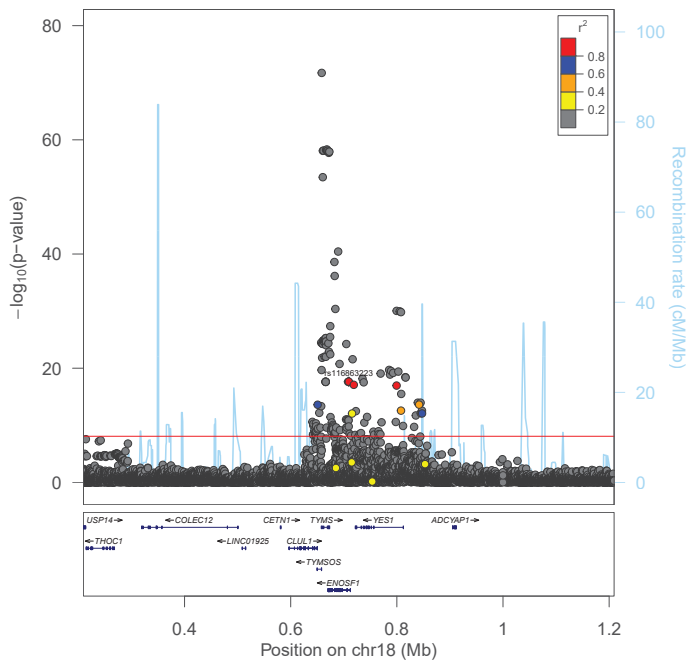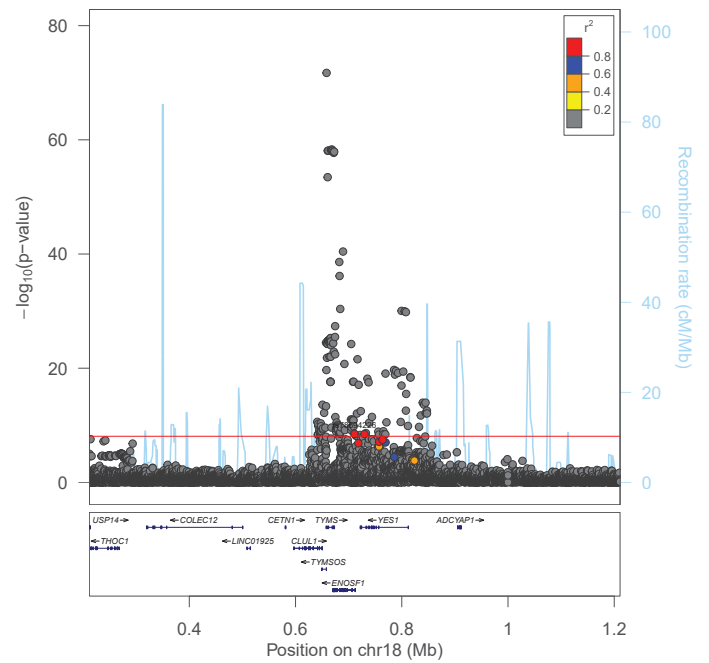

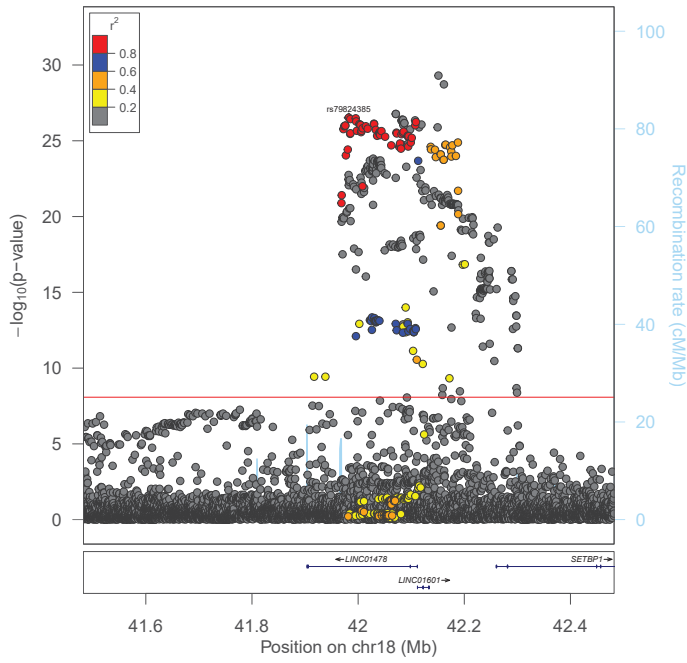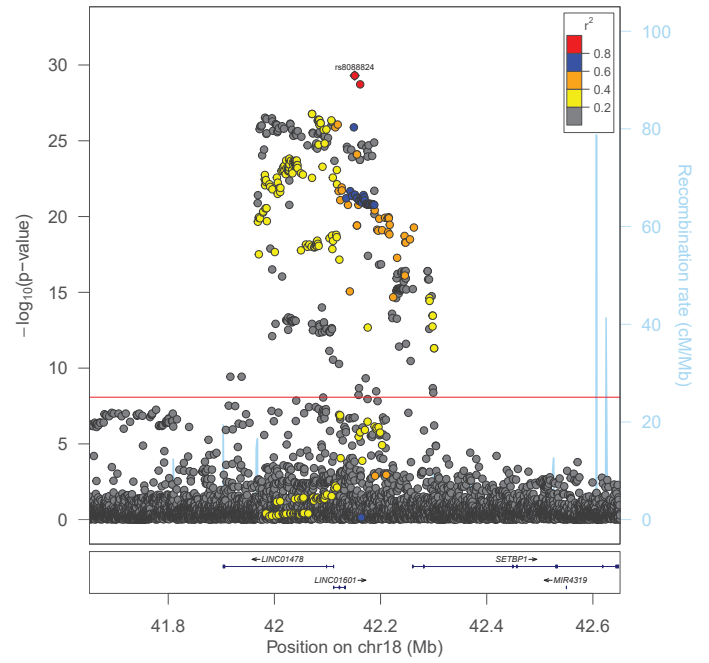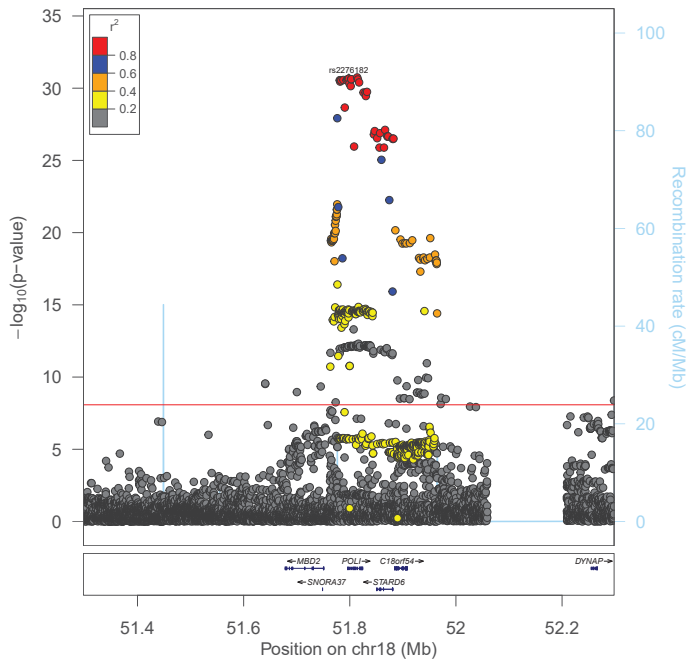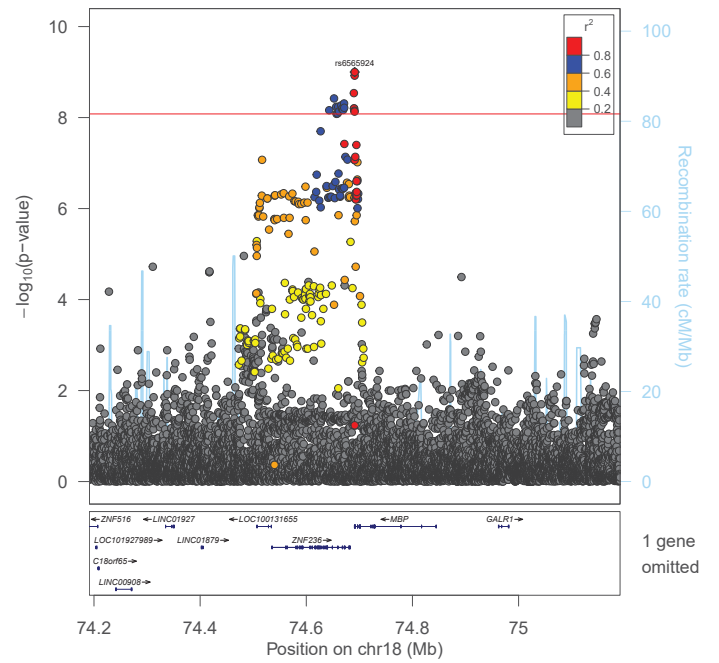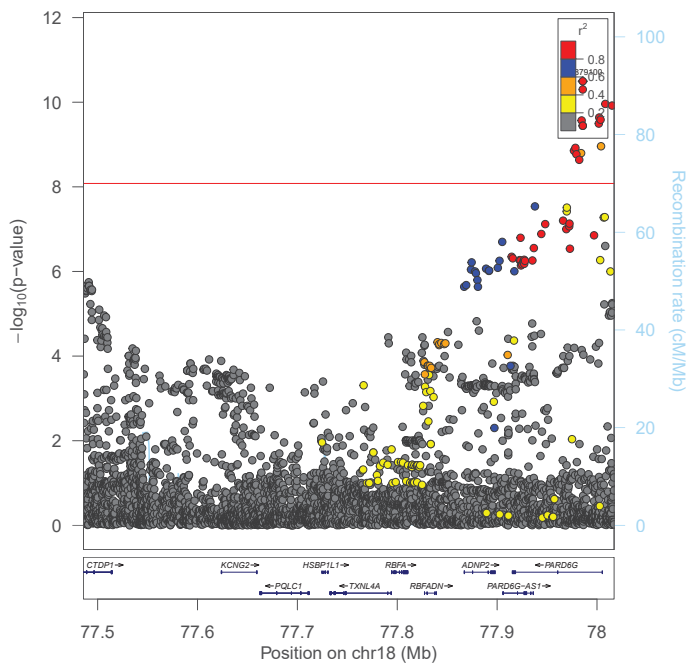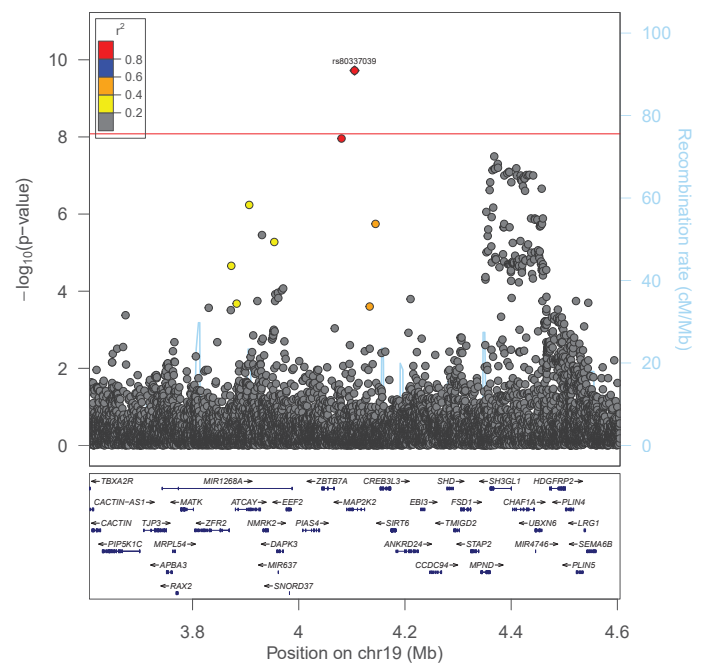

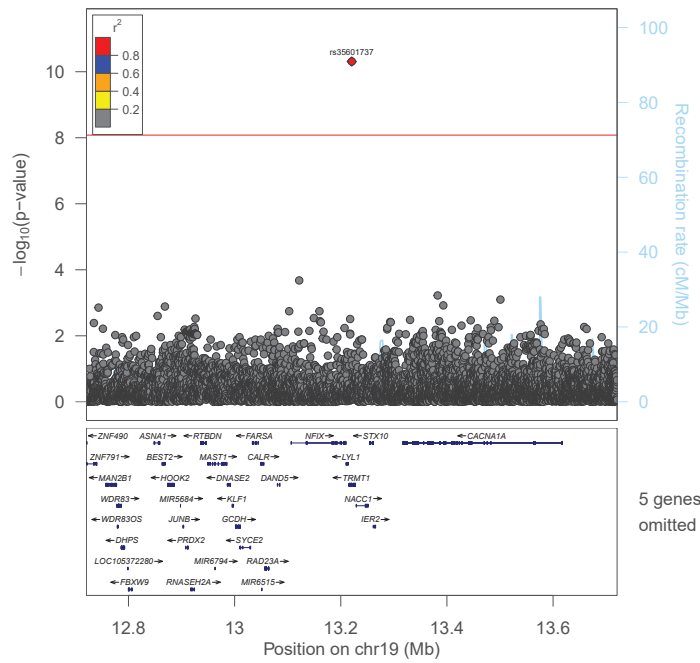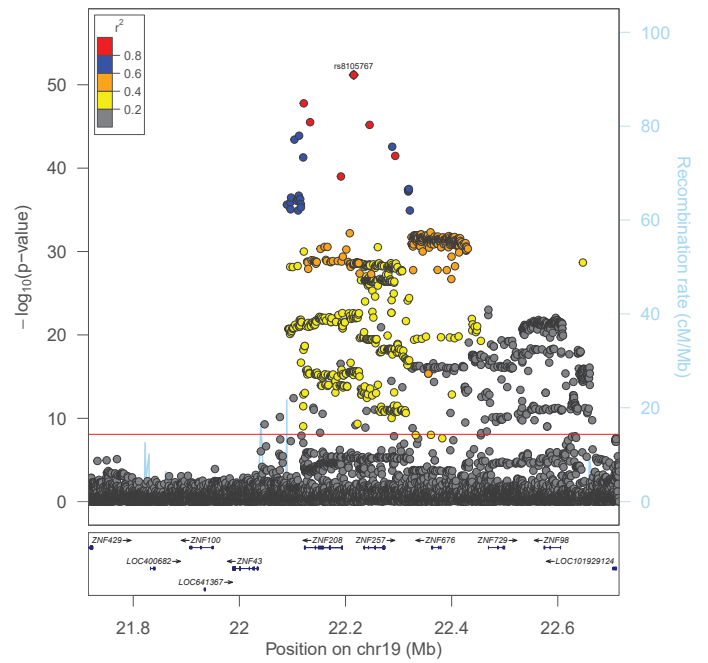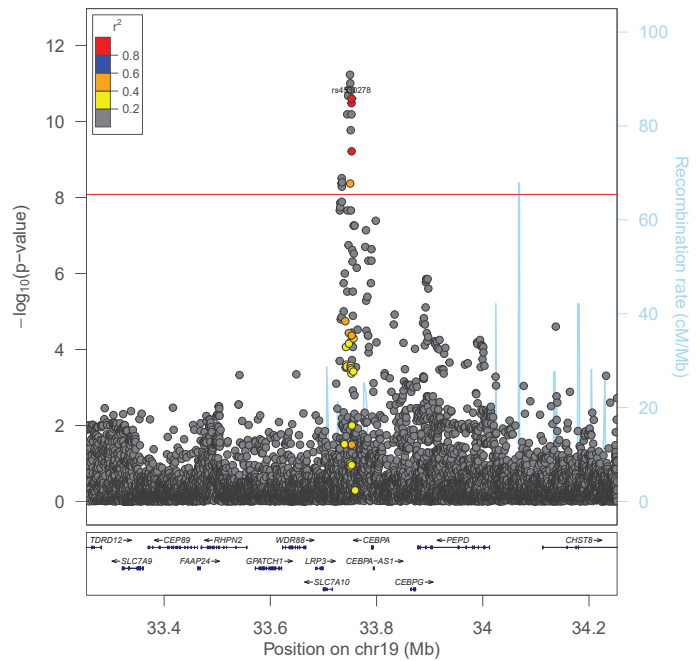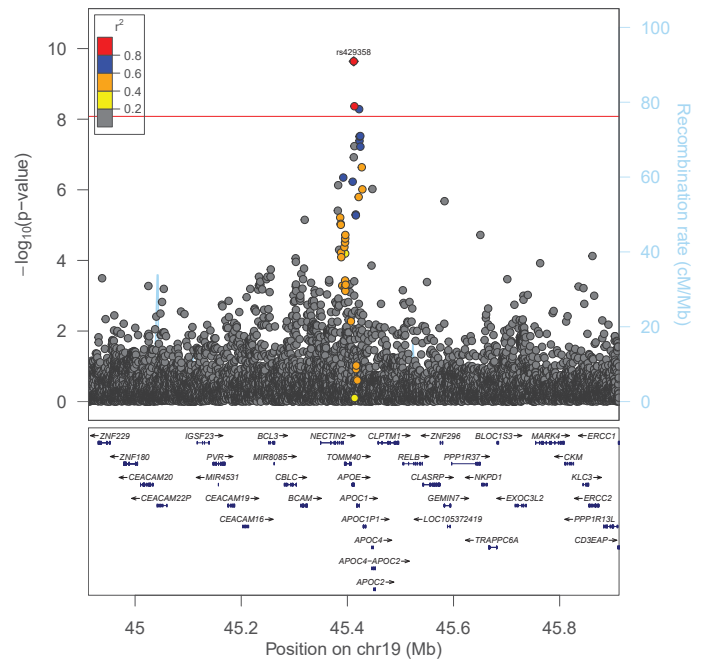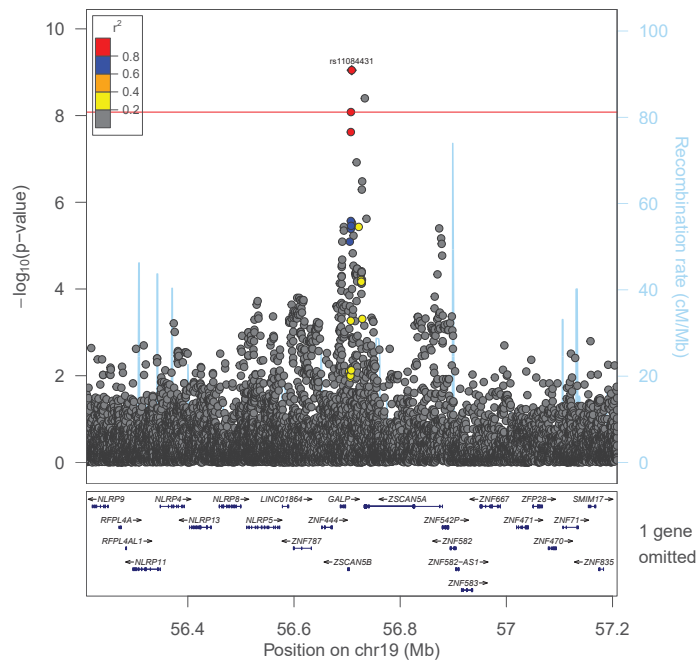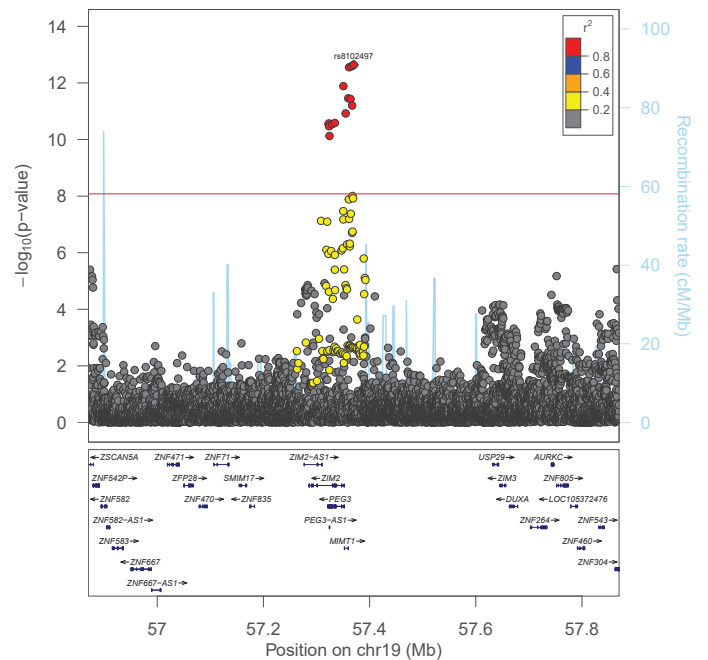

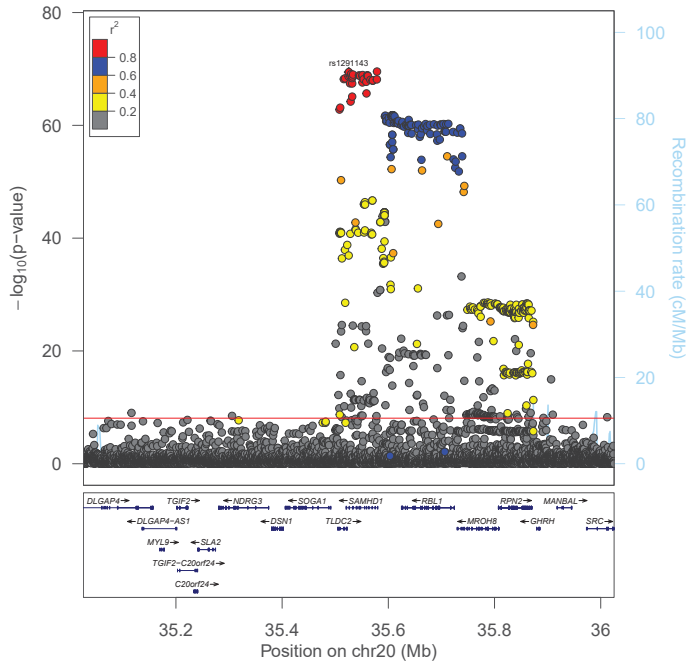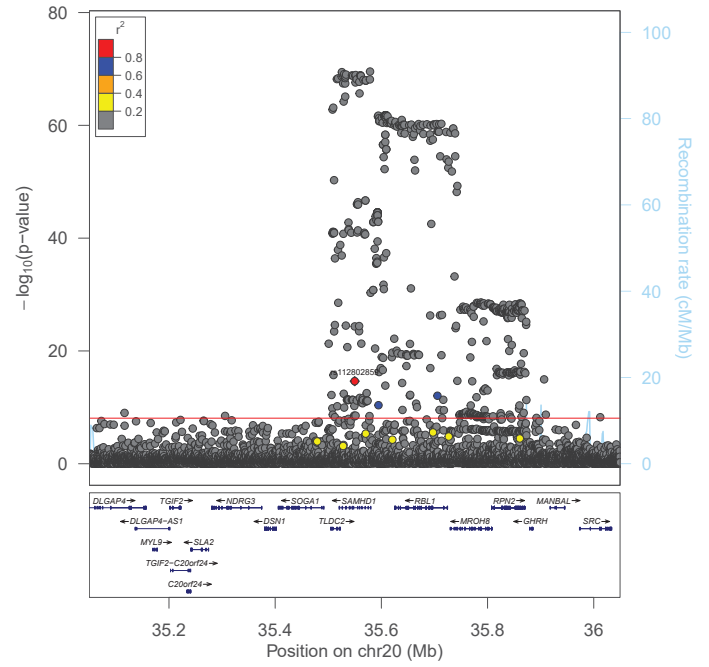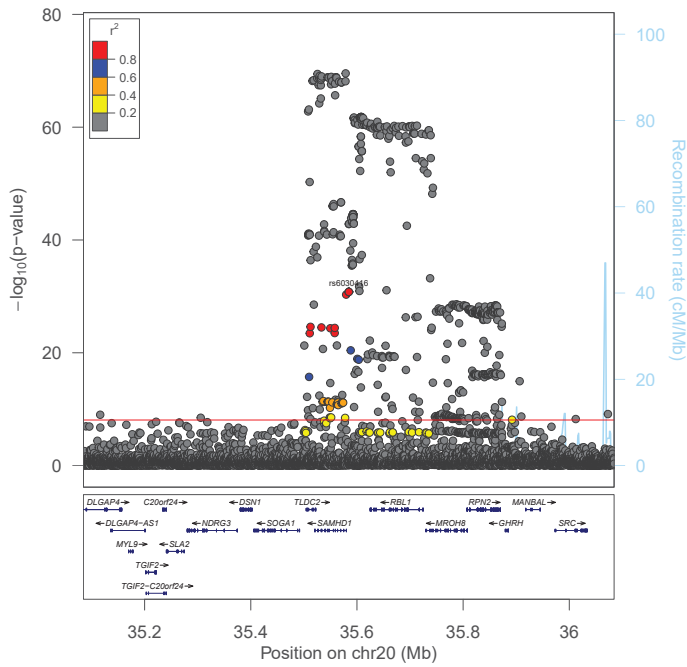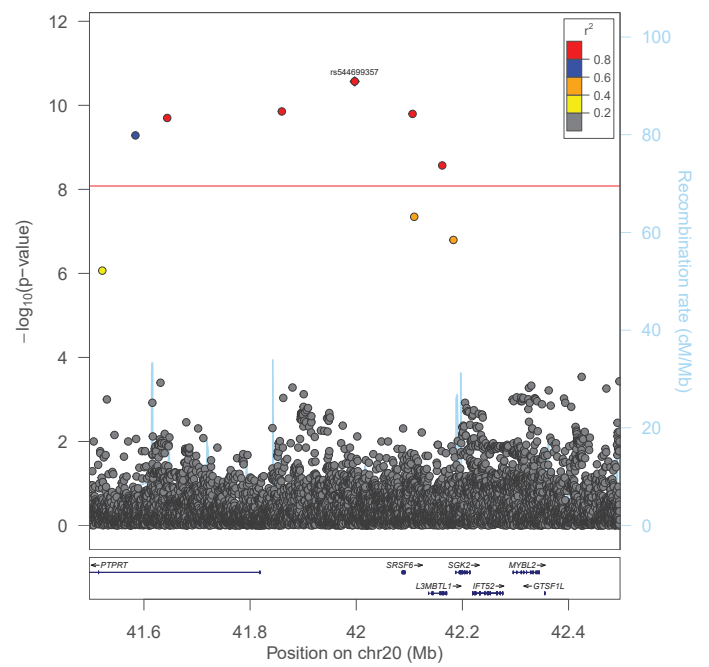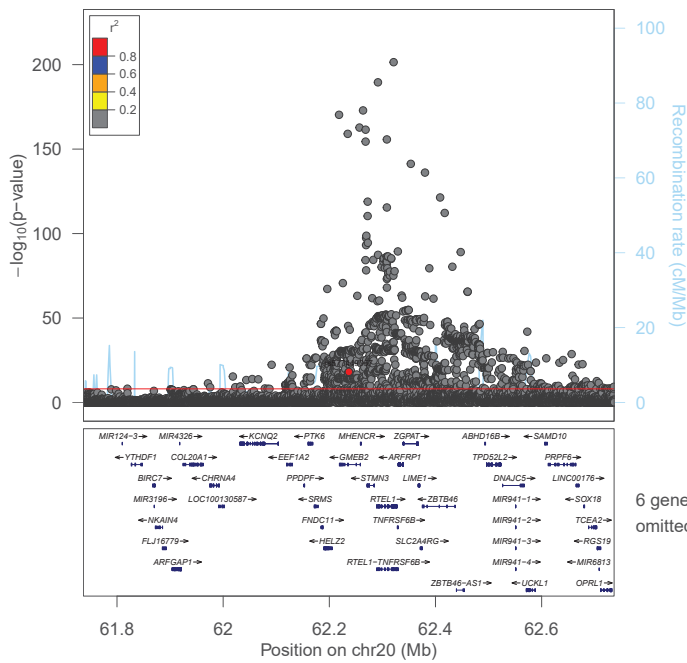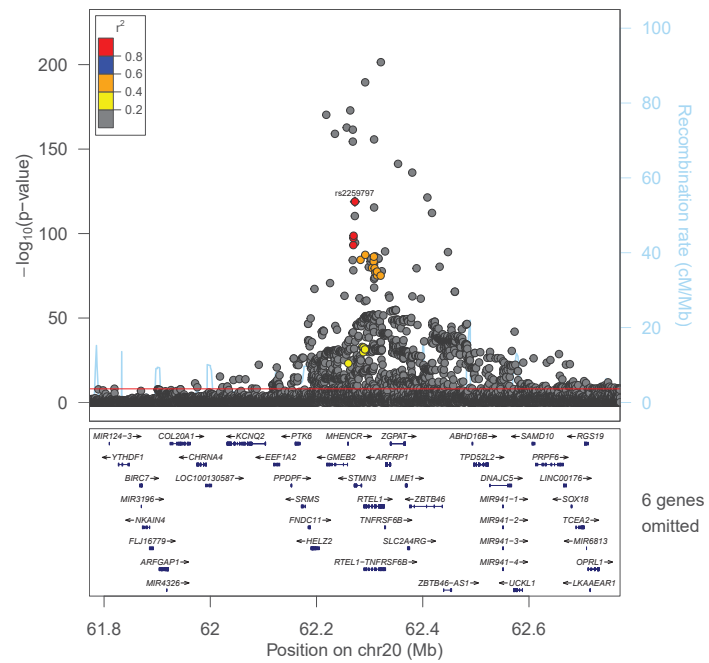



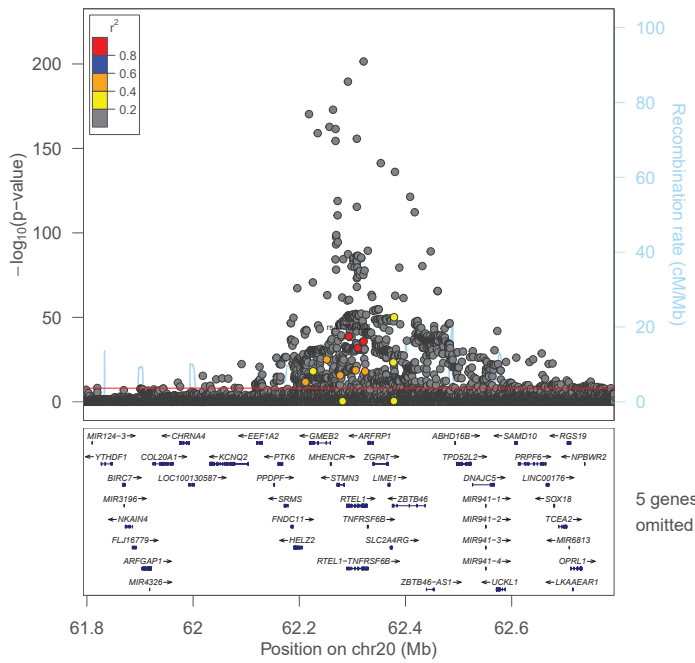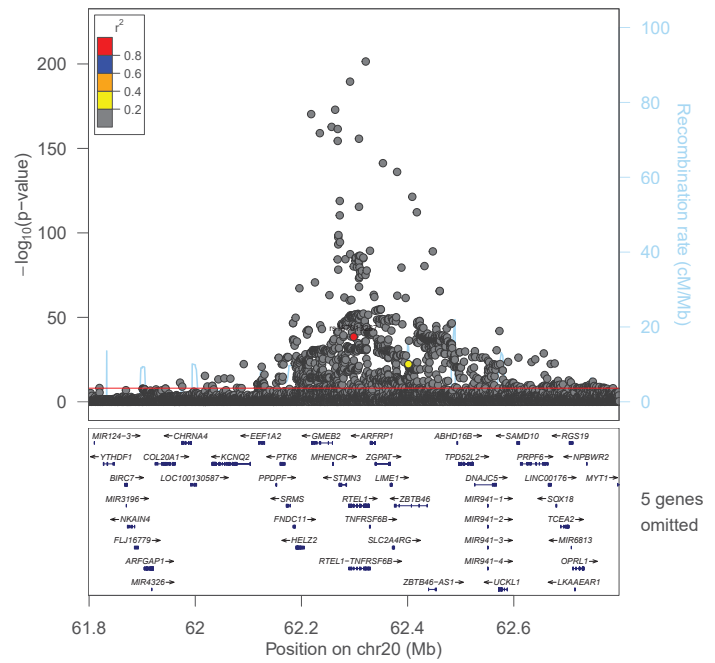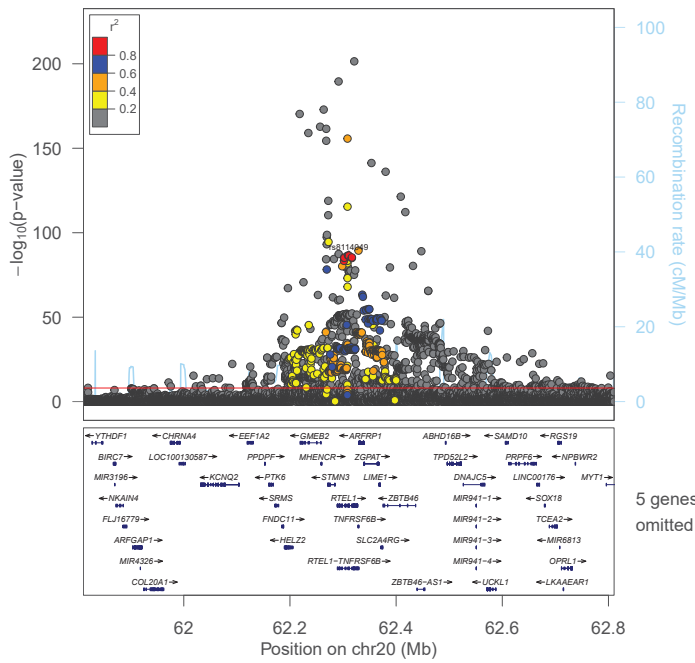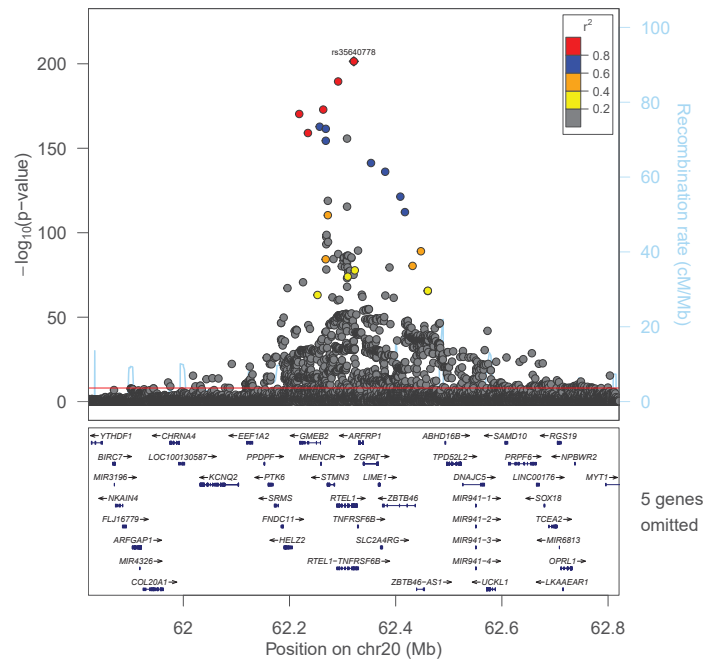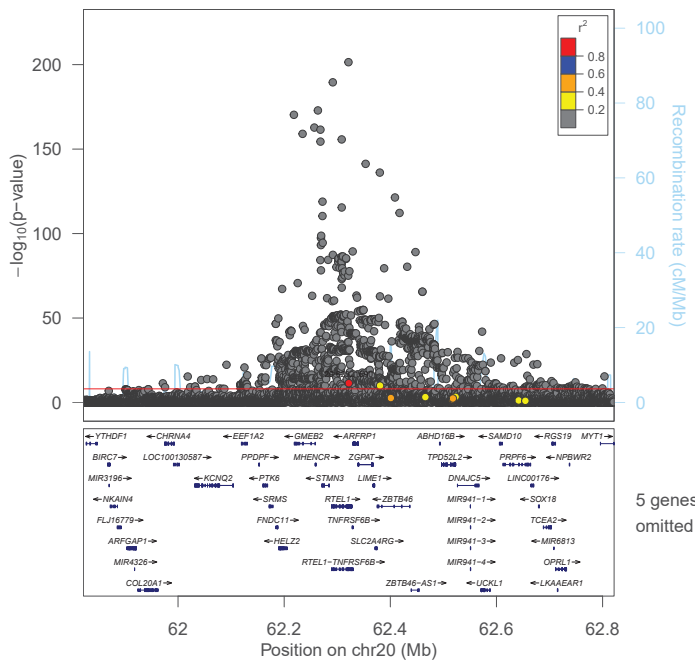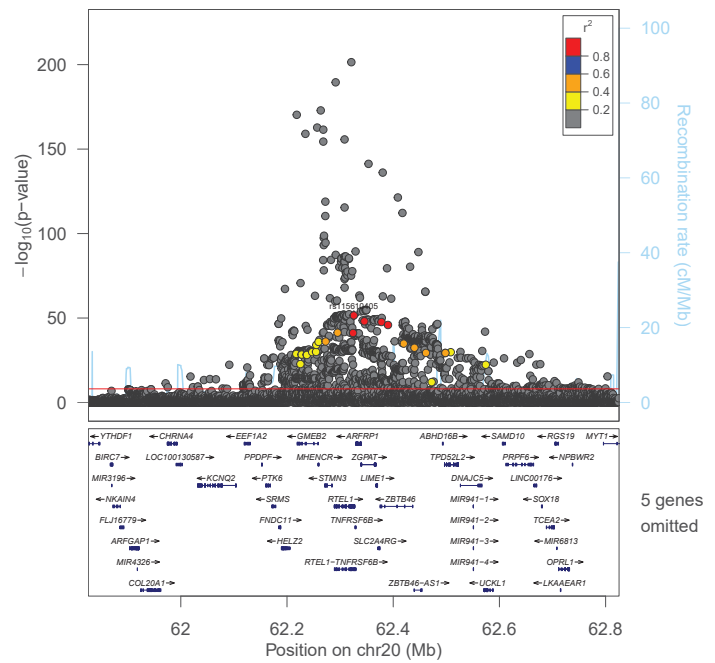

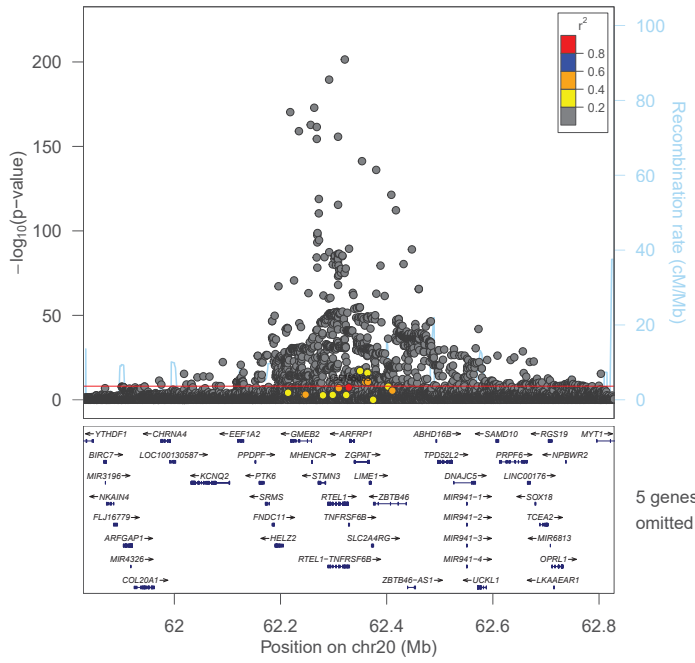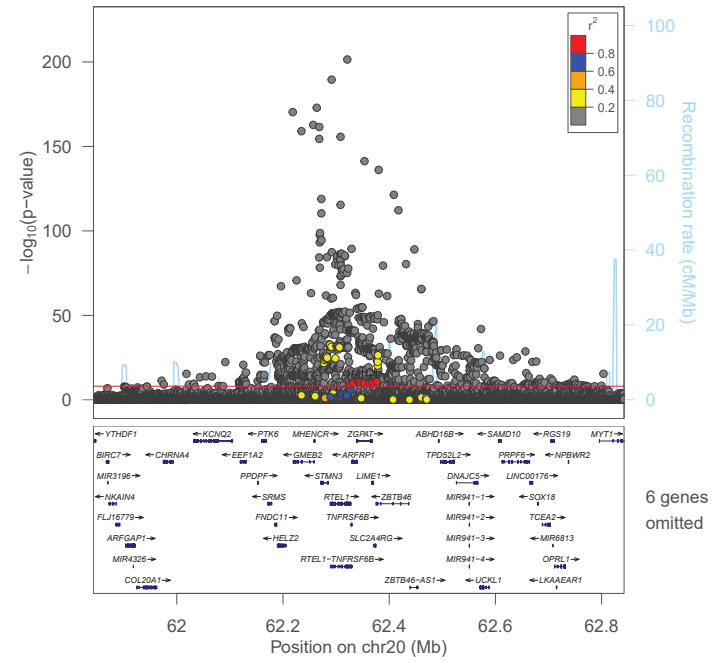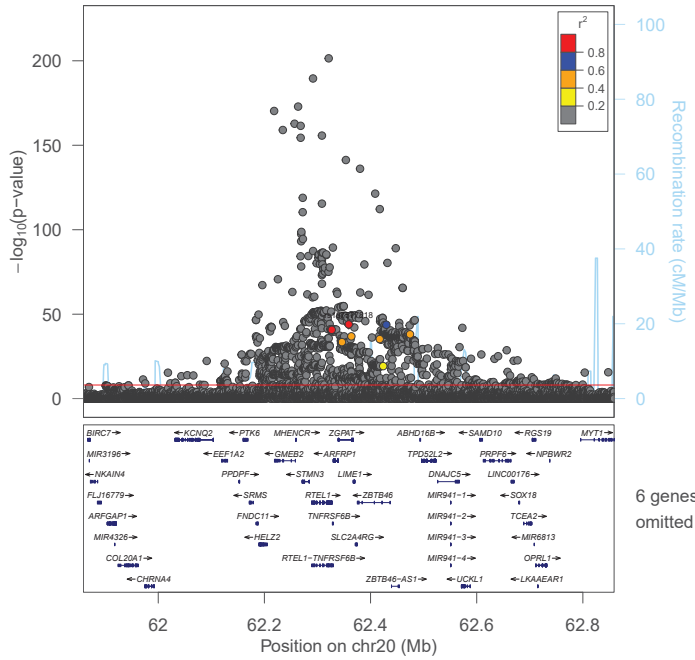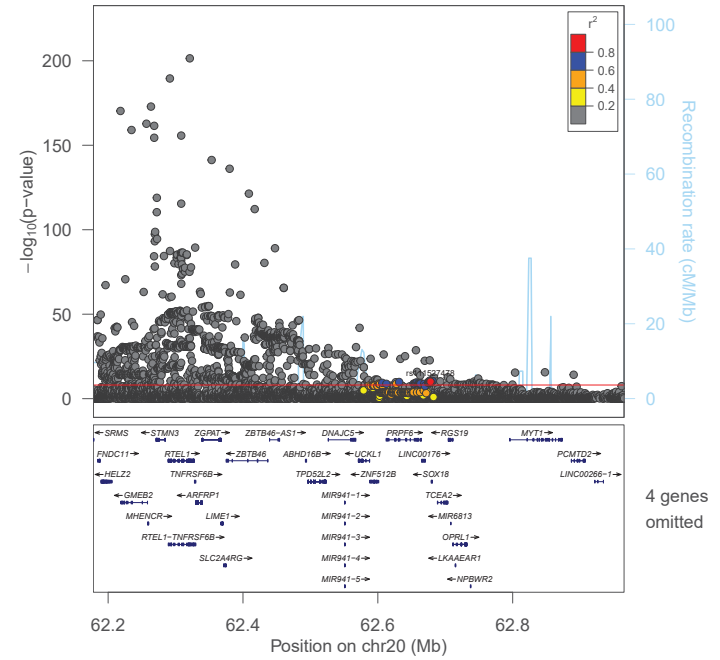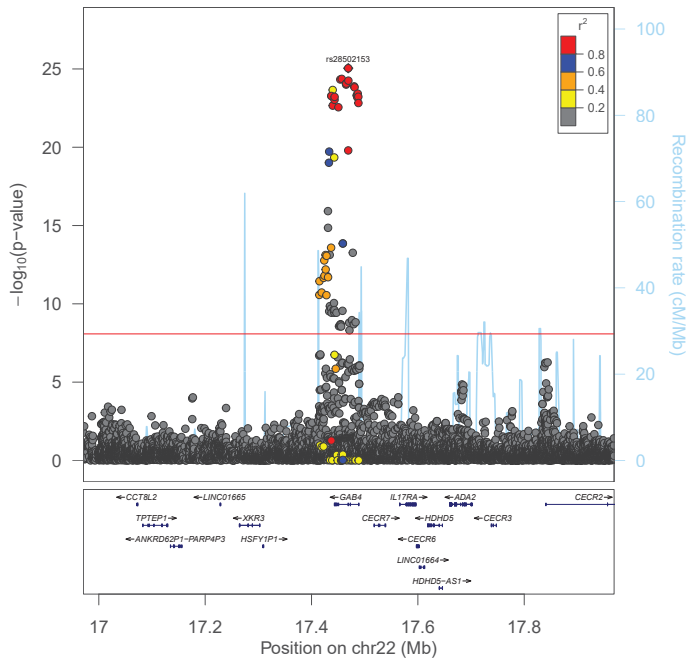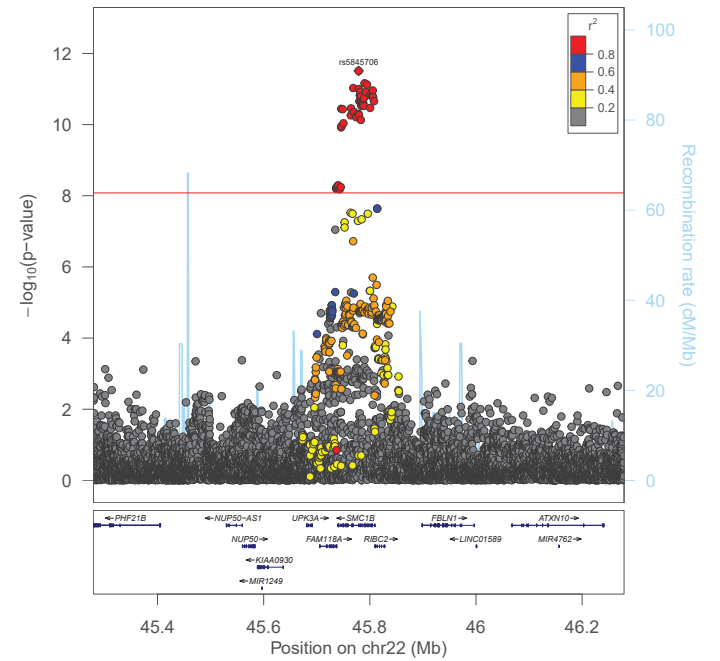

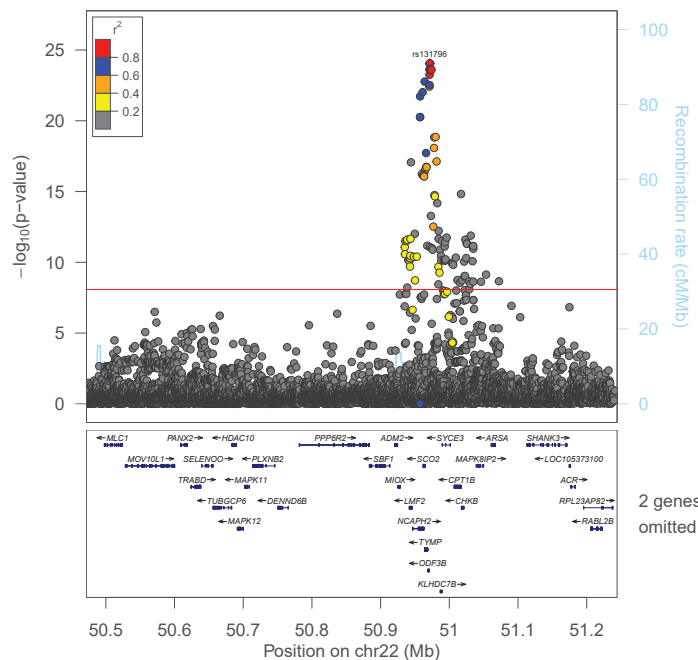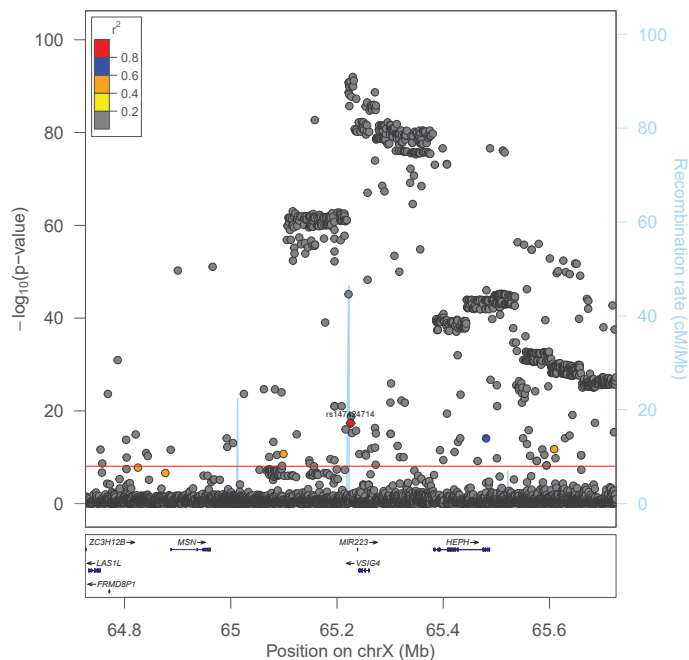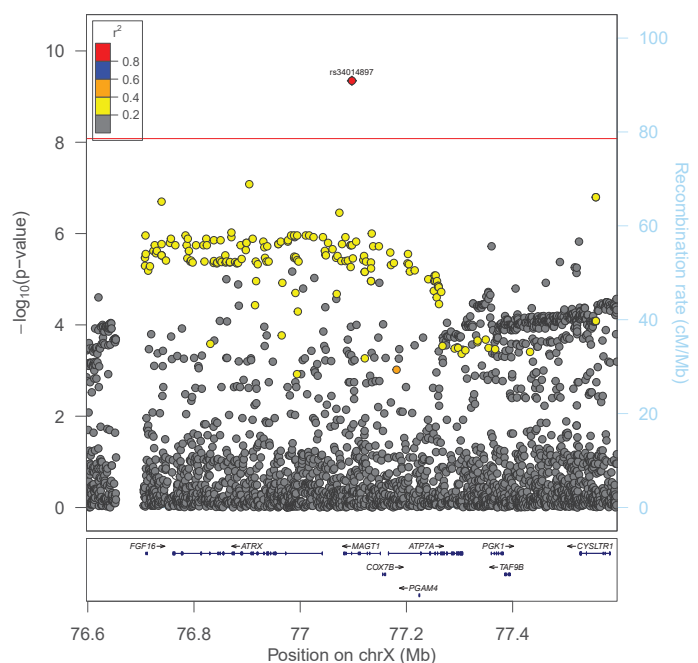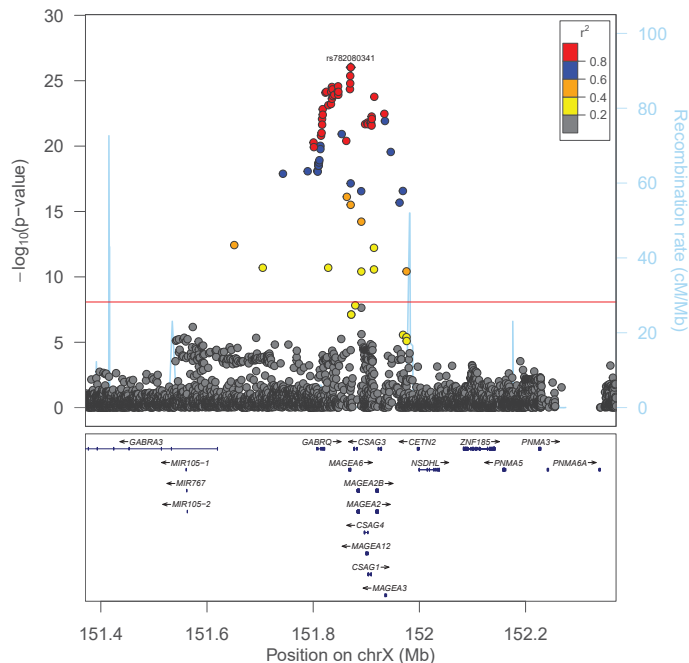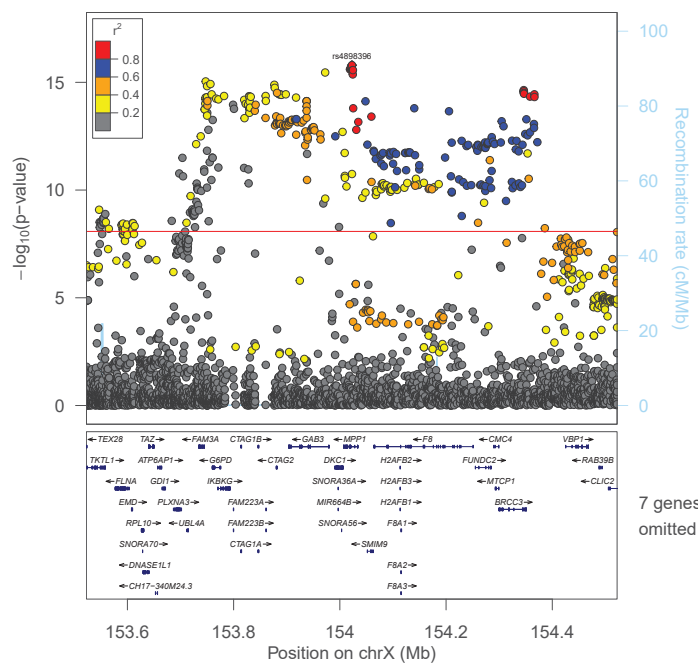

Supplement: Supplementary file [file media-1.pdf]
